## Review Article

# Maternal immune activation and role of placenta in the prenatal programming of neurodevelopmental disorders

Rebecca M. Woods<sup>1,\*</sup>, Jarred M. Lorusso<sup>1,\*</sup>, Jennifer Fletcher<sup>2</sup>, Heidi ElTaher<sup>2,3</sup>, Francesca McEwan<sup>1</sup>, Isabella Harris<sup>1</sup>,  Hager M. Kowash<sup>4</sup>, Stephen W. D'Souza<sup>4</sup>, Michael Harte<sup>2</sup>, Reinmar Hager<sup>1</sup> and  Jocelyn D. Glazier<sup>1</sup>

<sup>1</sup>Division of Evolution, Infection and Genomics, School of Biological Sciences, Faculty of Biology, Medicine and Health, Manchester Academic Health Science Centre, University of Manchester, Manchester M13 9PT, U.K.; <sup>2</sup>Division of Pharmacy and Optometry, School of Health Sciences, Faculty of Medicine, Biology and Health, Manchester Academic Health Science Centre, University of Manchester, Manchester M13 9PT, U.K.; <sup>3</sup>Department of Physiology, Faculty of Medicine, Alexandria University, Egypt; <sup>4</sup>Division of Developmental Biology and Medicine, School of Medical Sciences, Faculty of Biology, Medicine and Health, Manchester Academic Health Science Centre, University of Manchester, Manchester M13 9WL, U.K.

**Correspondence:** Jocelyn D. Glazier (j.glazier@manchester.ac.uk)

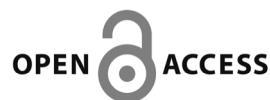

Maternal infection during pregnancy, leading to maternal immune activation (mIA) and cytokine release, increases the offspring risk of developing a variety of neurodevelopmental disorders (NDDs), including schizophrenia. Animal models have provided evidence to support these mechanistic links, with placental inflammatory responses and dysregulation of placental function implicated. This leads to changes in fetal brain cytokine balance and altered epigenetic regulation of key neurodevelopmental pathways. The prenatal timing of such mIA-evoked changes, and the accompanying fetal developmental responses to an altered *in utero* environment, will determine the scope of the impacts on neurodevelopmental processes. Such dysregulation can impart enduring neuropathological changes, which manifest subsequently in the postnatal period as altered neurodevelopmental behaviours in the offspring. Hence, elucidation of the functional changes that occur at the molecular level in the placenta is vital in improving our understanding of the mechanisms that underlie the pathogenesis of NDDs. This has notable relevance to the recent COVID-19 pandemic, where inflammatory responses in the placenta to SARS-CoV-2 infection during pregnancy and NDDs in early childhood have been reported. This review presents an integrated overview of these collective topics and describes the possible contribution of prenatal programming through placental effects as an underlying mechanism that links to NDD risk, underpinned by altered epigenetic regulation of neurodevelopmental pathways.

## Introduction

The aims of this review are to consider the molecular pathways by which infection in pregnancy, and prenatal exposure *in utero* to maternal immune activation (mIA), affects fetal neurodevelopment and might program neurodevelopmental disorders (NDDs), which manifest later in life. This involves an intricately complex set of signalling pathways that appear to be dysregulated following mIA and the ensuing maternal stimulation of cytokine and chemokine release. We present an integrated approach across the developmental timeline and focus on key mechanistic pathways that are likely to be involved and modulated by epigenetic changes. Importantly, we address mIA-associated changes in the maternal, placental and fetal compartments, with particular emphasis on neural development, along the longitudinal axis of signal transduction. Through this approach, we aim to delineate loci of dysregulated responses following maternal infection and evoked mIA, some of which may be maladaptive and developmentally enduring.

\*Rebecca M. Woods and Jarred M. Lorusso shared first co-authorship

Received: 07 March 2023

Revised: 16 May 2023

Accepted: 17 May 2023

Accepted Manuscript online:  
17 May 2023

Version of Record published:  
31 May 2023

We briefly consider the evidence for how maternal infection influences NDD risk, then discuss animal models of mIA and their validity, focussing on mIA models in mice and rats. We then examine the role of the placenta in the programming of NDDs through a cytokine-mediated pathway and associated inflammatory responses and explore what neurodevelopmental impacts this might have, and how the mIA-driven dysregulation of neurodevelopmental events is likely to involve epigenetic modulation. We finally discuss the translational significance of the collective scope of literature included in the review in the context of the recent COVID-19 pandemic and potential neurodevelopmental impairments and the possible underlying contribution of prenatal programming.

## Prenatal infection, maternal immune activation and neurodevelopmental disorders

During pregnancy, major physiological, endocrinological and immunological adaptations occur to ensure a successful outcome to pregnancy and optimal fetal development [1]. Understanding the molecular mechanisms of how these adaptations are orchestrated and regulated, particularly as regards immunological changes, is crucial if vaccines against microbial infections are to be developed to offer protection to both the pregnant mother and developing fetus [1,2]. Such knowledge is also vital if functional loci are to be identified for targeted interventions. These considerations are set against a background whereby an intricate immunological balance prevails that allows immunological tolerance to the semi-allogenic fetus but also protects both the mother and fetus against infectious pathogens [1,2]. Hence, a perturbed immunological environment during pregnancy, induced by a stressor such as maternal infection, can lead to increased risk of multiple pregnancy dysfunctions with potential impacts on fetal development [1,2].

Infectious pathogens are known to display seasonal variance, and it was noted that babies born in winter and spring months had an increased risk of developing schizophrenia (SZ) and other neuropsychiatric disorders when compared with the rest of the general population [3]. Indeed, many epidemiological studies investigating the prenatal exposure to the influenza epidemics of 1954, 1957 and 1959 reported a significant increase in adult SZ in the offspring of exposed mothers [4–6], with collective evidence supporting a well-established causal relationship between prenatal infection, particularly during the first trimester, and neurological disease of the offspring [7]. Another distinctive example supporting the association between prenatal infection and NDDs is the rubella epidemic of 1964. Prior to it, the incidence of NDDs such as autism spectrum disorders (ASD) and SZ was less than 1%, while subsequent to the epidemic, the incidence of ASD increased to 13% while that of SZ rose to 20% [8]. Additionally, outbreaks of measles, mumps, *Toxoplasmosis gondii*, as well as polio, cytomegalovirus and chickenpox have increased the incidence of NDDs [8–10]. However, the broad diversity of pathogens implicated in increasing NDD risk, involving both viruses and bacteria, suggest the causal link is not limited to a specific pathogen *per se*, but rather to a common immune response to these pathogens acting as a key driving force, with mIA proposed as the fundamental mediator between the prenatal infection and the resulting neuropathological changes in the offspring [8–13]. Indeed, many epidemiological studies have explored the detrimental effects of exposure to infection during pregnancy not only on the raised risk of maternal illness severity [14] but also the propensity to altered fetal neurodevelopment through mIA-driven pathways with the subsequent manifestation of NDDs, most notably ASD and SZ in the offspring [8,11,15–17].

While many animal and human studies support the hypothesis of ‘mIA as a mechanism for subsequent NDDs’ [9,13,18], it is worth commenting that many cases of prenatal infections, do not, however, result in the development of a NDD phenotype in the progeny. This suggests that mIA may act to ‘prime’ for NDDs, working with other synergizing risk factors or ‘hits’, such as genetic predisposition, abnormal immune status and simultaneous or subsequent exposure to other environmental challenges to induce neuropathological changes [8,11]. Hence, the core concept of the ‘multiple-hit paradigm of NDDs’ for disorders such as SZ [19,20], involves the interplay between infection, genetics and environment [21,22]. Within this paradigm, the propensity to develop NDDs arises from mIA-induced disruption of neurodevelopment and maturation of the brain in prenatal and early neonatal life, leading to programmed and lasting changes in behavioural development and an increased risk of developing SZ during late adolescence or early adulthood [23], with a similar concept modelled for ASD [24].

It is interesting to note that the risk that mIA imparts on neurodevelopmental outcomes [11] is not limited to neurodevelopmental psychiatric conditions such as SZ [10,25] and ASD [26–28] but also extends to attention-deficit hyperactivity disorder (ADHD) [29]. Moreover, while epidemiological research has drawn links between maternal infection, immune activity, and subsequent neurodevelopmental risk, these varied neurobehavioural outcomes illustrate that phenotypic outcomes are heterogeneous in nature, and likely to be influenced by a number of factors that dictate both the specificity and severity of disease. Such heterogeneity in neurodevelopmental sequelae may also reflect a lack of concordance in the developmental timing of infection [30,31] as well as a failure to consider concurrent

environmental stressors that may inflate the relationship between the elicited immune response and offspring psychiatric outcome [32]. Another interpretation consistent with such outcomes is that a proportion of offspring exhibit an innate degree of resilience to mIA influences, with apparent protection from neurodevelopmental pathology, suggesting multiple factors interact to confer individual susceptibility to disease risk [30,33,34]. In behaviourally-susceptible offspring, for example, significant differences in gene expression in brain regions associated with NDDs are found, and subgroups can be additionally identified related to differences in offspring plasma cytokine concentrations of IL-6, TNF $\alpha$ , IL-1 $\beta$  and IL-10 [34], mirroring what can be seen in cases across clinical diagnostic criteria [35–37].

Notwithstanding this complexity, many etiopathological studies have focused on the causal mechanisms between gestational exposure to infection and the development of NDDs and neuropsychiatric disorders of the offspring, with an emergent recognition that maternal infection exposures exhibit some degree of synergism to other metabolic or environmental stressors during pregnancy, such as maternal nutritional deficiency or overnutrition, along with stress [38,39]. Hence, mIA-induced changes in fetal neurodevelopmental trajectory can be viewed broadly within the framework of the Developmental Origins of Health and Disease (DoHaD) paradigm, whereby stressors experienced *in utero* influence fetal developmental processes and trajectories through maladaptive changes that lead to aberrant health outcomes in the offspring [38].

## Preclinical models of mIA and neurodevelopmental disorders

The use of preclinical modelling of mIA, most extensively in mouse and rat models [15,18,40–42], has allowed wide-ranging investigation into the relationship between mIA and subsequent NDD risk, with greatest translational value bestowed when the central focus of investigation is clinically relevant behaviours and conserved molecular mechanisms [40]. Experimental modelling of mIA in mouse and rat models has good physiological and molecular translatability to human disorders, as these species share many neurochemical, neuroanatomical, transcriptomic and epigenetic changes in the offspring's brain, which, along with abnormal behavioural phenotypes, recapitulate several traits seen in human NDDs [31,43,44]. Additionally, these models adequately recapitulate many features of human prenatal forebrain development at gestational landmarks of comparable relative temporality [40,44].

A further translational benefit of these mouse and rat mIA models is that in common to humans, all these species have haemochorial placentation (i.e. the placental trophoblast cells of the exchange barrier are in direct contact with maternal blood [45,46]), allowing some cross-species extrapolation when investigating placental changes arising from mIA-elicited immune responses, altered *in utero* environment, and the effects on placental function and ensuing influences on fetal brain development. They also afford the opportunity to examine the impacts induced by mIA on placental function, concomitant to the neural developmental and maturational processes occurring in the fetus, enabling the evolution of the pathogenesis of NDDs to be examined along a progressive ontogenetic timeline. Their further translational value is underpinned by the conservation of genes involved in placentation across these species [46–48], as well as an array of common molecular mechanisms of placental function and placental transport physiology [45,49–53], making them attractive models to mimic the programming of dysfunctional developmental processes of human pregnancy.

However, one distinction to note is that the placentas of mouse and rat are subdivided into two functional zones, the labyrinth zone (LZ) concerned with maternofetal nutrient exchange and the junctional (or basal) zone (JZ) which has an endocrine function [45–48]. Another important point worth raising, is in rodents such as mouse and rat, the visceral yolk sac (hereafter referred to as yolk sac) is retained throughout pregnancy [54,55], in contrast with the human yolk sac which undergoes regression towards 10–12 weeks of pregnancy [56], although both contribute to early fetal growth and development [54,56,57] and, further, transcriptomic analysis of yolk sac gene expression shows a high degree of conservation across these species [57]. We have recently identified the rat yolk sac as an immunoinflammatory and mIA-responsive tissue which expresses Toll-like receptor (TLR)3 and stimulates proinflammatory cytokine gene expression [43]. As the rodent yolk sac contributes to the maternofetal transport of nutrients, influencing fetal growth and developmental processes [43,54,55], and is the source of microglia progenitors that migrate and colonise the embryonic brain [58,59], this has relevance as the inflammatory stimulation of microglial activation is considered a risk factor for the development of NDDs, as discussed below. Interestingly, we have demonstrated differential temporal responses to mIA in fetus-matched placental and yolk sac tissues [43], making this an important area of study for future research efforts, but within the scope of this review, we focus on placental effects.

Infectious pathogens such as influenza, as well as pathogen-associated molecular patterns (PAMPs) such as lipopolysaccharide (LPS), a TLR4 agonist to mimic bacterial infection, or viral mimetics such as polyinosinic:polycytidylic acid (poly(I:C)), a double-stranded RNA analogue and TLR3 agonist, have been widely applied

to simulate infection and hence maternal immune function responses in mIA models [30,31,42,60]. These treatments lead to signal transduction and downstream activation of transcription factors such as nuclear factor kappa  $\beta$  (NF- $\kappa\beta$ ) with consequent transcription of pro-inflammatory and anti-inflammatory mediators such as cytokines and chemokines as well as complement proteins [31], with acute phase elevations of these detected systemically in maternal plasma [43,61–66]. These models are used widely in the context of NDDs such as SZ or ASD, in line with the epidemiological observations following infection [26,27]. However, as already noted, these models do differ in pathogen, dose and gestational timing of immunostimulation [15,40,42,60], as well as offspring phenotype being investigated, generating complexity as regards outcomes reported across manipulations [31,44].

In particular, the gestational timing of immunostimulant administration and magnitude and endurance of mIA responses are likely to determine which neurodevelopmental characteristics are affected, dependent on developmental stage, while governing the scope of apparent neurological deficits in the offspring [11,30,31,44]. Another source of experimental variability worth commenting on is the variable molecular weight within some supplier sources of poly(I:C), together with evidence of endotoxin contamination, resulting in different maternal and fetal outcomes [61,67]. Model animal supplier can also affect offspring outcomes, with C57BL/6J mice from specific suppliers showing mIA-induced deficits in prepulse inhibition (PPI) of startle, suggesting variability even within the same strain and an influence of rearing environment [68]. Furthermore, factors inherent to preclinical modelling may also attenuate (or exaggerate) offspring phenotypic display. For example, housing conditions and environmental enrichment have been shown to offset mIA-induced cognitive deficits in both male and female offspring [69,70], suggesting that different postnatal outcomes may be invoked through a degree of neural plasticity related to the offspring's environmental experience. Such sources of variability can be capitalised on to reflect clinical mIA in different contexts [71].

Despite these complexities, the translational validity of these models relies on behaviour in model species that mimics the phenotypes of NDDs, such as changes to social functioning [72,73]; endophenotypes such as sensorimotor gating dysfunction as measured by impaired PPI of startle [74,75]; or cognitive tasks reflecting analogous processes between the model species and humans [76]. Their face validity is supported by disease-related phenotypes including cognitive deficits of specific relevance to NDDs, such as deficits in the attentional set shifting task [77]. This task is designed to reflect the same prefrontal mechanisms of the human intradimensional/extradimensional shift test or Wisconsin Card Sorting Task, procedures used to measure executive functioning in patients across the spectrum of NDDs [76,78]. Further, deficits in the novel object recognition task, a task often with high predictive and face validity to deficits seen in SZ [79] can be seen following mIA [33,80]. Additionally, diagnosis-specific phenotypes can be measured through specific tasks or attention to specific behaviours. Deficits in social preference have been seen following mIA [81–83] and can be used to reflect social withdrawal or negative symptoms of SZ [73], whereas the scoring of typical behaviours such as autogrooming could be used to reflect repetitive behaviour as found in ASD [84]. Endophenotypes such as PPI of the startle response are affected by mIA, mirroring the impairment seen in several neuropsychiatric disorders [85–87], further supporting the predictive and face validity of mIA model use. The putative mechanisms that link mIA-induced changes to offspring NDD susceptibility will be discussed further in the sections below.

## **mIA-induced cytokines as primary mediators of neurodevelopmental disorder; effects at the placental interface**

Against the backdrop of raised maternal cytokines and chemokines induced by mIA in response to maternal infection during pregnancy, there has been considerable research interest in trying to delineate the mechanisms by which such maternal immunomodulation influences fetal neurodevelopment to 'program' NDDs in the offspring [22]. There is a well-established appreciation that metabolic and physiological perturbations in the maternal environment are 'sensed' by various signalling mechanisms in the placenta, eliciting changes downstream in placental function, that serve to adapt to the altered maternal environment. This can result in disturbed fetal homeostatic balance, with the potential to influence fetal growth and development [88–90]. The gestational timing of exposure to 'stressors' will be an important determinant of changes invoked in placental development and function and the downstream impacts and subsequent developmental programming of the fetus [90].

Disturbed maternal cytokine balance, such as that evoked by mIA, has received considerable attention as cytokines function in the development of the placenta, as well as the immune and nervous systems and importantly, this involves a range of pro-inflammatory and anti-inflammatory cytokines [91–95]. Hence, cytokines are not only modulators of immune activity, but can also be regarded as critical autocrine and paracrine mediators that modulate signalling



between distinct non-immune tissues to regulate a diverse array of functions through the activation of various signal transduction cascades [91,94]. In this way, cytokine induction in response to maternal infection can adversely affect neurodevelopment [94], discussed further in the next section.

This environmental setting also leads us to consider whether stimulated maternal cytokine production arising from mIA results in cytokines crossing the placenta or affects placental function, especially functions such as placental nutrient uptake and fetal nutrient provision, as these have the potential to drive altered fetal brain development, whilst also providing precursors essential for neuromodulatory regulation [43,96–98]. Three possible scenarios seem plausible: (i) raised maternal cytokines cross the placenta to evoke changes in fetal development, (ii) raised maternal cytokines directly affect placental function with downstream fetal developmental impacts, and/or (iii) placental production of cytokines invokes signal transduction events that elicit changes in placental development and adaptation of placental function, with consequences for fetal development. We will now consider each of these possibilities, but they may not be mutually exclusive in eliciting effects at convergent functional loci.

## Do maternal cytokines cross the placenta?

To affect placental function, or indeed be able to cross the placenta, routes of influx of maternal cytokines into placental tissue must exist. Cytokines are postulated to enter and cross the placenta by simple diffusion through paracellular trans-trophoblastic water-filled channels, dependent on the permeability characteristics of the placenta [99], which may change over the course of pregnancy [100]. Indeed, fetal transfer of [ $^{125}$ I]IL-6 was significantly greater at mid-gestation than at late gestation in pregnant rats [99]. Yet, maternal [ $^{125}$ I]IL-1 $\beta$  showed minimal fetal transfer across rat placenta [101]. Maternal administration of [ $^{125}$ I]IL-2 to pregnant mice dams at mid-gestation demonstrated significant accumulation of the tracer in the fetuses, placenta and amniotic fluid, implicating transplacental transfer of IL-2 [102]. Recent studies in human placenta have identified trans-syncytial nanopores that connect directly the maternal- and fetal-facing sides of the syncytial epithelium of human placenta, the syncytiotrophoblast, which may provide a potential pathway for paracellular diffusion [103] and the passage of cytokines between the mother and her developing fetus. Therefore, these observations provide a putative transplacental route by which maternal cytokines can enter the fetal circulation [99,102] and potentially cross the fetal blood–brain barrier [104], which may also raise barrier permeability through changes to endothelial cell junction integrity and increased astrocyte damage [105,106], modifications likely to permit direct effects on fetal neurodevelopment. In this context, it is worth noting that mIA induced by LPS or poly(I:C) in rodent models has been reported to evoke relatively rapid (within a few hours) changes in the transcription of genes encoding pro-inflammatory cytokines such as IL-6, TNF $\alpha$  and IL-1 $\beta$  in the fetal brain ([44]; Table 1). Further evidence in support of the transplacental passage of maternal cytokines comes from studies showing that maternal [ $^{125}$ I]TGF- $\beta$ 1 in pregnant mice was detected in placental tissue and rapidly crossed the placenta to the fetus where it could be recovered from various fetal tissues such as liver, lung, bone and muscle in a time-dependent manner [107]. However, others have shown that in pregnant rat dams while maternally administered [ $^{125}$ I]TNF $\alpha$  is sequestered by the placenta, transfer to the fetus is negligible [108]. Other models have yielded inconsistent observations; for example, using the *in vitro* perfused human placenta model, IL-8 was not transferred [109], contrasting with IL-6 which demonstrated bidirectional transfer across the tissue [110], while others using this model have failed to find evidence of IL-6, TNF $\alpha$ , IL-1 $\beta$  or IL-1 $\alpha$  transfer [110,111].

## Do maternal cytokines directly affect placental function?

Irrespective of whether cytokines are transferred across the placenta, *in vitro* studies support direct effects of exogenous cytokines on placental nutrient transport function. For example, TNF $\alpha$  and IL-6 stimulate system A-mediated amino acid transporter activity in cytotrophoblast cells isolated from human placenta [112,113], through a MAPK-dependent pathway [112] and increased phosphorylation of signal transducer and activator of transcription 3 (STAT3) [113], respectively. Yet, neither IL-6 nor TNF $\alpha$  at comparable doses alter system L-mediated leucine uptake in the same cell type [113], showing specificity of action. Consistent with this notion, LPS and poly(I:C) stimulate system A activity, but do not affect system L activity in the same cell type [114]. In pregnant rat dams, an acute maternal injection of TNF $\alpha$  significantly reduced placental transport of the leucine analogue [ $^{14}$ C]cycloleucine [115]. In primary placental cell cultures from mice, treatment with TNF $\alpha$  decreased *Slc38a2* mRNA expression, which encodes SNAT2 transporter subtype of system A, but this effect was not observed with IL-1 $\beta$  [116], again highlighting the specificity of cytokine effects. Cultured human placental explants treated with IL-17A, IL-22 or IL-23, alone or in combination, altered the gene expression for candidate drug transporters in a selective manner [117]. Furthermore, the placenta expresses an array of cytokine receptors and interaction with these can induce a variety of signalling pathways that may alter placental growth and differentiation [92], thereby also affecting function. Indeed, we have recently

**Table 1** Changes in expression of inflammatory factors in fetal brain, placenta and other fetal compartments in response to mIA

| Fetal brain                                                                                                          | Placenta                                                                                                  | Other fetal compartment(s)                                   | Immunogen and dose (per kg bodyweight or dam) | Gestational day (GD) of administration | Species | Reference |
|----------------------------------------------------------------------------------------------------------------------|-----------------------------------------------------------------------------------------------------------|--------------------------------------------------------------|-----------------------------------------------|----------------------------------------|---------|-----------|
| ↑IL-6 (6 h)                                                                                                          |                                                                                                           |                                                              | Poly(I:C) 2.5 or 5 mg/kg i.p.                 | GD9                                    | Mouse   | [342]     |
|                                                                                                                      | ↑IL-6, IL-12p40, MCP-1 (CCL2), MIP-1β, RANTES (CCL5), KC (CXCL1) (2 h, 4 h)<br>↑IL-1β, IFNγ, MIP-1α (4 h) |                                                              | Poly(I:C) 4.5 mg/kg i.p.                      | GD16.5                                 | Mouse   | [133]     |
| ↓IL-1β (3 h), ↓IL-10 (3 h), ↑IL-6 (3 h, 6 h), ↑IL-1β (6 h), ↓mRNA for IL-1β (3 h), IL-10 (6 h)                       |                                                                                                           |                                                              | Poly(I:C) 5 mg/kg i.v.                        | GD9                                    | Mouse   | [343]     |
| ↑IL-1β, IL-10 (3 h), ↑IL-6 (6 h), ↓mRNA for IL-1β, TNFα (3 h), ↑mRNA for IL-6, IL-10, TNFα (6 h)                     |                                                                                                           |                                                              | Poly(I:C) 5 mg/kg i.v.                        | GD17                                   | Mouse   | [343]     |
| ↑IL-1β, IL-5, IL-4 (6 h)                                                                                             |                                                                                                           |                                                              | Poly(I:C) 5 mg/kg i.p.                        | GD9                                    | Rat     | [344]     |
| ↑IL-6 (3 h, GD12.5)                                                                                                  |                                                                                                           |                                                              | Poly(I:C) 5 mg/kg i.v.                        | GD12.5<br>GD17.5                       | Mouse   | [281]     |
| HMW: ↑IL-6, TNFα, CXCL1 (3 h)<br>LMW: ↑IL-6, TNFα, CXCL1 (3 h)                                                       | HMW: ↑IL-1β, IL-6, IL-10, IL-17a, TNFα, CXCL1, MCP-1 (3 h)<br>LMW: ↑IL-6, CXCL1, MCP-1 (3 h)              |                                                              | Poly(I:C) 5 mg/kg i.v. (HMW and LMW)          | GD12                                   | Mouse   | [61]      |
| ↑mRNA for IL-6 (6 h)                                                                                                 | ↑mRNA for IL-6, TNFα (6 h, 48 h)                                                                          |                                                              | Poly(I:C) 10 mg/kg i.p.                       | GD14                                   | Rat     | [96]      |
|                                                                                                                      | ↑mRNA for IL-6 (3h), TNFα (3 h, 24 h), ↓mRNA for IL-1β (24 h)                                             | ↑mRNA for TNFα (3 h, 24 h), IL-6 (24 h) in visceral yolk sac | Poly(I:C) 10 mg/kg i.p.                       | GD15                                   | Rat     | [43]      |
| ↓MIP-1α (6 h), ↑MIP-1α (24 h), ↑IP-10 (CXCL10) (6 h, 24 h), ↑IL-7 (6 h), ↑IL-13, (6 h), ↑IL-1β (24 h), ↑MCP-1 (24 h) |                                                                                                           |                                                              | Poly(I:C) 20 mg/kg i.p.                       | GD16                                   | Mouse   | [345]     |
| ↑CXCL10, CCL5 (6 h)                                                                                                  | ↑CXCL10, CXCL12 (6 h)                                                                                     |                                                              | Poly(I:C) 20 mg/kg s.c.                       | GD12.5                                 | Mouse   | [346]     |
| ↑IL-12p40 (48 h)                                                                                                     | ↑IL-6, TNFα, IL-12p40 (48 h)                                                                              |                                                              | Poly(I:C) 20 mg/kg i.p.                       | GD12                                   | Mouse   | [347]     |
|                                                                                                                      | ↑TNFα (2 h)                                                                                               | ↑TNFα in liver/spleen (2 h)                                  | Poly(I:C) 10 or 20 mg/kg i.p.                 | GD16                                   | Rat     | [348]     |
| ↑mRNA for IL-6 (3 h)                                                                                                 | ↑IL-6 (3 h, 6 h, 24 h)<br>↑mRNA for IL-6, TNFα (3 h)                                                      |                                                              | Poly(I:C) 20mg/kg i.p.                        | GD12.5                                 | Mouse   | [134,138] |
| ↑mRNA for IL-1β (6 h), IL-6 (2 h), MCP-1 (2 h, 6 h)                                                                  |                                                                                                           |                                                              | LPS 50 μg i.p.                                | GD18                                   | Mouse   | [349]     |
| ↑mRNA TNFα, IL-1β (6 h)                                                                                              | ↑mRNA for IL-1β, IL-6, TNFα (6 h)                                                                         |                                                              | LPS 50 μg/dam                                 | GD15                                   | Mouse   | [330]     |
| ↑mRNA TNFα, IL-1β (6 h)                                                                                              | ↑mRNA for IL-1β, IL-6, TNFα (6 h)                                                                         | ↑IL-6 in amniotic fluid (6 h)                                | LPS 50 μg/dam                                 | GD18.5                                 | Mouse   | [350]     |
|                                                                                                                      | ↑TNFα (2 h), IL-1β (4 h, 8 h), IL-6 (8 h)                                                                 | ↑IL-1β in fetal plasma (4 h)                                 | LPS 50 μg/kg i.p.                             | GD18                                   | Rat     | [66]      |
| ↑TNFα, MCP-1 (CCL2), IL-6, NFκβ (4 h)                                                                                |                                                                                                           |                                                              | LPS 100 μg/kg i.p.                            | GD18                                   | Rat     | [351]     |

Continued over

**Table 1** Changes in expression of inflammatory factors in fetal brain, placenta and other fetal compartments in response to mIA (Continued)

| Fetal brain                                                                                                                  | Placenta                                                                                | Other fetal compartment(s)                                                  | Immunogen and dose (per kg bodyweight or dam) | Gestational day (GD) of administration | Species                           | Reference |
|------------------------------------------------------------------------------------------------------------------------------|-----------------------------------------------------------------------------------------|-----------------------------------------------------------------------------|-----------------------------------------------|----------------------------------------|-----------------------------------|-----------|
|                                                                                                                              | ↑mRNA for IL-1β (12 h), IL-6 (6 h, 12 h), TNFα (1 h, 6 h, 12 h)                         | ↑IL-1β (1 h, 6 h, 12 h) IL-6 (6 h, 12 h), TNFα (1 h, 6 h) in amniotic fluid | LPS 100 μg/kg i.p.                            | GD18                                   | Rat                               | [64]      |
| ↑IL-6 (3 h)                                                                                                                  |                                                                                         |                                                                             | LPS 120 μg/kg i.p.                            | GD17                                   | Mouse                             | [352]     |
| ↑IL-1β, IL-2, IL-5, IL-18 (6 h), ↑IL-6, ↓IL-4, IL-18 (12 h), ↑IL-1β, IL-6, TNFα, IL-2, IL-4, IL-5, IL-7, IL-10, IL-18 (24 h) |                                                                                         |                                                                             | LPS 250 μg /kg i.p.                           | GD15                                   | Rat                               | [353]     |
| ↑mRNA for IL-1β (1 h, 4 h, 24 h, 48 h), ↑mRNA for TNFα (1 h, 4 h, 24 h), ↑mRNA for iNOS (24 h, 48 h)                         | ↑mRNA for IL-1β, TNFα, IL-6 (4 h, 24 h, 48 h) ↑mRNA for iNOS, MCP-1 (CCL2) (24 h, 48 h) | ↑IL-6, TNFα in amniotic fluid (4 h, 24 h)                                   | LPS 500 μg or 1 mg/kg i.p.                    | GD18                                   | Rat                               | [354,355] |
|                                                                                                                              | ↑IL-6, TNFα, IL-1β (2 h, 8 h)                                                           | ↑IL-6 in amniotic fluid (2 h, 8 h)                                          | LPS 500 μg/kg i.p.                            | GD16                                   | Rat                               | [356]     |
| ↑TNFα (1.5 h)                                                                                                                |                                                                                         | ↑TNFα in liver and amniotic fluid (1.5 h)                                   | LPS 500 μg/kg i.p.                            | GD17                                   | Mouse                             | [357]     |
| ↓TNFα (2 h)                                                                                                                  | ↑IL-6, TNFα (2 h)                                                                       | ↑TNFα in amniotic fluid (2 h)                                               | LPS 2.5 mg/kg i.p.                            | GD16                                   | Rat                               | [356]     |
|                                                                                                                              | ↑IL-6, TNFα (6 h) at GD16, ↑TNFα (6 h) at GD20                                          |                                                                             | LPS 1 or 10 mg/kg for 6 h                     | GD16 GD20                              | Rat placental explant (secretion) | [358]     |

**Abbreviations:** CCL, C-C motif chemokine ligand; CXCL, C-X-C motif chemokine ligand; HMW, high molecular weight; IP, interferon gamma-induced protein; i.v., intravenous; i.p., intraperitoneal; IL, interleukin; iNOS, inducible nitric oxide synthase; LMW, low molecular weight; MIP, macrophage inflammatory protein; NF-κβ, nuclear factor kappa β; MCP-1, monocyte chemoattractant protein-1; s.c., subcutaneous; TNFα, tumour necrosis factor α; ↑ or ↓ indicates increased or decreased expression respectively.

shown that mIA-induction by poly(I:C) in a rat model results in reduced placental weight, increased fetal/placental weight ratio, and altered transplacental leucine transport [43].

This latter observation is of particular interest as system L activity, which mediates the placental transport of leucine, also transports the amino acid tryptophan [118], the precursor for serotonin (5-hydroxytryptamine) synthesis [98,119]. This mechanism has developmental importance as some of the maternal tryptophan taken up by the placenta is converted to serotonin by placental tryptophan hydroxylase (TPH1) activity, providing an exogenous source of serotonin for fetal neurodevelopment [98,119]. In mice, placental serotonin synthesis capacity is greater in the earlier gestational period, with the converse apparent in fetal brain [119], revealing a progressive developmental switch from an early dominant placental exogenous source of serotonin to a later endogenous source synthesized by the brain [120]. The human placenta also demonstrates serotonin synthesizing capacity in the first trimester, highlighting the importance of this placental source of serotonin for fetal neurodevelopment across species [119]. Further, some elegant placental perfusion experiments demonstrated that placental-synthesized serotonin can be released into the fetal circulation, confirming this pathway is crucial to maintain normal levels of serotonin for early fetal forebrain development over a time period coincident with cortical neurogenesis, migration and initial axon targeting [119,120]. Following poly(I:C) induction of mIA and raised maternal IL-6, placental TPH1 activity was significantly increased, concomitant with significantly increased fetal forebrain serotonin concentration, and suppression of serotonergic axon outgrowths within the fetal forebrain [98]. Importantly, placental production and release of serotonin was significantly greater in the poly(I:C)-treated group as compared to saline-treated controls [98], providing a mechanism whereby maternal inflammation during pregnancy can influence fetal brain development through placental-mediated changes in serotonin-synthesizing function. Taken together, these observations implicate direct effects of cytokines on placental function.

## Does placental endogenous production of cytokines affect placental function?

It is important to note that within the setting of mIA, vertical transmission of pathogen across the placenta is not a prerequisite for altered placental cytokine concentration. For example, both human and animal studies have shown that the influenza virus, or indeed antibodies produced to it, do not cross the placenta nor are found in the brains of offspring of exposed mothers [121–123]. While induction of mIA using infective pathogens such as influenza have shown that placental development is impaired, with an increased number of inflammatory cells within the placenta, as well as altered expression of placental genes associated with NDDs, inflammation and immune response [122]. Delineation of the inflammatory and cytokine effects at the locus of the placental/fetal interface have been greatly aided by the widely applied use of non-infective mimetics such as LPS and poly(I:C) in rodent models to induce mIA (which, as already discussed, have good model validity). From such studies, there is evidence of rapidly altered cytokine concentrations apparent in various fetal compartments including placenta, amniotic fluid and fetal brain ([31]; Table 1). It is worth emphasizing that across the maternal-fetal interface, the magnitude and direction of cytokine (and chemokine) changes induced by mIA in maternal plasma, is not necessarily mirrored by that seen in the placenta or fetal brain [61], which may argue for local regulation of fetal endogenous cytokine synthesis, with the potential to affect neurodevelopmental events and increase NDD risk [44].

In the aforementioned rodent models, LPS and poly(I:C) are used as ligands for TLR4 and the endosomal TLR3, respectively [124]. Human and rodent placentas express both of these receptors [125–131], from early in pregnancy, along with other TLRs [126]. LPS- or poly(I:C)-mediated mIA induction in rodent models leads to up-regulated placental TLR4 or TLR3 placental expression respectively [128–130], stimulated placental cytokine gene expression, increased placental cytokine concentration, and altered fetal brain cytokine gene expression and concentration (Table 1), together with altered placental expression of different classes of amino acid transporters and their activity [43,96,97]. Collectively, together with other placental changes, these are likely to lead to a disturbed fetal physiological milieu, and the genesis of neurodevelopmental changes with impacts on NDD risk susceptibility [43,44,132].

Although the placenta has the capacity to synthesize a wide variety of cytokines [91,133], some elegant studies by Hsiao and Patterson [134] demonstrated that when the ability of placental trophoblast cells (i.e. fetal cells) to produce IL-6 was abolished by *Il6* gene ablation in mice, the acute rise in placental IL-6 concentration following mIA induction by poly(I:C) (Table 1) persisted; hence this was not contributed to by fetal trophoblast cell synthesis, but rather by maternal-derived IL-6 produced from activated maternal immune cells within the placenta. This inference was also confirmed by the negligible placental IL-6 response in *Il6* null-dams [134]. The increase in placental IL-6 concentration led to the activation of STAT3 signalling pathway within the spongiotrophoblast cells of the placental JZ, resulting in reduced expression of placental-specific hormones such as insulin-like growth factor 1 (IGF-1) and growth hormone (GH) [134] that regulate placental development, placental nutrient transporter activity and fetal growth, along with nutrient partitioning to the fetus [135–137]. While IL-6 appears to be a key player in the etiopathology of NDDs, as shown by a lack of behavioural deficits seen in poly(I:C)-treated *Il6* knockout mice, or when endogenous IL-6 activity is blocked by neutralization with a targeted antibody [86], it is likely that there is a more complex, temporal-dependent, and integrative influence of multiple cytokines induced by the mIA response (Table 1). For instance, we have recently shown that the offspring of poly(I:C)-treated dams showed early behavioural and adult cognitive deficits that were correlated to the maternal systemic TNF $\alpha$  response [77]. That said, many mIA-associated transcriptional changes found in the offspring's brain necessitate maternal IL-6 synthesising capacity [138] and are largely normalised by IL-6 targeting antibody [86], indicating a key dependence on maternal IL-6, which might be subsequent to the temporality of TNF $\alpha$  and IL-1 $\beta$  elicited effects [66]. Furthermore, there is also a reliance on signalling through the placental trophoblast receptor for IL-6 (IL-6R $\alpha$ ), with mIA-induced inflammatory signalling responses through the STAT3 pathway and expression of inflammatory genes in fetal brain dependent on its activation, along with the manifestation of behavioural abnormalities in the offspring [138].

## Placental programming of neurodevelopmental disorders

Hence, together these studies reveal that the elicited maternal mIA response undergoes signal transduction at the locus of fetal trophoblast cells within the placenta to evoke paracrine effects that modulate trophoblast cell function within the placenta. This leads to downstream activation of placental signalling pathways with impacts on placental function, causing perturbed fetal homeostasis. This, in turn, causes activation of several signalling cascades within the fetal compartment that 'prime' for dysregulated fetal immune function and the induction of aberrant fetal brain signalling events, leading to altered fetal neurodevelopmental trajectory and ensuing developmental programming of behavioural deficits in the offspring. In this way, the mechanistic linkage pathway can be viewed as stimulated



maternal pro-inflammatory cytokines ('sensors') in response to environmental insults (infection), leads to associated increases in pro-inflammatory cytokines in the placenta and fetal brain ('transducers'), resulting in altered fetal behavioural outcomes ('effectors') [139].

While such a scheme is likely to be somewhat of an oversimplification of the convergence of molecular events that drive NDDs, it places placental responses to mIA as a key mediator of mechanistic importance in the etiopathology of NDDs. Hence, the 'placental programming of NDDs' paradigm has gained widening appreciation. In this framework, various maternal environmental stressors, including maternal inflammation, converge on neurologic disease through the integrated placental response to a diverse range of maternal signals that evoke adaptive/maladaptive changes in both the placenta and the developing brain, modulated by epigenetic changes [44,139–142]. Indeed, a variety of maternal stressors that evoke a stimulated maternal immunogenic response produce histological, transcriptional and behavioural manifestations in the offspring brain that are similar to those seen in LPS and poly(I:C) mIA models, implying a degree of convergence at the level of mediating molecular mechanisms [139]. In this context it is interesting to note that others have drawn attention to the notion that critical developmental processes in the placenta and fetal brain appear to be governed by the same environmental cues, emphasizing the close regulatory 'cross-talk' between these two tissues, with such developmental synchronization disrupted by maternal metabolic stress and the adaptations invoked by the placenta [143]. It is also noteworthy that a group of SZ risk-associated genes are highly expressed in the placenta during early life and are modulated by biological stress, leading to the notion that genetic variants associated with SZ are convergent on a developmental trajectory that affects placental responses to stress [144].

In the subsequent sections, we elaborate further on the mechanisms of cytokine-mediated modulation of neurodevelopment and relate findings to neurodevelopmental outcomes in the context of the recent SARS-CoV2 pandemic in the final section.

## **Cytokines and inflammation in neurodevelopmental disorders**

### **Cytokines in brain development**

Normal brain development begins early post-conception and continues into early adulthood, comprising various processes organised both spatially and temporally [145,146]. Early stages of brain development occur with neural tube convergence and patterning and proliferation of neuroepithelial cells which transition to radial glial cells, the essential neural progenitor cells (NPCs). Proliferation and differentiation of NPCs into neurons (neurogenesis) then occurs in the ventricular zone (VZ) and subventricular zone (SVZ). Neurogenesis is followed by gliogenesis, the production of astrocytes and oligodendrocytes. Finally, myelination, synaptic sculpting and modulation of circuitry networks occur in the postnatal period [145–147]. This creates a relatively large temporal window during which the brain is vulnerable to developmental perturbations [148]. As already alluded to, prenatal and early life insults, notably mIA and placental dysfunction, are thought to induce inflammatory signalling pathways, in particular cytokine signalling pathways, in the fetal brain which are hypothesised to disturb normal neurodevelopmental trajectories and predispose individuals to neuropathology [149–152]. This is underscored by the properties of cytokines acting as critical signalling molecules during normal brain development [153]. Early work showed that cytokines are present in the early fetal brain and that their concentrations corresponded with critical developmental stages [154]. Subsequently, cytokines were shown to regulate various neurodevelopmental processes, and that disturbances in the normal temporal pattern of brain cytokines profiles have the potential to cause dysregulation of these processes and thus disturb neurodevelopment both prenatally and during postnatal brain development [155–157]. In line with this hypothesis, several studies have evaluated changes in cytokine expression and neuroinflammatory markers in the developing brain of offspring following mIA and reported ongoing elevations in pro-inflammatory cytokine (notably, IL-6, TNF $\alpha$  and IL-1 $\beta$ ) expression in both the fetal and postnatal brain ([44,62]; Table 1). Of note, persistent neuroinflammation has also been identified in the brains of individuals with NDDs [158,159] lending weight to the role of these signalling molecules in the pathology of NDDs.

### **Neurogenesis and neuronal migration**

Neurogenesis is the process of proliferation and differentiation of NPCs to give rise to neurons [160]. These newly generated neurons then migrate outwards into the cortical layers. *In vivo* perturbation of neurogenesis and neuronal migration leads to various behavioural patterns analogous to those observed in NDDs [161,162]. Neurogenesis has been shown to be both increased and inhibited by individual cytokine signalling pathways [156]. Cytokine imbalances as a result of prenatal insults, notably changes in the IL-6 family of neuropoietic cytokines, could therefore disturb the NPC proliferation rates and the temporal regulation of neurogenesis, and in turn disturb the normal neuronal

pools within the cortical layers [153,156,163]. Further, cytokines, notably pro-inflammatory IL-1 $\beta$ , and chemokines have also been shown to influence neuronal migration [94,164]. Notably, chemokines have been demonstrated to act as a chemoattractant within the cortical surface layers, working to regulate the positional migration of neurons. As with neurogenesis, *in vivo* inhibition of these signalling pathways has been shown to cause cortical dysregulation and mis-patterning [94,165,166]. These disturbances are likely to contribute to incorrect neuronal ratios and signalling in the postnatal and developing brain.

### **Gliogenic switch**

Following neurogenesis there is a temporal switch to gliogenesis, the production of first astrocytes and then oligodendrocytes from the NPC pool. These sequential fate switches are dependent on key signalling pathways and SVZ patterning [145,146]. Similar to neurogenesis, gliogenic switches are regulated by the IL-6 family of neurotrophic cytokines through the temporal induction of distinct astroglial and oligodendroglial progenitor cell markers in the SVZ NPC pool [167,168]. Hence, pro-inflammatory signalling within the fetal brain, particularly IL-6, has the potential to dysregulate these temporal cell fate decisions by promoting an early gliogenic switch, thereby reducing the neuronal pool. Indeed, abnormal gliogenesis and glial cell ratios have been shown to be risk factors for NDDs [169,170].

### **Oligodendrocyte maturation and myelin plasticity**

Oligodendrocytes are the primary myelinating cells in the brain that arise from oligodendrocyte progenitor cells (OPCs) around the time of birth [171]. These cells are responsible for axon ensheathment and formation of the major white matter tracts. Critically, OPCs persist throughout life and maintain the capacity to differentiate in mature oligodendrocytes. This progenitor pool therefore aids in neural plasticity and the need for remyelination through development. Proinflammatory cytokines have been shown to inhibit OPC proliferation and survival and hence reduce myelin plasticity in the developing brain [172,173]. Myelin plasticity is critical for normal neuronal signalling and protection of neurons from damage in later-life, with disturbed myelin plasticity present in various NDDs [174]. Further, neuroinflammation can cause damage to myelin sheaths, leading to demyelination along with axon and synaptic damage, preventing normal neuronal signalling [175].

### **Microglia and astrocyte activation and their role in neuroinflammation**

Cytokine expression in both the prenatal and postnatal brain is primarily isolated to microglia and astrocytes; hence these cells are thought to be critical in mediating the outcomes of any downstream output of cytokines and inflammatory signalling [153,176].

Microglia represent the resident immune cells of the brain responsible for mediating inflammatory processes and arise from yolk sac progenitor cells in early development [177,178]. Inflammation and stress activate microglial cells, promoting the secretion of cytokines to induce a neuroinflammatory phenotype [179,180]. Activation of microglia and the stimulated production of neuroinflammatory cytokines has a negative impact on the expression of neurotrophins such as brain-derived neurotrophic factor (BDNF) [181,182]. BDNF plays a key role in neurodevelopment [183,184], being essential for learning, cognitive and memory functions [185]. Microglial-derived BDNF influences synaptic plasticity [186] and a reduced expression of BDNF associates with altered behaviours and cognitive deficits [182,187]. Offspring of mIA-affected mothers have been shown to exhibit reduced BDNF expression [188–190], which may link to altered behaviours observed in adulthood [189,190]. BDNF downstream signalling may also influence the expression of various synaptic protein targets, thereby affecting synaptic function [184]. Microglia are also responsible for the phagocytosis of cell and myelin debris and synapses, a process critical for normal synaptic connectivity during development [178,191]. Hence, excess microglial activity as a result of inflammation can lead to excess synaptic cleavage and neuronal damage as well as perpetuating ongoing neuroinflammation leading to altered function.

Astrocytes represent a diverse group of cells within the brain, and they function in synapse formation, neurotransmission and metabolism throughout development [192]. Astrocytes are also susceptible to activation by cytokine signalling and active microglia leading to reactive astrogliosis [193]. This is accompanied by a functional change during which astrocytes begin to proliferate and secrete pro-inflammatory mediators which can cause damage and synaptic loss, with a seemingly preferential loss of inhibitory  $\gamma$ -aminobutyric acid (GABA)ergic synapses [194].

In line with their roles in neuroinflammation, increased microglial activity [158,195,196] and astrocyte abnormalities [197,198] have been identified in various NDDs. Moreover, such abnormalities in the developing brain of offspring exposed to mIA were often sex-specific [199–201]. Synaptic loss from microglial and astrocyte activation as a result of neuroinflammation is thought to contribute to the excitatory/inhibitory (E/I) imbalance [194] frequently reported in NDDs, thereby contributing to behavioural abnormalities [202,203].

## Neuronal signalling and neuroinflammation

As already outlined, neurodevelopment is a highly regulated process with precise spatial and temporal benchmarks with prenatal and postnatal neuroinflammation causing various neuronal signalling dysfunctions. Analysis of gene expression after infection with influenza, poly(I:C) or IL-6 injection in early neurodevelopment in rodent models indicated common patterns of change in gene expression relevant to neurogenesis and neuroprotection in the acute phase of infection [204]. Indeed, there are many mIA studies with evidence of decreased neurogenesis or cell survival in fetal, juvenile and adult brain (Table 2). Interestingly, as shown in Table 3, markers of cell death appear absent in animals exposed to mIA in early development (gestational day (GD)8-13.5) but present in offspring exposed in late gestation (GD15-20) in both prenatal and postnatal tissue, which again serves to highlight the developmental dependency of neurodevelopmental responses arising from mIA exposure.

### Parvalbumin interneurons

The aforementioned neurodevelopmental impacts of mIA and neuroinflammation that result in altered neurogenesis, degradation of extracellular matrices and myelin sheaths, the activation of glial cells and altered cell survival and death, together, constitute disturbances which are likely to influence E/I balance in the developing brain. E/I balance is crucial for healthy brain function, and there is a wealth of evidence that mIA can cause dysregulation of E/I balance [205–209]. GABAergic inhibitory interneurons are critical regulators of this balance, and crucially, several studies have shown impaired function in several NDDs [205–212]. More specifically, parvalbumin interneurons (PVI) are considered critical in maintaining E/I balance [213]. Although important for E/I balance, PVI may be uniquely sensitive to E/I input changes due to the two types of PVI that form during development. Donato et al. [214] identified early- and late-gestational subtypes of PVI, whose plasticity is regulated by excitatory and inhibitory inputs, respectively. Thus, in disorders with reduced excitatory input to early-generated PVI, like SZ, there will be reduced gamma band activity and impaired memory. In disorders with reduced inhibitory input to late-generated PVI, like autism and intellectual disability, there will be impaired plasticity [214]. Therefore, PVIs are sensitive to mIA throughout neurodevelopment and are affected by E/I balance shifts in both directions.

PVI express parvalbumin protein, a calcium buffer first detected in the rodent brain in the second postnatal week, after which its expression steadily increases into adulthood [215–218]. Several studies have investigated the effect of mIA on PVI number or parvalbumin gene expression (Table 4). Considering the outcomes of these studies, it appears early gestation mIA (GD9-12.5) can reduce PVI in juvenile [219,220] and adult offspring [34,220–223]. Although, two studies showed no difference in PVI density [224] or mRNA expression [225] during this period. The data from the next developmental window (GD13-15) is more varied, with some studies showing that mIA decreases parvalbumin mRNA [188], others showing no effect on PVI number [188,226], and a final study seeing an increase in PVI density in the barrel cortex of postnatal day (PD)20 offspring [226]. This variability may be explained by mIA in this gestational period having little effect on proliferation of medial ganglionic eminence-derived neurons, instead altering migration [227–230]. Finally, several studies showed that late gestation exposure to mIA (GD15-19) resulted in decreased PVI cell density, parvalbumin protein and mRNA [222,231–234], while others saw trends only towards decreases [234,235] or no change [236]. The brain region and age studied throughout these studies are inconsistent, so although a firm conclusion cannot be drawn, it is valuable to draw attention to the parallels between the apparent biphasic vulnerability and the biphasic genesis of PVI [214].

It has also been hypothesised that reduced parvalbumin protein is a compensatory mechanism to adjust to the reduced GABA availability [237]. In keeping with this postulate, several studies have shown a reduction in glutamic acid decarboxylase (GAD)67 or GAD65 enzymes required for GABA synthesis from glutamate [238], in fetal [225,228] and adult tissue [234,236,239–244]. However, some studies in younger offspring (<PD60) showed increases [240,244–246]. Consistent with this conflicting data for GAD, there is evidence of mIA causing increased excitation and reduced inhibition [226,232,239,247–251] and the contrary imbalance [226,250,251]. It is essential to comment on the diversity of regions used to measure these outcomes and to appreciate that excessive inhibition in one brain region may lead to increased excitation in another. The primary finding is the disruption to the E/I balance, which, when intentionally manipulated through the optogenetic stimulation of excitatory neurons or reducing the activity of PVI, can recapitulate the mIA-induced behaviours [221]. Together, these observations implicate a role for dysregulated PVI activity in the etiopathology of NDDs.

## The role of epigenetics in neurodevelopmental disorders

Epigenetics refers to changes in gene functional activity that occur independently to changes in the DNA sequence through DNA modifications such as methylation, histone modifications and post-translational modifications to the

**Table 2** The effect of mIA on neurogenesis and cell survival in prenatal and postnatal brains

| Gestational day                   | mIA induction method | Region investigated | Age of offspring measurement | Measure                                         | Change                                                                                        | Reference |
|-----------------------------------|----------------------|---------------------|------------------------------|-------------------------------------------------|-----------------------------------------------------------------------------------------------|-----------|
| Transgenic overexpression of IL-6 | IL-6                 | DG                  | PD84-112                     | 24 h after BrdU                                 | ↓ granule cell layer                                                                          | [359]     |
|                                   |                      |                     | PD115-143                    | 31 days after BrdU NeuN                         | ↓ granule cell layer<br>↓ BrdU/NeuN in granule cell layer                                     |           |
| 8, 10 + 12                        | LPS                  | CA1                 | PD84<br>PD280<br>PD560       | Cell number                                     | ↓<br>↓↓<br>↓↓↓ (age-dependent decrease)                                                       | [360]     |
| 8, 10 + 12                        | IL-6                 | CA1                 | PD168                        | Nissl stain                                     | ↔ in males<br>↓ in females                                                                    | [361]     |
|                                   |                      | CA2                 |                              |                                                 | ↓ in males<br>↔ in females                                                                    |           |
|                                   |                      | CA3                 |                              |                                                 | ↓ in males<br>↔ in females                                                                    |           |
|                                   |                      | Hilus               |                              |                                                 | ↓ in males<br>↓ in females                                                                    |           |
| 9                                 | Poly(I:C)            | DG                  | PD24                         | DCX                                             | ↓ in subgranular layer and outer granular layer                                               | [343]     |
| 10.5                              | LPS                  | DG                  | PD22                         | BrdU on PD21                                    | ↓                                                                                             | [362]     |
|                                   |                      |                     | PD91                         | BrdU on PD90                                    | ↓                                                                                             |           |
| 13.5                              | LPS                  | VZ                  | GD14                         | pH3 BrdU to dam 2 h post LPS                    | ↓ pH3 and BrdU                                                                                | [363]     |
|                                   |                      |                     | GD15.5                       |                                                 | ↔ pH3 and BrdU                                                                                |           |
| 14, 16, 18 + 20                   | LPS                  | DG                  | PD67                         | BrdU on PD 60-67 NeuN DCX                       | ↓ BrdU<br>↓ BrdU/NeuN<br>↓ DCX<br>↓ BrdU/DCX                                                  | [364]     |
|                                   |                      |                     | PD97                         |                                                 | ↓ BrdU<br>↓ BrdU/NeuN                                                                         |           |
| 15 + 16                           | LPS                  | DG                  | PD23                         | BrdU 4 h after last LPS injection               | ↔                                                                                             | [365]     |
|                                   |                      |                     | PD14                         | BrdU 2 h before cull                            | ↓                                                                                             |           |
|                                   |                      |                     | PD42                         | BrdU on PD14                                    | ↓                                                                                             |           |
|                                   |                      |                     | PD60                         | BrdU 2 h before cull                            | ↔                                                                                             |           |
| 15                                | LPS                  | Cortex              | PD88                         | BrdU on PD60                                    | ↔                                                                                             | [228]     |
|                                   |                      |                     | GD15 (+4 hours after LPS)    | mRNA /pathway analysis                          | ↓ mRNA for genes relevant to neurogenesis                                                     |           |
| 15                                | Poly(I:C)            | DG                  | PD196                        | BrdU (PD unknown)                               | ↓                                                                                             | [232]     |
| 15                                | Poly(I:C)            | DG                  | PD37                         | BrdU on PD 14 16                                | ↓                                                                                             | [231]     |
|                                   |                      |                     | PD57                         | BrdU on PD 34 36                                | ↓                                                                                             |           |
|                                   |                      |                     | PD72                         | BrdU on PD 49 51                                | ↔                                                                                             |           |
|                                   |                      |                     | PD100                        | BrdU on PD 77 79                                | ↔                                                                                             |           |
| 15                                | Poly(I:C)            | DG                  | PD90                         | BrdU (PD57-59)<br>Ki67<br>Nestin<br>DCX<br>NeuN | ↓ Ki67<br>↓ Ki67/DCX<br>↔ Ki67/Nestin<br>↓ BrdU<br>↓ BrdU/DCX<br>↔ BrdU/Nestin<br>↓ BrdU/NeuN | [366]     |
| 16, 18 + 20                       | IL-6                 | CA1                 | PD168                        | Nissl stain                                     | ↔ in males<br>↓ in females                                                                    | [361]     |
|                                   |                      | CA2                 |                              |                                                 | ↓ in males<br>↔ in females                                                                    |           |

Continued over



**Table 2 The effect of mIA on neurogenesis and cell survival in prenatal and postnatal brains (Continued)**

| Gestational day | mIA induction method | Region investigated | Age of offspring measurement | Measure                           | Change                        | Reference |
|-----------------|----------------------|---------------------|------------------------------|-----------------------------------|-------------------------------|-----------|
|                 |                      | CA3                 |                              |                                   | ↓ in males<br>↓ in females    |           |
|                 |                      | Hilus               |                              |                                   | ↓ in males<br>↓ in females    |           |
| 16              | Poly(I:C)            | Cortex              | GD18                         | BrdU on GD16                      | ↓                             | [367]     |
| 17              | Poly(I:C)            | DG                  | PD24                         | DCX                               | ↓ outer granular layer        | [343]     |
| 18              | Poly(I:C)            | DG                  | PD28                         | BrdU on PD 27-28<br>DCX           | ↓ BrdU<br>↓ BrdU/DCX<br>↓ DCX | [368]     |
| 18 + 19         | LPS                  | DG                  | PD26                         | BrdU 4 h after last LPS injection | ↓                             | [365]     |
|                 |                      |                     | PD14                         | BrdU 2 h before cull              | ↔                             |           |
|                 |                      |                     | PD42                         | BrdU on PD14                      | ↓                             |           |
|                 |                      |                     | PD60                         | BrdU 2 h before cull              | ↔                             |           |
|                 |                      |                     | PD88                         | BrdU on PD60                      | ↔                             |           |

**Abbreviations:** BrdU, bromodeoxyuridine; CA1, CA1 area of the hippocampus; CA2, CA2 area of the hippocampus; CA3, CA3 area of the hippocampus; DCX, doublecortin; DG, dentate gyrus; GD, gestational day; IL-6, interleukin-6; LPS, lipopolysaccharide; NeuN, neuronal nuclei; PD, postnatal day; pH3, phospho-histone H3; VZ, ventricular zone; ↓, ↔, indicates decrease, or no significant change, respectively.

**Table 3 The effect of mIA on neural cell death**

| Gestational day | mIA induction method | Region investigated                                       | Age of offspring measurement | Measure                | Change                                    | Reference |
|-----------------|----------------------|-----------------------------------------------------------|------------------------------|------------------------|-------------------------------------------|-----------|
| 8, 10 + 12      | IL-6                 | Hippocampus                                               | PD28                         | Caspase-3              | ↔ in males<br>↔ in females                | [361]     |
|                 |                      |                                                           |                              | Procaspase-3           | ↔ in males<br>↔ in females                |           |
|                 |                      |                                                           | PD168                        | Caspase-3              | ↔ in males<br>↔ in females                |           |
| 9.0             | Poly(I:C)            | DG                                                        | PD24                         | Caspase-3              | ↔                                         | [343]     |
| 9.5             | Poly(I:C)            | S1 / M1                                                   | GD17.5, PD3, PD6             | Caspase-3              | ↔                                         | [227]     |
| 13.5            | LPS                  | Cortex                                                    | 8 h after LPS                | TUNEL assay/Caspase -3 | ↔                                         | [363]     |
| 15              | LPS                  | Cortex                                                    | GD15 (4 h after LPS)         | mRNA /pathway analysis | ↑ cellular stress and cell death pathways | [228]     |
| 16              | Poly(I:C)            | Cortex                                                    | GD18                         | Caspase-3              | ↑                                         | [367]     |
| 16, 18 + 20     | IL-6                 | Hippocampus                                               | PD28                         | Caspase-3              | ↔ in males<br>↑ in females                | [361]     |
|                 |                      |                                                           |                              | Procaspase-3           | ↔ in males<br>↑ in females                |           |
|                 |                      |                                                           | PD168                        | Caspase-3              | ↑ in males<br>↑ in females                |           |
| 17              | Poly(I:C)            | DG                                                        | PD24                         | Caspase-3              | ↑                                         | [343]     |
| 19 + 20         | LPS                  | Subventricular striatal zone                              | PD1                          | Caspase-3              | ↑                                         | [369]     |
|                 |                      | Periventricular striatum and germinative ventricular zone | PD7                          |                        | ↑                                         |           |
|                 |                      | Periventricular striatum                                  |                              | TUNEL assay            | ↑                                         |           |

**Abbreviations:** DG, dentate gyrus; GD, gestational day; LPS, lipopolysaccharide; M1, motor cortex; PD, postnatal day; S1, somatosensory cortex; TUNEL, terminal deoxynucleotidyl transferase dUTP nick end labelling; ↑, ↔, indicates increase, or no significant change, respectively.

histone proteins within the DNA chromatin structure, and non-coding RNA [139]. Together, these epigenetic modifications regulate gene expression changes in response to a perturbed physiological environment induced by various environmental stressors [252]. Of note, changes to the epigenome can be caused by acute as well as longstanding

**Table 4** The effect of mIA on parvalbumin levels in the postnatal brain

| Gestational day | mIA induction method | Region investigated                       | Age of offspring measurement | Method of measurement        | Change                                            | Reference |
|-----------------|----------------------|-------------------------------------------|------------------------------|------------------------------|---------------------------------------------------|-----------|
| 9               | Poly(I:C)            | CA1                                       | PD21                         | IHC                          | ↓                                                 | [219]     |
| 9               | Poly(I:C)            | Hippocampus                               | PD70                         | IHC                          | ↔                                                 | [223]     |
| 9-11            | Poly(I:C)            | DH                                        | PD168                        | qPCR                         | ↔                                                 | [224]     |
| 10              | Poly(I:C)            | Cortex, striatum and hippocampus          | Adult                        | In situ hybridisation (mRNA) | ↓ - when combined with PD19 data (*see below)     | [222]     |
| 12              | Poly(I:C)            | mPFC and amygdala                         | PD84+                        | RNAseq                       | ↓ amygdala of offspring with behavioural deficits | [34]      |
| 12.5            | Poly(I:C)            | S1                                        | PD70+                        | IHC                          | ↓ in layers 2+3 only                              | [221]     |
| 12-17           | Poly(I:C)            | mPFC, Hippocampus, NAc                    | PD78                         | IHC                          | ↓ PrL and CA1 regions only                        | [188]     |
| 12-17           | Poly(I:C)            | mPFC                                      | PD36<br>PD79                 | IHC                          | ↓<br>↓ PrL                                        | [220]     |
| 13-15           | Poly(I:C)            | Hippocampus                               | PD190                        | IHC                          | ↔ cell number, ↓ intensity                        | [225]     |
| 13-15           | Poly(I:C)            | DH                                        | PD168                        | qPCR<br>mRNA                 | ↓<br>↔                                            | [224]     |
| 13.5            | LPS                  | Barrel cortex                             | PD20<br>PD60                 | IHC                          | ↑<br>↔                                            | [226]     |
| 15              | Poly(I:C)            | PrL, amygdala, frontal association cortex | PD21, 35 and 90              | IHC                          | ↔                                                 | [235]     |
| 15              | Poly(I:C)            | DH                                        | PD84                         | IHC                          | ↔                                                 | [236]     |
| 15              | Poly(I:C)            | DG                                        | PD112                        | IHC                          | ↓                                                 | [232]     |
| 15              | Poly(I:C)            | Hippocampus                               | PD72 and 100                 | IHC                          | ↓                                                 | [231]     |
| 15-16           | LPS                  | mPFC, hippocampus, EC                     | PD90+                        | IHC                          | ↓mPFC, CA1, lateral EC (males)<br>↓mPFC (females) | [233]     |
| 17              | Poly(I:C)            | Hippocampus                               | PD133                        | qPCR<br>WB                   | ↔<br>↓DH, ↔ VH                                    | [234]     |
| 19              | Poly(I:C)            | Cortex, striatum and hippocampus          | Adult                        | mRNA                         | ↓ - when combined with PD10 data (*see above)     | [222]     |

**Abbreviations:** CA1, CA1 area of the hippocampus; DG, dentate gyrus; DH, dorsal hippocampus; EC, entorhinal cortex; IHC, immunohistochemistry; LPS, lipopolysaccharide; mRNA, messenger ribonucleic acid; PD, postnatal day; PrL, prelimbic cortex; qPCR, quantitative polymerase chain reaction; mPFC, medial prefrontal cortex; NAc, nucleus accumbens; RNAseq, next-generation RNA sequencing; S1, sensory cortex; VH, ventral hippocampus; WB, Western blot; ↑, ↓, ↔, indicates increase, decrease or no significant change, respectively . . .

stressor exposure [253]. Hence, the epigenome is both dynamic and labile in nature, and plausibly mediates interactions between the genome and the environment [254], aligning with the concept that epigenetic mechanisms act as mediator between environmental stimuli and bestowed behavioral phenotypes during periods of developmental plasticity [255], although such epigenetic regulation is likely to be highly complex and governed by the severity and duration of exposure and the vulnerability window of developing physiologic systems as well as offspring sex [256].

Within the framework of NDDs, epigenetic programming is gaining focus, with various epigenetic abnormalities identified in the brains of affected individuals [253,257]. Further, prenatal immune activation has been shown to alter the adult neural epigenome in mIA rodent models [44,254]. However, although the mechanisms that promote these epigenetic alterations remain to be fully defined, cytokine signalling pathways are hypothesised to be a key mediator [44,254]. Cytokines can activate enzymes involved in epigenetic mechanisms including DNA methyltransferases (DNMTs) and histone modifiers [159,163,258–261]. As such, altered fetal brain cytokine profiles, as a result of prenatal stress or infection, could lead to cell-specific epigenetic changes which, in turn, may alter the developmental trajectory of individual cell types. Epigenetic regulation therefore provides a likely intermediary mechanism by which inflammatory signalling during brain development can promote long-term developmental consequences and pre-dispose individuals to later life neuropathology. Indeed, during neurogenesis and gliogenesis, the IL-6 family of cytokines can epigenetically inhibit cell lineage markers to regulate the temporal formation of neurons, astrocytes and oligodendrocytes [167].

## DNA methylation

Epigenetic regulation involving DNA methylation is essential for normal neurodevelopment [262]. DNA methylation involves the transfer of a methyl group to the cytosine base of DNA by DNMT enzymes. The transcriptional effect depends on the site of methylation, DNA methylation in CpG sites in promoter regions represses gene expression, whereas DNA methylation within the gene body promotes transcription [263]. DNA methylation of regulatory regions of DNA modifies gene expression by keeping DNA in a repressive chromatin state, changing how the regulatory sequence is read by transcription factors, thereby silencing transcription and downregulating gene expression [264]. Altered DNA methylation can lead to enduring effects on gene expression determining phenotypes, while other epigenetic changes, such as histone acetylation, tend to be more transient in nature [262,265]. It also important to note that methylation signatures mark cellular identity within the diverse array of neuronal subtypes within the brain [266].

Studies into the neuro-epigenetic effects of mIA on offspring brain expression demonstrate a role for altered offspring methylation patterns in the development of NDDs, with multiple genes affected, in a development- and brain region-dependent manner, with both hypermethylation and hypomethylation changes observed [44]. The scope of this topic and the individual gene methylation changes seen is too broad to be considered here, but we have recently conducted a systematic review in which we report quantitative changes in gene/protein expression and epigenetic markers, to determine how neurodevelopmental gene expression and epigenetic modulation is altered in the developing brain across different developmental windows from rodent mIA models [44]. The conclusion from our analysis was, importantly, that a set of candidate genes showed reproducible gene expression changes relating to elevated neuroinflammatory markers, reduced myelination and reduced GABAergic signalling [44]. Of note, the majority of genes within the immune/stress response group were cytokines and chemokines. In addition, examination of DNA methylation (and histone modifications) from candidate gene studies showed that epigenetic changes frequently appeared to correlate to corresponding changes in the expression of the targeted genes, suggesting transcriptional ability of specific genes was directly affected by the associated epigenetic changes [44].

## Histone modifications

Histone proteins are subjected to an array of post-translational modifications, including, but not limited to, acetylation, methylation and phosphorylation [267]. Acetylation and methylation modify chromatin via the addition of acetyl or methyl groups, respectively, to lysine (K) or arginine (R) residues on the N-terminal tail of histone proteins [268]. Acetylation neutralizes the positive charge on these amino acid residues which weakens the interconnection between DNA, histones and adjacent histones and thus opens the chromatin structure to allow the transcription machinery to access DNA and activate gene transcription [269,270]. Histone methylation on the other hand, operates by providing binding docks for transcription factors, dependent on amino acid position as well as the state of methylation, which may repress or activate transcription [271]. Consequently, the histone code hypothesis posits that histone modifications have specific biological outcomes depending on the precise combination of histone modifying marks, which can be deciphered by their writers, erasers and readers [272–274]. This complex code of histone modifications not only allows the epigenome to control cellular differentiation and other vital neurodevelopmental processes, but also provides an intermediary mechanism by which adverse environmental conditions can increase the risk of developing a multitude of diseases [272,275].

Hyperacetylation of histone 3 (H3), on a global level, has been reported within the hippocampus of adult mIA offspring, contrasting with reduced global H4 acetylation [276]. While in the juvenile cortex of offspring exposed to poly(I:C) *in utero*, there is hypoacetylation of H3 as determined by reduced H3K9K14ac, and H4 also exhibits hypoacetylation, as shown by reduced H4K8ac, but these changes were not seen in adulthood, nor were they reported in hippocampus, at either juvenile or adult stages [277]. However, H3 and H4 showed significantly increased acetylation at the serotonin transporter gene (*Sert; Slc6a4*) promoter in the hippocampus of mIA mice, which was associated with increased SERT protein expression [276]. Others report that genes implicated in the pathology of SZ, including the glutamate receptor signalling pathway (e.g. *Gria1*), showed decreased promoter-specific histone acetylation (H3K9K14ac) in the juvenile cortex, while in the juvenile hippocampus, there was a relative increase in the hyperacetylation of this histone mark at the same gene loci, with no change in acetylation level of H4K8 at these promoter loci [277]. It is possible that altered acetylation might reflect an altered activity of histone deacetylase, which removes acetyl marks from histones, and whose expression and activity have been reported to be altered in the brain of mIA offspring [276,278]. Acetylation at gene promoters is often highly predictive of gene transcription [279,280] and hence, transcriptomic changes following aberrant acetylation in mIA offspring brains can be correspondingly mapped. Indeed, previous studies selecting genes previously implicated in the pathology of SZ from genetic and/or

microarray studies, and postulated to play a role in neurodevelopment, report altered gene expression in the juvenile cortex; hypoacetylation within the promoters was associated with reduced expression of genes such as *Robo1*, *Arhgap18*, *Ntrk3* and *Gria1*, whereas expression of *Disc1*, *Gria1*, *Gria2* and *Ntrk3*, all of which showed hyperacetylation within promoter loci, were elevated within the hippocampus of juvenile mIA offspring [44,277].

In contrast with the changes seen for histone acetylation, the current literature reports no difference in tri-methylation of Lys4 on histone 3 (H3K4me3), which plays critical roles in neurodevelopment [275,281]. However, this does not exclude the involvement of histone methylation in causing brain and behavioural deficits as a result of mIA, as studies using the adult cortex, comprising an extremely heterogeneous region, may mask the effect of mIA on histone methylation [220,235]. Also, epigenomic changes may precede distinct changes to the brain phenotype and subsequent behavioural deficits, as supported by aforementioned evidence of global hypoacetylation in the cortex of juvenile (PD24) but not adult (3 month) offspring [277]. Considering that histone modifications are more dynamic than DNA methylation [282], it is surprising that studies have not focused intensively on the fetal brain as a site for altered histone modifiers in the mIA model [163]. This presents an exciting area of investigation for future studies, especially as aberrant histone modifications in human fetal brain are associated with neural disease [283] and histone post-translational modifications are proposed to have lasting effects on the adult brain and behaviour through a prenatal programming axis, that influences susceptibility to NDD risk [284].

Together, the collective observations argue for a complex, integrative network of epigenomic changes that occur in response to mIA, both within the prenatal and postnatal brain, in a brain-region specific manner, and at specific gene loci, with differential patterns of transcriptional regulation. Disturbed epigenetic modulation of genes of relevance for neurodevelopment and function aligns with the concept that mIA-driven epigenetic modulation links to impaired neurodevelopmental patterning and function which programs behavioural phenotypes seen in NDDs, such as deficits in cognitive functions and anxiety-like behaviour [44].

## Non-coding RNAs

Non-coding RNAs (ncRNAs) can be divided into two groups: long ncRNA [285] and short ncRNA [286]. Small ncRNAs can also be subdivided into further groups including short interfering RNA (siRNA), P-element induced wimpy testis-interacting RNAs (piRNA), microRNA (miRNA) and transfer RNA (tRNA)-derived fragments (tRFs) [286,287]. Within these groups, miRNAs are perhaps the most well categorised and most widely expressed in mammalian tissues, comprising nucleotide structures of ~22bp. They function by binding to complementary mRNA transcripts, regulating gene expression by transcript and translation interference, usually by promoting transcript cleavage/degradation [286,288]. Studies evaluating miRNA function in human tissues have estimated that >30% of the total human transcriptome is regulated by miRNAs [289–291]. ncRNAs has important roles in normal brain development and function. The brain shows distinctly high levels of ncRNA expression compared to any other tissue [292]. Indeed, profiling of mice brain miRNA expression across development has suggested that 20% of miRNAs undergo significant changes of expression (both down and up regulation) over the developmental time-course [293]. Moreover, specific roles for ncRNA in brain development and function are emerging. Deletion of the long ncRNA, *Eyf2*, in mice reduces hippocampal GABAergic interneuron density and restricts forebrain development [294], while loss of function of specific miRNAs, including miR-219 [295], miR-9 [296,297] and miR-124 [298,299] have been shown to inhibit neurogenesis and gliogenesis.

Taken together, these studies suggest an important role for ncRNA in brain development, that may be dysregulated in NDDs. That said, ncRNA is perhaps the least studied epigenetic mechanism evaluated in mIA models. Global miRNA expression analysis in the cortex of prenatal poly(I:C)-exposed offspring found major differences in miRNA expression, with significant differential expression of miRNAs known to have a role in brain development and function, clustered within the *Dlk1-Dio3* imprinted domain [300]. Furthermore, more recent profiling of miRNAs in poly(I:C)-exposed mice offspring has shown significant changes in the hippocampus, including miR-877, miR-466 and miR-16 [301,302]. Moreover, recent evidence suggests that tRFs, a type of small ncRNAs that are cleaved from tRNAs, are also disrupted in response to mIA [287,303]. Notably, Su et al. [303] showed that both microRNAs and tRFs, including tRNA halves, were transiently altered in the maternal-fetal interface (placenta/decidua), with the most significant changes found 3 h post poly(I:C) injection. Taken together, these data suggest that changes to short ncRNAs may represent an understudied underlying mechanism responsible for mIA-altered gene expression in the developing brain with emerging data suggesting that effects on placental ncRNAs may also contribute to the fetal response to mIA.



# The COVID-19 pandemic and early childhood neurodevelopment: impact of maternal infection

## COVID-19 and pregnancy

Pregnant women are a high risk group for severe acute respiratory syndrome coronavirus 2 (SARS-CoV-2) infection as the physiological changes in the immune system during pregnancy could affect the progression of the disease [304]. The clinical manifestations noted in those testing positive for SARS-CoV-2 in hospital indicated that most women during pregnancy had a mild or moderate illness or were asymptomatic, though a small proportion had a more severe illness in the late second or third trimester of pregnancy [305,306]. Adverse pregnancy outcomes such as preeclampsia, small-for-gestational age and fetal distress were diagnosed in more women with SARS-CoV-2 infection, than in those without, and preterm delivery appeared to reflect the severity of their illness and carried a potential risk for neonatal morbidity and admission to a specialist neonatal intensive care unit [307,308]. As already outlined, some viral infections acquired during pregnancy can have damaging effects on the developing fetal brain, also postulated for SARS-CoV-2 infection [309,310]. Emerging evidence of an increase in neurodevelopmental impairments in the first few months of age among infants born during the coronavirus disease 2019 (COVID-19) pandemic, caused by the SARS-CoV-2 virus, has drawn attention to the prenatal exposure to this maternal infection [309]. In addition, the stress induced by exposure to the rapidly changing pandemic environment, including social distancing, financial strain, loss of childcare, school closures and food insecurity, has impacted on normal family life as well as mother-infant bonding, especially in under-resourced minorities [311]. It has been estimated that nearly 20 million babies per year could have been exposed globally to maternal COVID-19 infection *in utero* when infection was prevalent, with acknowledgement of the potential for neurodevelopmental morbidity in the offspring [309,310]. Indeed, a UK cohort study showed that in children hospitalised with neurological and psychiatric manifestations and testing positive for SARS-CoV-2, the central nervous system was particularly vulnerable with a high incidence of neuroimmune disorders reported related to this infection [312].

Vertical transmission of the virus from mother to fetus is uncommon but has been reported in a few cases [310,313], although its clinical significance in small numbers of infants previously based on case reports is not clear [305,314,315]. In a systematic review of the available literature, the vertical viral transmission rate was estimated as 0.63% and no structural congenital anomalies have emerged in newborns of SARS-CoV-2 positive mothers [316]. Hence, there is little evidence that SARS-CoV-2, can cross the human placenta [304,313,317], but the placentas of infected mothers do, however, display indicators of inflammation such as infiltration of maternal immune cells [313]. Moreover, the mIA response to SARS-CoV-2 infection, even in cases of mild disease, has been proposed to play a key role in affecting fetal development, including programming of the developing brain, through effects on the placental and immature blood-brain barriers rather than a direct effect of viral infection [318–321].

## Newborn infants: prenatal exposure to maternal SARS-CoV-2 infection

SARS-CoV-2 uses the angiotensin-converting enzyme 2 (ACE2) receptor as the primary receptor and neuropilin-1 (NRP1) as a co-receptor together with two proteases, transmembrane protease serine 2 (TMPRSS2) and cathepsin L (CTSL), and the pro-protein convertase FURIN, for cell entry to gain access to the host cell [313,322], leading to acute infection. It is intriguing that these entry receptors are highly expressed in the first and second trimester placentas, whereas at term, placental expression is lower [313], perhaps providing an access route for placental viral uptake, where placental viral load appears to correlate with clinical severity of maternal disease [313]. Interestingly, viral RNA and protein detected in human placenta was restricted to the epithelial layer of the syncytiotrophoblast that is in direct contact with maternal blood, and the underlying cytotrophoblast layer, with no evidence of progression beyond this into the villous core containing fetal capillaries [313].

The maternal immunological profile associated with SARS-CoV-2 infection in pregnancy and a potential impact of mIA on neurodevelopment in infants born during the pandemic has gained considerable interest [309,310,320]. SARS-CoV-2 infection in pregnancy was associated with an inflammatory response in the maternal circulation and at the maternal–fetal interface [321,323]. The possibility that the maternal immune response to an acute SARS-CoV-2 infection could cause damage to the fetal brain through inflammatory processes is supported by animal studies investigating links between mIA-driven risk for NDD conditions such as SZ and ASD [8,318,324,325], and as outlined above. This may impact genes that promote early brain development and function through dysregulated epigenetic mechanisms [44,142,310], as discussed in the previous section.

Maternal inflammatory cytokines and chemokines, including IL-6, CXCL10 and IL-8, were found to be increased among both early (first/second trimesters) and late (third trimester) pregnancy SARS-CoV-2 infections and were also present in cord blood [319]. A more extensive immune profiling, in largely asymptomatic women, also found IL-10,

IL-15 were significantly elevated in maternal blood [321]. Infants born to mothers testing positive for SARS-CoV-2 even had raised IL-8 concentrations in cord blood suggesting that this maternally generated cytokine is capable of crossing the placenta and entering the fetal circulation, while viral IgM antibody was undetectable in cord blood indicating that acute fetal infection did not occur [321]. The placentas of infants born to infected mothers had altered immune cell type ratios and altered immune activity as measured by immunophenotyping in the placenta and cord blood [321], and as already mentioned, there is a profound migration of maternal monocyte/macrophages and T cells into the maternal blood spaces [313]. Interestingly, SARS-CoV-2 infection was associated with the dysregulation of transcripts in maternal blood; those involved in humoral responses such as complement activation, adaptive immune responses, and immunoglobulin-mediated immune response were upregulated, whereas those enriched for phagocytosis and extracellular matrix organization were downregulated [321]. Similarly, SARS-CoV-2 infection caused transcriptional dysregulation in cord blood cells including immune cell response [321]. Of note, a strong placental inflammatory response was seen in infected samples with profound increases in the expression of proinflammatory cytokines, chemokines, and other inflammation-related genes when human placental cell clusters were treated *ex vivo* with SARS-CoV-2, including upregulated IL-6, TNF $\alpha$ , IL-8 and IL-19, with IL-6 and IL-10 signalling pathways appearing in the top canonical biological pathways affected [313]. The cytokine IL-6, in particular may have a potential impact on fetal health as it is a key intermediary in pathways whereby mIA alters fetal brain development in animal studies [86]. In pregnant women with SARS-CoV-2 infection, raised IL-6 concentrations have been correlated with the severity of infection [326] and IL-6 is one of several cytokines linked with preterm labour associated with maternal infection [327], and as already discussed, is probably capable of crossing the placenta [99,110]. Furthermore, IL-6 has also been associated with impaired neurodevelopment in children with cerebral palsy [328,329].

Collectively, these findings suggest that the placental transcriptome is affected by maternal SARS-CoV-2 infection with induction of inflammatory markers, also apparent in the fetal/neonatal immune system even if an acute fetal infection is unlikely to have occurred. Furthermore, the perturbations in immune cell populations and cytokines present in cord blood, in the absence of fetal infection, appear to enhance the potential for these cells to produce cytokines, not only in neonates born to mothers with recent or ongoing infection, but also in those from recovered mothers, suggesting *in utero* priming of the immune response is imprinted on the neonate [330]. Although the placenta appears to serve a protective role in preventing vertical transmission of SARS-CoV-2, the possibility exists that infection of the placenta, and downstream induced placental and fetal inflammatory responses, including placental-related vascular injuries, fetal growth restriction and fetal brain lesions, as detected by prenatal MRI scans [331], could have lasting developmental effects on infants, highlighting the need for the future assessment of children for developmental defects.

## Prenatal exposure to maternal SARS-CoV-2 infection and early childhood development

In infants born during the pandemic, emerging evidence of neurodevelopmental delay has raised concerns about whether prenatal exposure to maternal SARS-CoV-2 infection, the immune response to it, or the mother's psychological condition contribute to this delay [332,333]. However, the stresses related to exposure to the pandemic on family life including disruption of schooling and their impact on early childhood development are also recognised [311,334]. In the USA, a retrospective cohort study investigated the effects of prenatal exposure to maternal SARS-CoV-2 infection on infant development [335]. Preterm births occurred in a higher proportion of mothers with the infection. By age of 1 year, 6.3% of 222 infants exposed prenatally to maternal SARS-CoV-2 had a neurodevelopmental impairment compared with 3.5% of 7550 unexposed infants, with an increased frequency of specific developmental disorder of motor function, expressive language disorder, unspecified developmental disorder of speech and language, or other disorders of psychological development in the infection-exposed group. After statistical adjustment for race, ethnicity, insurance status, offspring sex, maternal age and preterm birth, a higher rate of neurodevelopmental impairment persisted among infants of mothers who had infection during pregnancy. The observed neurodevelopmental impairment rate associated with prenatal exposure to SARS-CoV-2 infection appeared to be enhanced by preterm birth, though this could not be entirely explained by prematurity.

A recent study in the USA [336] compared infant development in those exposed and unexposed prenatally to maternal SARS-CoV-2 infection, and in infants born at the same hospital before the pandemic (a historical cohort) that attended a Well Baby Clinic. Infant development was assessed using the Ages & Stages Questionnaire 3<sup>rd</sup> edition (ASQ-3) in 114 infants exposed to maternal SARS-CoV-2 infection and in 141 unexposed infants born during the pandemic. This study found no significant differences in any of the five subdomain scores of ASQ-3, including communication, gross motor, fine motor, problem solving, or personal social skills at age 6 months. Statistical adjustment

for gestational age at birth, infant sex, age at assessment, and maternal race, ethnicity, age at delivery, educational level, parity, mode of delivery and neonatal intensive care resulted in no significant differences between the study groups. After excluding infants born preterm or admitted to a neonatal unit, the ASQ-3 scores in a subset of 227 infants born during the pandemic, regardless of maternal SARS-CoV-2 status, were significantly lower in gross motor, fine motor and personal-social domains when compared with those in 62 infants in the historical cohort. These findings raised the possibility that pandemic-related stresses were implicated in an underlying mechanism that impacted early childhood development. The potential effects of job losses, food insecurity and loss of housing were suggested as they could have affected normal family life and infants growing up in this environment had shown differences in developmental outcome [336].

The results of the two studies indicate a wealth of factors can underscore how the COVID-19 pandemic may affect child development. Whether these outcomes reflect causal associations of prenatal exposure of the fetal brain to maternal infection and the impact of immune activation or mechanisms, or consequences related to societal changes and stresses to family life having an impact on early development [337], remains to be fully defined. There may have been differences in the timing of maternal infection during pregnancy and in the severity of illness. Notwithstanding these issues, others have found an increased risk of developmental delay in infants of mothers who had SARS-CoV-2 infection in the first or second trimester of pregnancy than in those whose mothers had infection in the third trimester [338], perhaps related to the expression of proteins that permit SARS-CoV-2 placental entry [313], as discussed above. Also, infants exposed prenatally to maternal SARS-CoV-2 had a lower motor optimality score [339] and infants screened during the pandemic scored lower in communication as compared to those screened before the pandemic, and those exposed prenatally to maternal SARS-CoV-2 scored lower in fine motor skills [340].

In demonstrating that exposure to the pandemic or prenatal exposure to maternal SARS-CoV-2 may contribute to the cause of NDD in early childhood, these associations do not indicate whether the NDDs are transient or lasting changes in central nervous system function. The gestational timing of maternal SARS-CoV-2 infection, the severity of infection, or the identity of the different SARS-Cov-2 variants could potentially contribute to developmental outcome [341]. But collectively, they support the need for long term follow-up, generating hypotheses and raising questions for future studies related to causality. A better understanding of the underlying causes would help to determine how best to intervene to mitigate the effects of the pandemic, and in doing so, achieve long term benefits to support the health and wellbeing not only of children, but also their progression to adulthood when other environmental triggers may reveal underlying neuropathology.

## Concluding remarks

Pregnant women comprise a group that have an enhanced risk of developing severe illness in response to infection. Stimulated maternal immune responses to infection, with accompanying mIA and the generation of proinflammatory cytokines and chemokines, raises the possibility for detrimental impacts also on fetal development (Figure 1). In particular, neural development presents a protracted developmental window susceptible to environmental stressors, as it involves an intricate and highly complex orchestration of staged events, both spatially and temporally, over both the prenatal and postnatal phases of development. During normal brain development, cytokines act as critical signalling molecules, so a perturbed local cytokine environment and/or the existence of neuroinflammation, is likely to have an influence on neurodevelopmental events and underlying neurodevelopmental trajectory, with consequences for NDD risk and predisposition to aberrant neuropsychiatric characteristics.

In order to devise therapeutic strategies to mitigate against this, it is imperative to delineate fully the neurodevelopmental mechanisms that are impacted by mIA, and define susceptible molecular loci that are affected, to understand comprehensively how mIA-evoked responses lead to enduring neuropathology in the offspring. In this context, mIA models, mostly in mice and rats, have been developed to simulate infection during pregnancy using mimetics such as LPS and poly(I:C). These have been invaluable in determining the scope of mIA responses in the mother, whilst providing a platform for investigating concomitant or subsequent changes within the fetal compartment, both at the placental interface and within the developing fetus. They have also afforded the benefit of being able to examine the pathogenesis of NDDs along a longitudinal developmental timeline into adulthood.

These studies have yielded a bounty of mechanistic insights, but the collective evidence supports a scenario whereby the mIA-stimulated elevation in maternal systemic cytokine concentrations is accompanied by joint inflammatory responses in the placenta and fetal brain (Figure 1). Activation of maternal immune cells within the placenta leads to an upregulated synthesis of cytokines and chemokines, resulting in raised placental concentrations. This response acts as an autocrine/paracrine signal to initiate multiple signalling cascades that alter the placental transcriptome and function of fetal trophoblast cells within the placenta. This can plausibly affect multiple downstream functional

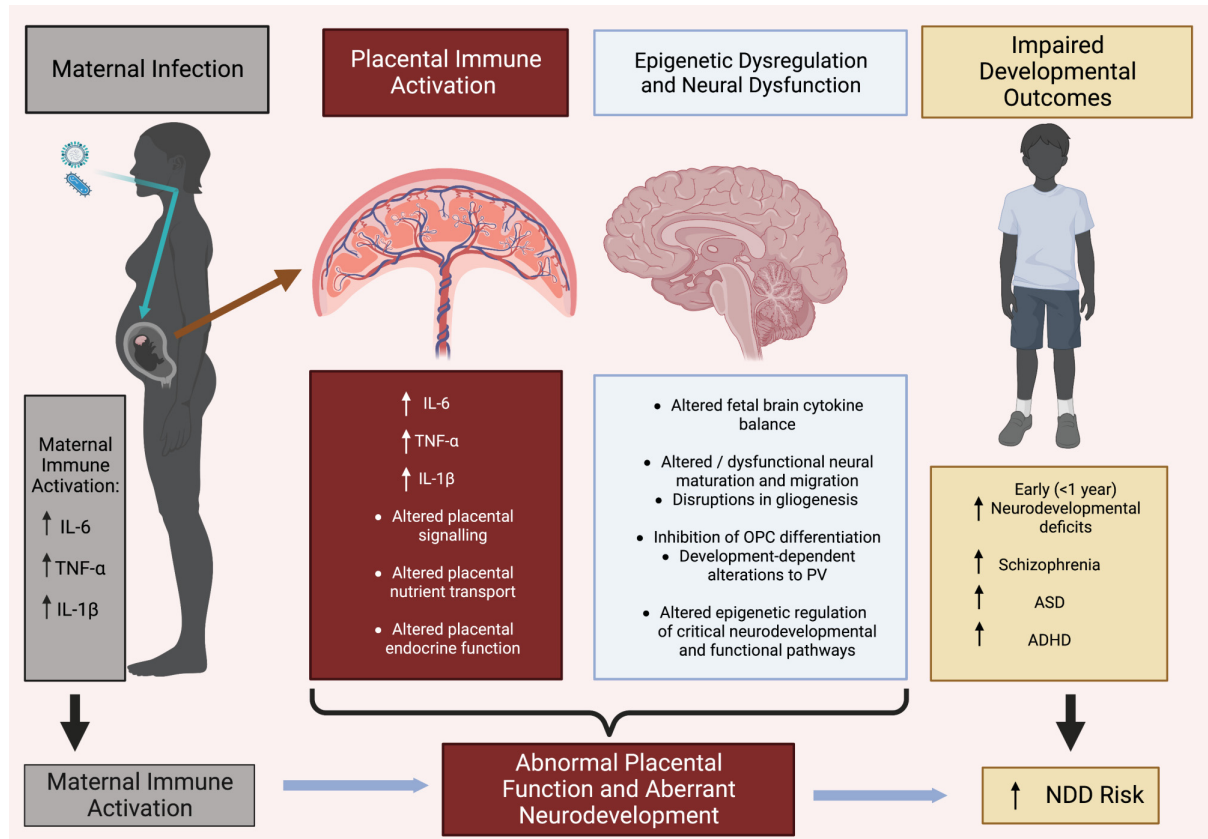

**Figure 1. Infection in pregnancy and implications for offspring neurodevelopment**

Maternal infection during pregnancy evokes maternal immune activation and increased systemic proinflammatory cytokine release. This results in the activation of maternal monocytes at the placental interface, resulting in placental immune activation and inflammation, associated with an increased placental concentration of proinflammatory cytokines. This leads to altered placental signalling and function and subsequent fetal brain neuroinflammation and disrupted cytokine balance, which affects epigenetic regulation of key neurodevelopmental pathways and impacts on neurodevelopmental signalling, causing microglial priming, disturbed neural progenitor cell proliferation, impaired neuronal migration and synaptogenesis, along with reduced myelin plasticity, which, together, can result in altered offspring neurodevelopment. Offspring affected by maternal immune activation have an increased risk of developing neurodevelopmental disorders (NDDs), including schizophrenia, autism spectrum disorder (ASD) and attention-deficit hyperactivity disorder (ADHD). *Created with BioRender.*

axes, including placental development, the capacity to provide nutrients or precursors that are crucial for normal fetal development, and/or its regulation, which collectively are likely to cause dysfunction of developmental processes and derangement of normal fetal physiological homeostasis (Figure 1). Within this setting, the activation of a variety of fetal signalling cascades, including immune response pathways, is likely to be invoked, consistent with the extensive changes found to the neural transcriptome and epigenome in the brains of mIA-exposed fetuses, at diverse molecular loci [44,163]. Obviously, the gestational timing of such perturbations and their duration will dictate the scope of neural developmental and functional impact, along with the plasticity of fetal adaptive responses to attenuate dysregulated function. Prenatal cytokine-driven perturbation in the developing brain alters neurogenesis, neuronal proliferation, migration, signalling and survival as well as glial and astrocyte activation (Figure 1). Such events are likely to be modulated by ‘placenta–fetal brain’ regulatory signalling cross-talk to prime such dysfunction. Hence, the concept that the ‘placenta is a window to the brain’ [140] is bolstered, and a more comprehensive elucidation of the mechanistic changes that mIA evokes to placental molecular function, and how these ‘program’ an aberrant neurodevelopmental trajectory that predisposes to an increased risk of NDDs in later life (Figure 1), will not only assist in therapeutic discovery, but may also be revelatory within the post-COVID-19 pandemic era.



Hence, the attainment of mechanistic insights and a better understanding of the mIA-related responses to SARS-CoV-2 affecting maternal health during pregnancy and the longer term impact for the mother and her child's development, allows the overlay of such knowledge to social medicine and public health, with the influences of stress, ethnicity, socio-economic position, and changing family life in the pandemic environment to be more completely understood. Further, how these collective influences impact on child development and relate to the disconcerting increase observed in NDDs highlights lessons to be learnt in meeting inevitable future pandemics.

## Data Availability

Data sharing is not applicable as this is a review article.

## Competing Interests

The authors declare that there are no competing interests associated with the manuscript.

## Funding

R.M.W and F.M. were supported by BBSRC PhD studentships. H.M.K. was supported by a University of Manchester President's Doctoral Scholarship.

## Open Access

Open access for this article was enabled by the participation of University of Manchester in an all-inclusive *Read & Publish* agreement with Portland Press and the Biochemical Society under a transformative agreement with JISC.

## CRediT Author Contribution

**Rebecca M. Woods:** Investigation, Writing—original draft, Writing—review & editing. **Jarred M. Lorusso:** Investigation, Writing—original draft, Writing—review & editing. **Jennifer Fletcher:** Investigation, Writing—original draft, Writing—review & editing. **Heidi ElTaher:** Investigation, Writing—original draft, Writing—review & editing. **Francesca McEwan:** Investigation, Writing—original draft, Writing—review & editing. **Isabella Harris:** Investigation, Writing—original draft, Writing—review & editing. **Hager M. Kowash:** Investigation, Writing—original draft, Writing—review & editing. **Stephen W. D'Souza:** Conceptualization, Investigation, Writing—original draft, Writing—review & editing. **Michael Harte:** Conceptualization, Supervision, Writing—original draft, Writing—review & editing. **Reinmar Hager:** Conceptualization, Supervision, Writing—original draft, Writing—review & editing. **Jocelyn D. Glazier:** Conceptualization, Supervision, Investigation, Writing—original draft, Writing—review & editing.

## Abbreviations

ACE, angiotensin-converting enzyme; ADHD, attention-deficit hyperactivity disorder; ASD, autism spectrum disorder; ASQ-3, Ages & Stages Questionnaire 3<sup>rd</sup> edition; BDNF, brain-derived neurotrophic factor; COVID-19, coronavirus disease 2019; E/I, excitatory/inhibitory; GABA,  $\gamma$ -aminobutyric acid; GAD, glutamic acid decarboxylase; GD, gestational day; H3, histone 3; H4, histone 4; JZ, junctional zone; LPS, lipopolysaccharide; LZ, labyrinth zone; MAPK, mitogen-activated protein kinase; mIA, maternal immune activation; miRNA, microRNA; ncRNAs, non-coding RNAs; NDD, neurodevelopmental disorder; NF $\kappa$ B, nuclear factor kappa light chain enhancer of activated B cells; NPC, neural progenitor cell; OPC, oligodendrocyte progenitor cell; PD, postnatal day; poly(I:C), polyinosinic:polycytidylic acid; PPI, prepulse inhibition; PVI, parvalbumin interneurons; SARS-CoV-2, severe acute respiratory syndrome coronavirus 2; STAT3, signal transducer and activator of transcription 3; SVZ, subventricular zone; SZ, schizophrenia; TLR, toll-like receptor; TPH, tryptophan hydroxylase; tRFs, transfer RNA (tRNA)-derived fragments; VZ, ventricular zone.

## References

- 1 Abu-Raya, B., Michalski, C., Sadarangani, M. and Lavoie, P.M. (2020) Maternal immunological adaptation during normal pregnancy. *Front. Immunol.* **11**, 575197, <https://doi.org/10.3389/fimmu.2020.575197>
- 2 PrabhuDas, M., Piper, J.M., Jean-Philippe, P. and Lachowicz-Scroggins, M. (2021) Immune regulation, maternal infection, vaccination, and pregnancy outcome. *J. Womens Health* **30**, 199–206, <https://doi.org/10.1089/jwh.2020.8854>
- 3 Bradbury, T.N. and Miller, G.A. (1985) Season of birth in schizophrenia: A review of evidence, methodology, and etiology. *Psychol. Bull.* **98**, 569–594, <https://doi.org/10.1037/0033-2909.98.3.569>
- 4 O'Callaghan, E., Sham, P., Takei, N., Glover, G. and Murray, R.M. (1991) Schizophrenia after prenatal exposure to 1957 A2 influenza epidemic. *Lancet* **337**, 1248–1250, [https://doi.org/10.1016/0140-6736\(91\)92919-S](https://doi.org/10.1016/0140-6736(91)92919-S)
- 5 McGrath, J.J., Pemberton, M.R., Welham, J.L. and Murray, R.M. (1994) Schizophrenia and the influenza epidemics of 1954, 1957 and 1959: a southern hemisphere study. *Schizophr. Res.* **14**, 1–8, [https://doi.org/10.1016/0920-9964\(94\)90002-7](https://doi.org/10.1016/0920-9964(94)90002-7)
- 6 Cannon, M., Cotter, D., Coffey, V.P., Sham, P.C., Takei, N., Larkin, C. et al. (1996) Prenatal exposure to the 1957 influenza epidemic and adult schizophrenia: a follow-up study. *Br. J. Psychiatry* **168**, 368–371, <https://doi.org/10.1192/bjp.168.3.368>

- 7 Meyer, U., Yee, B.K. and Feldon, J. (2007) The neurodevelopmental impact of prenatal infections at different times of pregnancy: The earlier the worse? *Neuroscientist* **13**, 241–256, <https://doi.org/10.1177/1073858406296401>
- 8 Estes, M.L. and McAllister, A.K. (2016) Maternal immune activation: Implications for neuropsychiatric disorders. *Science* **353**, 772–777, <https://doi.org/10.1126/science.aag3194>
- 9 Minakova, E. and Warner, B.B. (2018) Maternal immune activation, central nervous system development and behavioral phenotypes. *Birth Defects Res.* **110**, 1539–1550, <https://doi.org/10.1002/bdr2.1416>
- 10 Brown, A.S. and Derkits, E.J. (2010) Prenatal infection and schizophrenia: a review of epidemiologic and translational studies. *Am. J. Psychiatry* **167**, 261–280, <https://doi.org/10.1176/appi.ajp.2009.09030361>
- 11 Knuesel, I., Chicha, L., Britschgi, M., Schobel, S.A., Bodmer, M., Hellings, J.A. et al. (2014) Maternal immune activation and abnormal brain development across CNS disorders. *Nat. Rev. Neurol.* **10**, 643–660, <https://doi.org/10.1038/nrneurol.2014.187>
- 12 Brown, A.S. and Patterson, P.H. (2011) Maternal infection and schizophrenia: implications for prevention. *Schizophren. Bull.* **37**, 284–290, <https://doi.org/10.1093/schbul/sbq146>
- 13 Meyer, U. (2013) Developmental neuroinflammation and schizophrenia. *Prog. Neuropsychopharmacol. Biol. Psychiatry* **42**, 20–34, <https://doi.org/10.1016/j.pnpbp.2011.11.003>
- 14 Sappenfield, E., Jamieson, D.J. and Kourtis, A.P. (2013) Pregnancy and susceptibility to infectious diseases. *Infect. Dis. Obstet. Gynecol.* **2013**, 752852, <https://doi.org/10.1155/2013/752852>
- 15 Solek, C.M., Farooqi, N., Verly, M., Lim, T.K. and Ruthazer, E.S. (2018) Maternal immune activation in neurodevelopmental disorders. *Dev. Dyn.* **247**, 588–619, <https://doi.org/10.1002/dvdy.24612>
- 16 Boulanger-Bertolus, J., Pancaro, C. and Mashour, G.A. (2018) Increasing role of maternal immune activation in neurodevelopmental disorders. *Front. Behav. Neurosci.* **12**, 230, <https://doi.org/10.3389/fnbeh.2018.00230>
- 17 Zawadzka, A., Cieřlik, M. and Adamczyk, A. (2021) The role of maternal immune activation in the pathogenesis of autism: A review of the evidence, proposed mechanisms and implications for treatment. *Int. J. Mol. Sci.* **22**, 11516, <https://doi.org/10.3390/ijms222111516>
- 18 Patterson, P.H. (2009) Immune involvement in schizophrenia and autism: etiology, pathology and animal models. *Behav. Brain Res.* **204**, 313–321, <https://doi.org/10.1016/j.bbr.2008.12.016>
- 19 Bayer, T.A., Falkai, P. and Maier, W. (1999) Genetic and non-genetic vulnerability factors in schizophrenia: the basis of the “two hit hypothesis”. *J. Psychiatr. Res.* **33**, 543–548, [https://doi.org/10.1016/S0022-3956\(99\)00039-4](https://doi.org/10.1016/S0022-3956(99)00039-4)
- 20 Feigenson, K.A., Kusnecov, A.W. and Silverstein, S.M. (2014) Inflammation and the two-hit hypothesis of schizophrenia. *Neurosci. Biobehav. Rev.* **38**, 72–93, <https://doi.org/10.1016/j.neubiorev.2013.11.006>
- 21 Davis, J., Eyre, H., Jacka, F., Dodd, S., Dean, O., McEwen, S. et al. (2016) A review of vulnerability and risks for schizophrenia: Beyond the two hit hypothesis. *Neurosci. Biobehav. Rev.* **65**, 185–194, <https://doi.org/10.1016/j.neubiorev.2016.03.017>
- 22 Debnath, M., Venkatasubramanian, G. and Berk, M. (2015) Fetal programming of schizophrenia: select mechanisms. *Neurosci. Biobehav. Rev.* **49**, 90–104, <https://doi.org/10.1016/j.neubiorev.2014.12.003>
- 23 Brown, A.S. and Susser, E.S. (2002) In utero infection and adult schizophrenia. *Ment. Retard. Dev. Disabil. Res. Rev.* **8**, 51–57, <https://doi.org/10.1002/mrdd.10004>
- 24 Picci, G. and Scherf, K.S. (2015) A two-hit model of autism: Adolescence as the second hit. *Clin. Psychol. Sci.* **3**, 349–371, <https://doi.org/10.1177/2167702614540646>
- 25 Khandaker, G.M., Zimbron, J., Lewis, G. and Jones, P. (2013) Prenatal maternal infection, neurodevelopment and adult schizophrenia: A systematic review of population-based studies. *Psychol. Med.* **43**, 239–257, <https://doi.org/10.1017/S0033291712000736>
- 26 Atladóttir, H.Ó., Thorsen, P., Østergaard, L., Schendel, D.E., Lemcke, S., Abdallah, M. et al. (2010) Maternal infection requiring hospitalization during pregnancy and autism spectrum disorders. *J. Autism Dev. Disord.* **40**, 1423–1430, <https://doi.org/10.1007/s10803-010-1006-y>
- 27 Brown, A.S., Sourander, A., Hinkka-Yli-Salomäki, S., McKeague, I.W., Sundvall, J. and Surcel, H.-M. (2014) Elevated maternal C-reactive protein and autism in a national birth cohort. *Mol. Psychiatry* **19**, 259–264, <https://doi.org/10.1038/mp.2012.197>
- 28 Jiang, H.Y., Xu, L.L., Shao, L., Xia, R.M., Yu, Z.H., Ling, Z.X. et al. (2016) Maternal infection during pregnancy and risk of autism spectrum disorders: A systematic review and meta-analysis. *Brain Behav. Immun.* **58**, 165–172, <https://doi.org/10.1016/j.bbi.2016.06.005>
- 29 Walle, K.M., Askeland, R.B., Gustavson, K., Mjaaland, S., Ystrom, E., Lipkin, W.I. et al. (2022) Risk of attention-deficit hyperactivity disorder in offspring of mothers with infections during pregnancy. *JCPP Advances* **2**, e12070, <https://doi.org/10.1002/jcv2.12070>
- 30 Meyer, U. (2019) Neurodevelopmental resilience and susceptibility to maternal immune activation. *Trends Neurosci.* **42**, 793–806, <https://doi.org/10.1016/j.tins.2019.08.001>
- 31 Boksa, P. (2010) Effects of prenatal infection on brain development and behavior: a review of findings from animal models. *Brain Behav. Immun.* **24**, 881–897, <https://doi.org/10.1016/j.bbi.2010.03.005>
- 32 Murphy, S.K., Fineberg, A.M., Maxwell, S.D., Alloy, L.B., Zimmermann, L., Krigbaum, N.Y. et al. (2017) Maternal infection and stress during pregnancy and depressive symptoms in adolescent offspring. *Psychiatry Res.* **257**, 102–110, <https://doi.org/10.1016/j.psychres.2017.07.025>
- 33 Lorusso, J.M., Woods, R.M., McEwan, F., Glazier, J.D., Neill, J.C., Harte, M. et al. (2022) Clustering of cognitive phenotypes identifies susceptible and resilient offspring in a rat model of maternal immune activation and early-life stress. *Brain Behav. Immun. Health* **25**, 100514, <https://doi.org/10.1016/j.bbih.2022.100514>
- 34 Mueller, F.S., Scarborough, J., Schallbetter, S.M., Richetto, J., Kim, E., Couch, A. et al. (2021) Behavioral, neuroanatomical, and molecular correlates of resilience and susceptibility to maternal immune activation. *Mol. Psychiatry* **26**, 396–410, <https://doi.org/10.1038/s41380-020-00952-8>
- 35 Ashwood, P., Krakowiak, P., Hertz-Picciotto, I., Hansen, R., Pessah, I. and Van de Water, J. (2011) Elevated plasma cytokines in autism spectrum disorders provide evidence of immune dysfunction and are associated with impaired behavioral outcome. *Brain Behav. Immun.* **25**, 40–45, <https://doi.org/10.1016/j.bbi.2010.08.003>

- 36 Potvin, S., Stip, E., Sepehry, A.A., Gendron, A., Bah, R. and Kouassi, E. (2008) Inflammatory Cytokine alterations in schizophrenia: a systematic quantitative review. *Biol. Psychiatry* **63**, 801–808, <https://doi.org/10.1016/j.biopsych.2007.09.024>
- 37 Rodrigues-Amorim, D., Rivera-Baltanas, T., Spuch, C., Caruncho, H.J., Gonzalez-Fernandez, A., Olivares, J.M. et al. (2018) Cytokines dysregulation in schizophrenia: a systematic review of psychoneuroimmune relationship. *Schizophr. Res.* **197**, 19–33, <https://doi.org/10.1016/j.schres.2017.11.023>
- 38 Goldstein, J.A., Norris, S.A. and Aronoff, D.M. (2017) DOHaD at the intersection of maternal immune activation and maternal metabolic stress: a scoping review. *J. Dev. Orig. Health Dis.* **8**, 273–283, <https://doi.org/10.1017/S2040174417000010>
- 39 Kwon, H.K., Choi, G.B. and Huh, J.R. (2022) Maternal inflammation and its ramifications on fetal neurodevelopment. *Trends Immunol.* **43**, 230–244, <https://doi.org/10.1016/j.it.2022.01.007>
- 40 Gumusoglu, S.B. and Stevens, H.E. (2019) Maternal inflammation and neurodevelopmental programming: A review of preclinical outcomes and implications for translational psychiatry. *Biol. Psychiatry* **85**, 107–121, <https://doi.org/10.1016/j.biopsych.2018.08.008>
- 41 Macêdo, D.S., Araújo, D.P., Sampaio, L.R., Vasconcelos, S.M., Sales, P.M., Sousa, F.C. et al. (2012) Animal models of prenatal immune challenge and their contribution to the study of schizophrenia: a systematic review. *Braz. J. Med. Biol. Res.* **45**, 179–186, <https://doi.org/10.1590/S0100-879X2012007500031>
- 42 Meyer, U. and Feldon, J. (2010) Epidemiology-driven neurodevelopmental animal models of schizophrenia. *Prog. Neurobiol.* **90**, 285–326, <https://doi.org/10.1016/j.pneurobio.2009.10.018>
- 43 Kowash, H.M., Potter, H.G., Woods, R.M., Ashton, N., Hager, R., Neill, J.C. et al. (2022) Maternal immune activation in rats induces dysfunction of placental leucine transport and alters fetal brain growth. *Clin. Sci.* **136**, 1117–1137, <https://doi.org/10.1042/CS20220245>
- 44 Woods, R.M., Lorusso, J.M., Potter, H.G., Neill, J.C., Glazier, J.D. and Hager, R. (2021) Maternal immune activation in rodent models: A systematic review of neurodevelopmental changes in gene expression and epigenetic modulation in the offspring brain. *Neurosci. Biobehav. Rev.* **129**, 389–421, <https://doi.org/10.1016/j.neubiorev.2021.07.015>
- 45 Knipp, G.T., Audus, K.L. and Soares, M.J. (1999) Nutrient transport across the placenta. *Adv. Drug. Deliv. Rev.* **38**, 41–58, [https://doi.org/10.1016/S0169-409X\(99\)00005-8](https://doi.org/10.1016/S0169-409X(99)00005-8)
- 46 Serman, A. and Serman, L. (2011) Development of placenta in a rodent–model for human placentation. *Front Biosci (Elite Ed)* **3**, 233–239, <https://doi.org/10.2741/e238>
- 47 Soares, M.J., Chakraborty, D., Karim Rumi, M.A., Konno, T. and Renaud, S.J. (2012) Rat placentation: an experimental model for investigating the hemochorial maternal-fetal interface. *Placenta* **33**, 233–243, <https://doi.org/10.1016/j.placenta.2011.11.026>
- 48 Soares, M.J., Varberg, K.M. and Iqbal, K. (2018) Hemochorial placentation: development, function, and adaptations. *Biol. Reprod.* **99**, 196–211, <https://doi.org/10.1093/biolre/loy049>
- 49 Kusinski, L.C., Jones, C.J., Baker, P.N., Sibley, C.P. and Glazier, J.D. (2010) Isolation of plasma membrane vesicles from mouse placenta at term and measurement of system A and system beta amino acid transporter activity. *Placenta* **31**, 53–59, <https://doi.org/10.1016/j.placenta.2009.11.006>
- 50 Cramer, S., Beveridge, M., Kilberg, M. and Novak, D. (2002) Physiological importance of system A-mediated amino acid transport to rat fetal development. *Am. J. Physiol. Cell Physiol.* **282**, C153–C160, <https://doi.org/10.1152/ajpcell.2002.282.1.C153>
- 51 Novak, D.A. and Beveridge, M.J. (1997) Glutamine transport in human and rat placenta. *Placenta* **18**, 379–386, [https://doi.org/10.1016/S0143-4004\(97\)80037-9](https://doi.org/10.1016/S0143-4004(97)80037-9)
- 52 Glazier, J.D., Jones, C.J. and Sibley, C.P. (1990) Preparation of plasma membrane vesicles from the rat placenta at term and measurement of Na<sup>+</sup> uptake. *Placenta* **11**, 451–463, [https://doi.org/10.1016/S0143-4004\(05\)80218-8](https://doi.org/10.1016/S0143-4004(05)80218-8)
- 53 Glazier, J.D., Sibley, C.P. and Carter, A.M. (1996) Effect of fetal growth restriction on system A amino acid transporter activity in the maternal facing plasma membrane of rat syncytiotrophoblast. *Pediatr. Res.* **40**, 325–329, <https://doi.org/10.1203/00006450-199608000-00022>
- 54 Rennie, M.Y., Mu, J., Rahman, A., Qu, D., Whiteley, K.J. and Sled, J.G. (2014) The Uteroplacental, Fetoplacental, and Yolk Sac Circulations in the Mouse. In *The Guide to Investigation of Mouse Pregnancy* (Croy, B.A., Yamada, A.T., DeMayo, F.J., Adamson, S.L. et al., eds), pp. 201–210, Elsevier, London, UK, <https://doi.org/10.1016/B978-0-12-394445-0.00016-3>
- 55 Jollie, W.P. (1990) Development, morphology, and function of the yolk-sac placenta of laboratory rodents. *Teratology* **41**, 361–381, <https://doi.org/10.1002/tera.1420410403>
- 56 Jauniaux, E., Jurkovic, D., Henriot, Y., Rodesch, F. and Hustin, J. (1991) Development of the secondary human yolk sac: correlation of sonographic and anatomical features. *Hum. Reprod.* **6**, 1160–1166, <https://doi.org/10.1093/oxfordjournals.humrep.a137503>
- 57 Cindrova-Davies, T., Jauniaux, E., Elliot, M.G., Gong, S., Burton, G.J. and Charnock-Jones, D.S. (2017) RNA-seq reveals conservation of function among the yolk sacs of human, mouse, and chicken. *Proc. Natl. Acad. Sci. U. S. A.* **114**, E4753–E4761, <https://doi.org/10.1073/pnas.1702560114>
- 58 Ginhoux, F., Shaw, L., Hoeffel, G., Low, D. and Huber, T. (2013) Origin and differentiation of microglia. *Front. Cell. Neurosci.* **7**, 45, <https://doi.org/10.3389/fncel.2013.00045>
- 59 Bordeleau, M., Carrier, M., Luheshi, G.N. and Tremblay, M.É. (2019) Microglia along sex lines: From brain colonization, maturation and function, to implication in neurodevelopmental disorders. *Semin. Cell Dev. Biol.* **94**, 152–163, <https://doi.org/10.1016/j.semcdb.2019.06.001>
- 60 Bao, M., Hofsink, N. and Plösch, T. (2022) LPS versus Poly I:C model: comparison of long-term effects of bacterial and viral maternal immune activation on the offspring. *Am. J. Physiol. Regul. Integr. Comp. Physiol.* **322**, R99–R111, <https://doi.org/10.1152/ajpregu.00087.2021>
- 61 Mueller, F.S., Richetto, J., Hayes, L.N., Zamboni, A., Pollak, D.D., Sawa, A. et al. (2019) Influence of poly(I:C) variability on thermoregulation, immune responses and pregnancy outcomes in mouse models of maternal immune activation. *Brain Behav. Immun.* **80**, 406–418, <https://doi.org/10.1016/j.bbi.2019.04.019>
- 62 Hameete, B.C., Fernández-Calleja, J.M.S., de Groot, M.W.G.D.M., Oppewal, T.R., Tiemessen, M.M., Hogenkamp, A. et al. (2020) The poly(I:C)-induced maternal immune activation model; a systematic review and meta-analysis of cytokine levels in the offspring. *Brain Behav. Immun. Health* **11**, 100192, <https://doi.org/10.1016/j.bbih.2020.100192>

- 63 Fricke, E.M., Elgin, T.G., Gong, H., Reese, J., Gibson-Corley, K.N., Weiss, R.M. et al. (2018) Lipopolysaccharide-induced maternal inflammation induces direct placental injury without alteration in placental blood flow and induces a secondary fetal intestinal injury that persists into adulthood. *Am. J. Reprod. Immunol.* **79**, e12816, <https://doi.org/10.1111/aji.12816>
- 64 Gayle, D.A., Beloosesky, R., Desai, M., Amidi, F., Nuñez, S.E. and Ross, M.G. (2004) Maternal LPS induces cytokines in the amniotic fluid and corticotropin releasing hormone in the fetal rat brain. *Am. J. Physiol. Regul. Integr. Comp. Physiol.* **286**, R1024–R1029, <https://doi.org/10.1152/ajpregu.00664.2003>
- 65 Salminen, A., Paananen, R., Vuolteenaho, R., Metsola, J., Ojaniemi, M., Autio-Harmainen, H. et al. (2008) Maternal endotoxin-induced preterm birth in mice: fetal responses in toll-like receptors, collectins, and cytokines. *Pediatr. Res.* **63**, 280–286, <https://doi.org/10.1203/PDR.0b013e318163a8b2>
- 66 Ashdown, H., Dumont, Y., Ng, M., Poole, S., Boksa, P. and Luheshi, G.N. (2006) The role of cytokines in mediating effects of prenatal infection on the fetus: implications for schizophrenia. *Mol. Psychiatry* **11**, 47–55, <https://doi.org/10.1038/sj.mp.4001748>
- 67 Kowash, H.M., Potter, H.G., Edye, M.E., Prinssen, E.P., Bandinelli, S., Neill, J.C. et al. (2019) Poly(I:C) source, molecular weight and endotoxin contamination affect dam and prenatal outcomes, implications for models of maternal immune activation. *Brain Behav. Immun.* **82**, 160–166, <https://doi.org/10.1016/j.bbi.2019.08.006>
- 68 Kobayashi, Y., Inaba, H., Iwakura, Y., Namba, H., Sotoyama, H., Murata, Y. et al. (2021) Inter-breeder differences in prepulse inhibition deficits of C57Bl/6J mice in a maternal immune activation model. *Neuropsychopharmacol. Rep.* **41**, 416–421, <https://doi.org/10.1002/npr2.12178>
- 69 Kentner, A.C., Khoury, A., Lima Queiroz, E. and MacRae, M. (2016) Environmental enrichment rescues the effects of early life inflammation on markers of synaptic transmission and plasticity. *Brain Behav. Immun.* **57**, 151–160, <https://doi.org/10.1016/j.bbi.2016.03.013>
- 70 Zhao, X., Rondón-Ortiz, A.N., Lima, E.P., Puracchio, M., Roderick, R.C. and Kentner, A.C. (2020) Therapeutic efficacy of environmental enrichment on behavioral, endocrine, and synaptic alterations in an animal model of maternal immune activation. *Brain Behav. Immun. Health* **3**, 100043, <https://doi.org/10.1016/j.bbih.2020.100043>
- 71 Weber-Stadlbauer, U. and Meyer, U. (2019) Challenges and opportunities of a-priori and a-posteriori variability in maternal immune activation models. *Curr. Opin. Behav. Sci.* **28**, 119–128, <https://doi.org/10.1016/j.cobeha.2019.02.006>
- 72 Vivanti, G., Hamner, T. and Lee, N.R. (2018) Neurodevelopmental disorders affecting sociability: recent research advances and future directions in autism spectrum disorder and Williams syndrome. *Curr. Neurol. Neurosci. Rep.* **18**, 1–9, <https://doi.org/10.1007/s11910-018-0902-y>
- 73 Wilson, C.A. and Koenig, J.I. (2014) Social interaction and social withdrawal in rodents as readouts for investigating the negative symptoms of schizophrenia. *Eur. Neuropsychopharmacol.* **24**, 759–773, <https://doi.org/10.1016/j.euroneuro.2013.11.008>
- 74 Ziermans, T.B., Schothorst, P.F., Sprong, M., Magnée, M.J., van Engeland, H. and Kemner, C. (2012) Reduced prepulse inhibition as an early vulnerability marker of the psychosis prodrome in adolescence. *Schizophr. Res.* **134**, 10–15, <https://doi.org/10.1016/j.schres.2011.10.009>
- 75 Ashbrook, D.G., Cahill, S. and Hager, R. (2019) A Cross-Species Systems Genetics Analysis Links APBB1IP as a Candidate for Schizophrenia and Prepulse Inhibition. *Front. Behav. Neurosci.* **13**, 266, <https://doi.org/10.3389/fnbeh.2019.00266>
- 76 Young, J.W., Powell, S.B., Risbrough, V., Marston, H.M. and Geyer, M.A. (2009) Using the MATRICS to guide development of a preclinical cognitive test battery for research in schizophrenia. *Pharmacol. Ther.* **122**, 150–202, <https://doi.org/10.1016/j.pharmthera.2009.02.004>
- 77 Potter, H.G., Kowash, H.M., Woods, R.M., Revill, G., Grime, A., Deeney, B. et al. (2023) Maternal behaviours and adult offspring behavioural deficits are predicted by maternal TNF $\alpha$  concentration in a rat model of neurodevelopmental disorders. *Brain Behav. Immun.* **108**, 162–175, <https://doi.org/10.1016/j.bbi.2022.12.003>
- 78 Romine, C.B., Lee, D., Wolfe, M.E., Homack, S., George, C. and Riccio, C.A. (2004) Wisconsin Card Sorting Test with children: a meta-analytic study of sensitivity and specificity. *Arch. Clin. Neuropsychol.* **19**, 1027–1041, <https://doi.org/10.1016/j.acn.2003.12.009>
- 79 Grayson, B., Leger, M., Piercy, C., Adamson, L., Harte, M. and Neill, J.C. (2015) Assessment of disease-related cognitive impairments using the novel object recognition (NOR) task in rodents. *Behav. Brain Res.* **285**, 176–193, <https://doi.org/10.1016/j.bbr.2014.10.025>
- 80 Wolff, A.R., Cheyne, K.R. and Bilkey, D.K. (2011) Behavioural deficits associated with maternal immune activation in the rat model of schizophrenia. *Behav. Brain Res.* **225**, 382–387, <https://doi.org/10.1016/j.bbr.2011.07.033>
- 81 Xuan, I.C. and Hampson, D.R. (2014) Gender-dependent effects of maternal immune activation on the behavior of mouse offspring. *PLoS ONE* **9**, e104433, <https://doi.org/10.1371/journal.pone.0104433>
- 82 Malkova, N.V., Collin, Z.Y., Hsiao, E.Y., Moore, M.J. and Patterson, P.H. (2012) Maternal immune activation yields offspring displaying mouse versions of the three core symptoms of autism. *Brain Behav. Immun.* **26**, 607–616, <https://doi.org/10.1016/j.bbi.2012.01.011>
- 83 Zhao, X., Mohammed, R., Tran, H., Erickson, M. and Kentner, A.C. (2021) Poly (I:C)-induced maternal immune activation modifies ventral hippocampal regulation of stress reactivity: prevention by environmental enrichment. *Brain Behav. Immun.* **95**, 203–215, <https://doi.org/10.1016/j.bbi.2021.03.018>
- 84 Hrabovska, S. and Salyha, Y.T. (2016) Animal models of autism spectrum disorders and behavioral techniques of their examination. *Neurophysiology* **48**, 380–388, <https://doi.org/10.1007/s11062-017-9613-2>
- 85 Wolff, A.R. and Bilkey, D.K. (2010) The maternal immune activation (MIA) model of schizophrenia produces pre-pulse inhibition (PPI) deficits in both juvenile and adult rats but these effects are not associated with maternal weight loss. *Behav. Brain Res.* **213**, 323–327, <https://doi.org/10.1016/j.bbr.2010.05.008>
- 86 Smith, S.E., Li, J., Garbett, K., Mirnics, K. and Patterson, P.H. (2007) Maternal immune activation alters fetal brain development through interleukin-6. *J. Neurosci.* **27**, 10695–10702, <https://doi.org/10.1523/JNEUROSCI.2178-07.2007>
- 87 Gogos, A., Sbisà, A., Witkamp, D. and van den Buuse, M. (2020) Sex differences in the effect of maternal immune activation on cognitive and psychosis-like behaviour in Long Evans Rats. *Eur. J. Neurosci.* **52**, 2614–2626, <https://doi.org/10.1111/ejn.14671>
- 88 Jansson, T. and Powell, T.L. (2007) Role of the placenta in fetal programming: underlying mechanisms and potential interventional approaches. *Clin. Sci. (Lond.)* **113**, 1–13, <https://doi.org/10.1042/CS20060339>
- 89 Myatt, L. (2006) Placental adaptive responses and fetal programming. *J. Physiol.* **572**, 25–30, <https://doi.org/10.1111/jphysiol.2006.104968>



- 90 Sferuzzi-Perri, A.N. and Camm, E.J. (2016) The programming power of the placenta. *Front. Physiol.* **7**, 33, <https://doi.org/10.3389/fphys.2016.00033>
- 91 Bowen, J.M., Chamley, L., Mitchell, M.D. and Keelan, J.A. (2002) Cytokines of the placenta and extra-placental membranes: biosynthesis, secretion and roles in establishment of pregnancy in women. *Placenta* **23**, 239–256, <https://doi.org/10.1053/plac.2001.0781>
- 92 Saito, S. (2001) Cytokine cross-talk between mother and the embryo/placenta. *J. Reprod. Immunol.* **52**, 15–33, [https://doi.org/10.1016/S0165-0378\(01\)00112-7](https://doi.org/10.1016/S0165-0378(01)00112-7)
- 93 Meager, A. and Wadhwa, M. (2013) An overview of cytokine regulation of inflammation and immunity. *eLS*, John Wiley & Sons, Ltd, Chichester, <https://doi.org/10.1002/9780470015902.a0024658>
- 94 Deverman, B.E. and Patterson, P.H. (2009) Cytokines and CNS development. *Neuron* **64**, 61–78, <https://doi.org/10.1016/j.neuron.2009.09.002>
- 95 McAfoose, J. and Baune, B.T. (2009) Evidence for a cytokine model of cognitive function. *Neurosci. Biobehav. Rev.* **33**, 355–366, <https://doi.org/10.1016/j.neubiorev.2008.10.005>
- 96 McColl, E.R. and Piquette-Miller, M. (2019) Poly(I:C) alters placental and fetal brain amino acid transport in a rat model of maternal immune activation. *Am. J. Reprod. Immunol.* **81**, e13115, <https://doi.org/10.1111/aji.13115>
- 97 McColl, E.R., Hurtarte, M. and Piquette-Miller, M. (2022) Impact of inflammation and infection on the expression of amino acid transporters in the placenta: A minireview. *Drug Metab. Dispos.* **50**, 1251–1258, <https://doi.org/10.1124/dmd.121.000703>
- 98 Goeden, N., Velasquez, J., Arnold, K.A., Chan, Y., Lund, B.T., Anderson, G.M. et al. (2016) Maternal inflammation disrupts fetal neurodevelopment via increased placental output of serotonin to the fetal brain. *J. Neurosci.* **36**, 6041–6049, <https://doi.org/10.1523/JNEUROSCI.2534-15.2016>
- 99 Dahlgren, J., Samuelsson, A.-M., Jansson, T. and Holmång, A. (2006) Interleukin-6 in the maternal circulation reaches the rat fetus in mid-gestation. *Pediatr. Res.* **60**, 147–151, <https://doi.org/10.1203/01.pdr.0000230026.74139.18>
- 100 Atkinson, D.E., Robinson, N.R. and Sibley, C.P. (1991) Development of passive permeability characteristics of rat placenta during the last third of gestation. *Am. J. Physiol.* **261**, R1461–R1464, <https://doi.org/10.1152/ajpregu.1991.261.6.R1461>
- 101 Girard, S. and Sebire, G. (2016) Transplacental transfer of interleukin-1 receptor agonist and antagonist following maternal immune activation. *Am. J. Reprod. Immunol.* **75**, 8–12, <https://doi.org/10.1111/aji.12444>
- 102 Ponzio, N.M., Servatius, R., Beck, K., Marzouk, A. and Kreider, T. (2007) Cytokine levels during pregnancy influence immunological profiles and neurobehavioral patterns of the offspring. *Ann. N. Y. Acad. Sci.* **1107**, 118–128, <https://doi.org/10.1196/annals.1381.013>
- 103 Lewis, R.M., Baskaran, H., Green, J., Tashev, S., Palaiologou, E., Loffhouse, E.M. et al. (2022) 3D visualization of trans-syncytial nanopores provides a pathway for paracellular diffusion across the human placental syncytiotrophoblast. *iScience* **25**, 105453, <https://doi.org/10.1016/j.isci.2022.105453>
- 104 Banks, W.A., Kastin, A.J. and Gutierrez, E.G. (1994) Penetration of interleukin-6 across the murine blood-brain barrier. *Neurosci. Lett.* **179**, 53–56, [https://doi.org/10.1016/0304-3940\(94\)90933-4](https://doi.org/10.1016/0304-3940(94)90933-4)
- 105 de Vries, H.E., Blom-Roosemalen, M.C., van Oosten, M., de Boer, A.G., van Berkel, T.J., Breimer, D.D. et al. (1996) The influence of cytokines on the integrity of the blood-brain barrier in vitro. *J. Neuroimmunol.* **64**, 37–43, [https://doi.org/10.1016/0165-5728\(95\)00148-4](https://doi.org/10.1016/0165-5728(95)00148-4)
- 106 Varatharaj, A. and Galea, I. (2017) The blood-brain barrier in systemic inflammation. *Brain Behav. Immun.* **60**, 1–12, <https://doi.org/10.1016/j.bbi.2016.03.010>
- 107 Letterio, J.J., Geiser, A.G., Kulkarni, A.B., Roche, N.S., Sporn, M.B. and Roberts, A.B. (1994) Maternal rescue of transforming growth factor-beta 1 null mice. *Science* **264**, 1936–1938, <https://doi.org/10.1126/science.8009224>
- 108 Carbó, N., López-Soriano, F.J. and Argilés, J.M. (1998) Tumour necrosis factor-alpha does not cross the rat placenta. *Cancer Lett.* **128**, 101–104, [https://doi.org/10.1016/S0304-3835\(98\)00057-3](https://doi.org/10.1016/S0304-3835(98)00057-3)
- 109 Reisenberger, K., Egarter, C., Vogl, S., Sternberger, B., Kiss, H. and Husslein, P. (1996) The transfer of interleukin-8 across the human placenta perfused in vitro. *Obstet. Gynecol.* **87**, 613–616, [https://doi.org/10.1016/0029-7844\(95\)00473-4](https://doi.org/10.1016/0029-7844(95)00473-4)
- 110 Zaretsky, M.V., Alexander, J.M., Byrd, W. and Bawdon, R.E. (2004) Transfer of inflammatory cytokines across the placenta. *Obstet. Gynecol.* **103**, 546–550, <https://doi.org/10.1097/01.AOG.0000114980.40445.83>
- 111 Aaltonen, R., Heikkinen, T., Hakala, K., Laine, K. and Alanen, A. (2005) Transfer of proinflammatory cytokines across term placenta. *Obstet. Gynecol.* **106**, 802–807, <https://doi.org/10.1097/01.AOG.0000178750.84837.ed>
- 112 Aye, L., Jansson, T. and Powell, T.L. (2015) TNF- $\alpha$  stimulates System A amino acid transport in primary human trophoblast cells mediated by p38 MAPK signaling. *Physiol. Rep.* **3**, e12594, <https://doi.org/10.14814/phy2.12594>
- 113 Jones, H.N., Jansson, T. and Powell, T.L. (2009) IL-6 stimulates system A amino acid transporter activity in trophoblast cells through STAT3 and increased expression of SNAT2. *Am. J. Physiol. Cell Physiol.* **297**, C1228–C1235, <https://doi.org/10.1152/ajpcell.00195.2009>
- 114 Liong, S. and Lappas, M. (2017) Lipopolysaccharide and double stranded viral RNA mediate insulin resistance and increase system a amino acid transport in human trophoblast cells in vitro. *Placenta* **51**, 18–27, <https://doi.org/10.1016/j.placenta.2017.01.124>
- 115 Carbó, N., López-Soriano, F.J. and Argilés, J.M. (1995) Administration of tumor necrosis factor-alpha results in a decreased placental transfer of amino acids in the rat. *Endocrinology* **136**, 3579–3584, <https://doi.org/10.1210/endo.136.8.7628396>
- 116 Claycombe-Larson, K.G., Bundy, A.N. and Roemmich, J.N. (2020) Paternal high-fat diet and exercise regulate sperm miRNA and histone methylation to modify placental inflammation, nutrient transporter mRNA expression and fetal weight in a sex-dependent manner. *J. Nutr. Biochem.* **81**, 108373, <https://doi.org/10.1016/j.jnutbio.2020.108373>
- 117 Mirdamadi, K., Kwok, J., Nevo, O., Berger, H. and Piquette-Miller, M. (2021) Impact of Th-17 cytokines on the regulation of transporters in human placental explants. *Pharmaceutics* **13**, 881, <https://doi.org/10.3390/pharmaceutics13060881>
- 118 Cleal, J.K. and Lewis, R.M. (2008) The mechanisms and regulation of placental amino acid transport to the human foetus. *J. Neuroendocrinol.* **20**, 419–426, <https://doi.org/10.1111/j.1365-2826.2008.01662.x>
- 119 Bonnín, A., Goeden, N., Chen, K., Wilson, M.L., King, J., Shih, J.C. et al. (2011) A transient placental source of serotonin for the fetal forebrain. *Nature* **472**, 347–350, <https://doi.org/10.1038/nature09972>

- 120 Bonnin, A. and Levitt, P. (2011) Fetal, maternal, and placental sources of serotonin and new implications for developmental programming of the brain. *Neuroscience* **197**, 1–7, <https://doi.org/10.1016/j.neuroscience.2011.10.005>
- 121 Shi, L., Tu, N. and Patterson, P.H. (2005) Maternal influenza infection is likely to alter fetal brain development indirectly: the virus is not detected in the fetus. *Int. J. Dev. Neurosci.* **23**, 299–305, <https://doi.org/10.1016/j.ijdevneu.2004.05.005>
- 122 Fatemi, S.H., Folsom, T.D., Rooney, R.J., Mori, S., Kornfield, T.E., Reutiman, T.J. et al. (2012) The viral theory of schizophrenia revisited: abnormal placental gene expression and structural changes with lack of evidence for H1N1 viral presence in placenta of infected mice or brains of exposed offspring. *Neuropharmacology* **62**, 1290–1298, <https://doi.org/10.1016/j.neuropharm.2011.01.011>
- 123 Irving, W.L., James, D.K., Stephenson, T., Laing, P., Jameson, C., Oxford, J.S. et al. (2000) Influenza virus infection in the second and third trimesters of pregnancy: a clinical and seroepidemiological study. *BJOG* **107**, 1282–1289, <https://doi.org/10.1111/j.1471-0528.2000.tb11621.x>
- 124 Akira, S. and Takeda, K. (2004) Toll-like receptor signalling. *Nat. Rev. Immunol.* **4**, 499–511, <https://doi.org/10.1038/nri1391>
- 125 Koga, K. and Mor, G. (2008) Expression and function of toll-like receptors at the maternal-fetal interface. *Reprod. Sci.* **15**, 231–242, <https://doi.org/10.1177/1933719108316391>
- 126 Koga, K., Izumi, G., Mor, G., Fujii, T. and Osuga, Y. (2014) Toll-like receptors at the maternal-fetal interface in normal pregnancy and pregnancy complications. *Am. J. Reprod. Immunol.* **72**, 192–205, <https://doi.org/10.1111/aji.12258>
- 127 Barboza, R., Lima, F.A., Reis, A.S., Murillo, O.J., Peixoto, E.P.M., Bandeira, C.L. et al. (2017) TLR4-mediated placental pathology and pregnancy outcome in experimental malaria. *Sci. Rep.* **7**, 8623, <https://doi.org/10.1038/s41598-017-08299-x>
- 128 Xue, P., Zheng, M., Gong, P., Lin, C., Zhou, J., Li, Y. et al. (2015) Single administration of ultra-low-dose lipopolysaccharide in rat early pregnancy induces TLR4 activation in the placenta contributing to preeclampsia. *PLoS ONE* **10**, e0124001, <https://doi.org/10.1371/journal.pone.0124001>
- 129 Chatterjee, P., Weaver, L.E., Doersch, K.M., Kopriva, S.E., Chiasson, V.L., Allen, S.J. et al. (2012) Placental Toll-like receptor 3 and Toll-like receptor 7/8 activation contributes to preeclampsia in humans and mice. *PLoS ONE* **7**, e41884, <https://doi.org/10.1371/journal.pone.0041884>
- 130 Tinsley, J.H., Chiasson, V.L., Mahajan, A., Young, K.J. and Mitchell, B.M. (2009) Toll-like receptor 3 activation during pregnancy elicits preeclampsia-like symptoms in rats. *Am. J. Hypertens.* **22**, 1314–1319, <https://doi.org/10.1038/ajh.2009.185>
- 131 Tsukada, T., Shimada, H., Sakata-Haga, H., Shoji, H., Iizuka, H. and Hatta, T. (2021) Decidual cells are the initial target of polyriboinosinic-polyribocytidylic acid in a mouse model of maternal viral infection. *Biochem. Biophys. Rep.* **26**, 100958, <https://doi.org/10.1016/j.bbrep.2021.100958>
- 132 Hsiao, E.Y. and Patterson, P.H. (2012) Placental regulation of maternal-fetal interactions and brain development. *Dev. Neurobiol.* **72**, 1317–1326, <https://doi.org/10.1002/dneu.22045>
- 133 Koga, K., Cardenas, I., Aldo, P., Abrahams, V.M., Peng, B. et al. (2009) Activation of TLR3 in the trophoblast is associated with preterm delivery. *Am. J. Reprod. Immunol.* **61**, 196–212, <https://doi.org/10.1111/j.1600-0897.2008.00682.x>
- 134 Hsiao, E.Y. and Patterson, P.H. (2011) Activation of the maternal immune system induces endocrine changes in the placenta via IL-6. *Brain Behav. Immun.* **25**, 604–615, <https://doi.org/10.1016/j.bbi.2010.12.017>
- 135 Forbes, K. and Westwood, M. (2008) The IGF axis and placental function. *Horm. Res.* **69**, 129–137, <https://doi.org/10.1159/000112585>
- 136 Lager, S. and Powell, T.L. (2012) Regulation of nutrient transport across the placenta. *J. Pregnancy* **2012**, 179827, <https://doi.org/10.1155/2012/179827>
- 137 Fowden, A.L., Sferruzzi-Perri, A.N., Coan, P.M., Constancia, M. and Burton, G.J. (2009) Placental efficiency and adaptation: endocrine regulation. *J. Physiol.* **587**, 3459–3472, <https://doi.org/10.1113/jphysiol.2009.173013>
- 138 Wu, W.L., Hsiao, E.Y., Yan, Z., Mazmanian, S.K. and Patterson, P.H. (2017) The placental interleukin-6 signaling controls fetal brain development and behavior. *Brain Behav. Immun.* **62**, 11–23, <https://doi.org/10.1016/j.bbi.2016.11.007>
- 139 Han, V.X., Patel, S., Jones, H.F. and Dale, R.C. (2021) Maternal immune activation and neuroinflammation in human neurodevelopmental disorders. *Nat. Rev. Neurol.* **17**, 564–579, <https://doi.org/10.1038/s41582-021-00530-8>
- 140 Shallie, P.D. and Naicker, T. (2019) The placenta as a window to the brain: A review on the role of placental markers in prenatal programming of neurodevelopment. *Int. J. Dev. Neurosci.* **73**, 41–49, <https://doi.org/10.1016/j.ijdevneu.2019.01.003>
- 141 Kratimenos, P. and Penn, A.A. (2019) Placental programming of neuropsychiatric disease. *Pediatr. Res.* **86**, 157–164, <https://doi.org/10.1038/s41390-019-0405-9>
- 142 Durbagula, S., Korlimarla, A., Ravikumar, G., Valiya Parambath, S. et al. (2022) Prenatal epigenetic factors are predisposing for neurodevelopmental disorders-Considering placenta as a model. *Birth Defects Res.* **114**, 1324–1342, <https://doi.org/10.1002/bdr2.2119>
- 143 Zeitser, L.M. and Leibel, R.L. (2011) Roles of the placenta in fetal brain development. *Proc. Natl. Acad. Sci. U.S.A.* **108**, 15667–15668, <https://doi.org/10.1073/pnas.1112239108>
- 144 Ursini, G., Punzi, G., Chen, Q., Marengo, S., Robinson, J.F., Porcelli, A. et al. (2018) Convergence of placenta biology and genetic risk for schizophrenia. *Nat. Med.* **24**, 792–801, <https://doi.org/10.1038/s41591-018-0021-y>
- 145 Jiang, X. and Nardelli, J. (2016) Cellular and molecular introduction to brain development. *Neurobiol. Dis.* **92**, 3–17, <https://doi.org/10.1016/j.nbd.2015.07.007>
- 146 Stiles, J. and Jernigan, T.L. (2010) The basics of brain development. *Neuropsychol. Rev.* **20**, 327–348, <https://doi.org/10.1007/s11065-010-9148-4>
- 147 Tau, G.Z. and Peterson, B.S. (2010) Normal development of brain circuits. *Neuropsychopharmacology* **35**, 147–168, <https://doi.org/10.1038/npp.2009.115>
- 148 Giussani, D.A. (2011) The vulnerable developing brain. *Proc. Natl. Acad. Sci. U.S.A.* **108**, 2641–2642, <https://doi.org/10.1073/pnas.1019726108>
- 149 Mattei, D., Schweibold, R. and Wolf, S.A. (2015) Brain in flames - animal models of psychosis: utility and limitations. *Neuropsychiatr. Dis. Treat.* **11**, 1313–1329, <https://doi.org/10.2147/NDT.S65564>
- 150 Meyer, U., Feldon, J. and Yee, B.K. (2009) A review of the fetal brain cytokine imbalance hypothesis of schizophrenia. *Schizophr. Bull.* **35**, 959–972, <https://doi.org/10.1093/schbul/sbn022>

- 151 Rapoport, J.C., Addington, A.M. and Frangou, S. (2005) The neurodevelopmental model of schizophrenia: update 2005. *Mol. Psychiatry* **10**, 434–449, <https://doi.org/10.1038/sj.mp.4001642>
- 152 Weinberger, D.R. (1987) Implications of normal brain-development for the pathogenesis of schizophrenia. *Arch. Gen. Psychiatry* **44**, 660–669, <https://doi.org/10.1001/archpsyc.1987.01800190080012>
- 153 Stolp, H.B. (2013) Neurotrophic cytokines in normal brain development and neurodevelopmental disorders. *Mol. Cell. Neurosci.* **53**, 63–68, <https://doi.org/10.1016/j.mcn.2012.08.009>
- 154 Dziegielewska, K.M., Möller, J.E., Potter, A.M., Ek, J., Lane, M.A. and Saunders, N.R. (2000) Acute-phase cytokines IL-1beta and TNF-alpha in brain development. *Cell Tissue Res.* **299**, 335–345
- 155 Adachi, T., Takanaga, H., Kunimoto, M. and Asou, H. (2005) Influence of LIF and BMP-2 on differentiation and development of glial cells in primary cultures of embryonic rat cerebral hemisphere. *J. Neurosci. Res.* **79**, 608–615, <https://doi.org/10.1002/jnr.20373>
- 156 Borsini, A., Zunszain, P.A., Thuret, S. and Pariante, C.M. (2015) The role of inflammatory cytokines as key modulators of neurogenesis. *Trends Neurosci.* **38**, 145–157, <https://doi.org/10.1016/j.tins.2014.12.006>
- 157 Hatta, T., Moriyama, K., Nakashima, K., Taga, T. and Otani, H. (2002) The role of gp130 in cerebral cortical development: in vivo functional analysis in a mouse exo utero system. *J. Neurosci.* **22**, 5516–5524, <https://doi.org/10.1523/JNEUROSCI.22-13-05516.2002>
- 158 Comer, A.L., Carrier, M., Tremblay, M.É. and Cruz-Martín, A. (2020) The Inflamed Brain in Schizophrenia: The Convergence of Genetic and Environmental Risk Factors That Lead to Uncontrolled Neuroinflammation. *Front. Cell. Neurosci.* **14**, 274, <https://doi.org/10.3389/fncel.2020.00274>
- 159 Komada, M. and Nishimura, Y. (2022) Epigenetics and Neuroinflammation Associated With Neurodevelopmental Disorders: A Microglial Perspective. *Front. Cell Dev. Biol.* **10**, 852752, <https://doi.org/10.3389/fcell.2022.852752>
- 160 Gotz, M. and Huttner, W.B. (2005) The cell biology of neurogenesis. *Nat. Rev. Mol. Cell Biol.* **6**, 777–788, <https://doi.org/10.1038/nrm1739>
- 161 Flagstad, P., Mørk, A., Glenhøj, B.Y., van Beek, J., Michael-Titus, A.T. and Didriksen, M. (2004) Disruption of neurogenesis on gestational day 17 in the rat causes behavioral changes relevant to positive and negative schizophrenia symptoms and alters amphetamine-induced dopamine release in nucleus accumbens. *Neuropsychopharmacology* **29**, 2052–2064, <https://doi.org/10.1038/sj.npp.1300516>
- 162 Lossi, L., Castagna, C., Granato, A. and Merighi, A. (2019) The *Reeler* Mouse: A Translational Model of Human Neurological Conditions, or Simply a Good Tool for Better Understanding Neurodevelopment? *J. Clin. Med.* **8**, 2088, <https://doi.org/10.3390/jcm8122088>
- 163 McEwan, F., Glazier, J.D. and Hager, R. (2023) The impact of maternal immune activation on embryonic brain development. *Front. Neurosci.* **17**, 1146710, <https://doi.org/10.3389/fnins.2023.1146710>
- 164 Ma, L., Li, X., Zhang, S., Yang, F., Zhu, G., Yuan, X. et al. (2014) Interleukin-1 beta guides the migration of cortical neurons. *J. Neuroinflammation* **11**, 114, <https://doi.org/10.1186/1742-2094-11-114>
- 165 Stumm, R.K., Zhou, C., Ara, T., Lazarini, F., Dubois-Dalcq, M., Nagasawa, T. et al. (2003) CXCR4 regulates interneuron migration in the developing neocortex. *J. Neurosci.* **23**, 5123–5130, <https://doi.org/10.1523/JNEUROSCI.23-12-05123.2003>
- 166 Tiveron, M., Rossel, M., Moeppe, B., Zhang, Y.L., Seidenfaden, R., Favor, J. et al. (2006) Molecular interaction between projection neuron precursors and invading interneurons via stromal-derived factor 1(CXCL12)/CXCR4 signaling in the cortical subventricular zone/intermediate zone. *J. Neurosci.* **26**, 13273–13278, <https://doi.org/10.1523/JNEUROSCI.4162-06.2006>
- 167 Miller, F.D. and Gauthier, A.S. (2007) Timing is everything: making neurons versus glia in the developing cortex. *Neuron* **54**, 357–369, <https://doi.org/10.1016/j.neuron.2007.04.019>
- 168 Mousa, A. and Bakhiet, M. (2013) Role of cytokine signaling during nervous system development. *Int. J. Mol. Sci.* **14**, 13931–13957, <https://doi.org/10.3390/ijms140713931>
- 169 Mony, T.J., Lee, J.W., Dreyfus, C., DiCicco-Bloom, E. and Lee, H.J. (2016) Valproic Acid Exposure during Early Postnatal Gliogenesis Leads to Autistic-like Behaviors in Rats. *Clin. Psychopharmacol. Neurosci.* **14**, 338–344, <https://doi.org/10.9758/cpn.2016.14.4.338>
- 170 Sloan, S.A. and Barres, B.A. (2014) Mechanisms of astrocyte development and their contributions to neurodevelopmental disorders. *Curr. Opin. Neurobiol.* **27**, 75–81, <https://doi.org/10.1016/j.conb.2014.03.005>
- 171 van Tilborg, E., de Theije, C.G.M., van Hal, M., Wagenaar, N., de Vries, L.S., Benders, M.J. et al. (2017) Origin and dynamics of oligodendrocytes in the developing brain: implications for perinatal white matter injury. *Glia* **66**, 221–238, <https://doi.org/10.1002/glia.23256>
- 172 Favrais, G., van de Looij, Y., Fleiss, B., Ramanantsoa, N., Bonnin, P., Stoltenberg-Didinger, G. et al. (2011) Systemic inflammation disrupts the developmental program of white matter. *Annal. Neurol.* **70**, 550–565, <https://doi.org/10.1002/ana.22489>
- 173 Taylor, D.L., Pirianov, G., Holland, S., McGinnity, C.J., Norman, A.L., Reali, C. et al. (2010) Attenuation of proliferation in oligodendrocyte precursor cells by activated microglia. *J. Neurosci. Res.* **88**, 1632–1644, <https://doi.org/10.1002/jnr.22335>
- 174 Ronzano, R., Thetiot, M., Lubetzki, C. and Desmazieres, A. (2020) Myelin Plasticity and Repair: Neuro-Glial Choir Sets the Tuning. *Front. Cell. Neurosci.* **14**, 42, <https://doi.org/10.3389/fncel.2020.00042>
- 175 Peterson, L.K. and Fujinami, R.S. (2007) Inflammation, demyelination, neurodegeneration and neuroprotection in the pathogenesis of multiple sclerosis. *J. Neuroimmunol.* **184**, 37–44, <https://doi.org/10.1016/j.jneuroim.2006.11.015>
- 176 Ratnayake, U., Quinn, T., Walker, D.W. and Dickinson, H. (2013) Cytokines and the neurodevelopmental basis of mental illness. *Front. Neurosci.* **7**, 180, <https://doi.org/10.3389/fnins.2013.00180>
- 177 Soulet, D. and Rivest, S. (2008) Microglia. *Curr. Biol.* **18**, R506–R508, <https://doi.org/10.1016/j.cub.2008.04.047>
- 178 Menassa, D.A. and Gomez-Nicola, D. (2018) Microglial dynamics during human brain development. *Front. Immunol.* **9**, 1014, <https://doi.org/10.3389/fimmu.2018.01014>
- 179 Frank, M.G., Baratta, M.V., Sprunger, D.B., Watkins, L.R. and Maier, S.F. (2007) Microglia serve as a neuroimmune substrate for stress-induced potentiation of CNS pro-inflammatory cytokine responses. *Brain Behav. Immun.* **21**, 47–59, <https://doi.org/10.1016/j.bbi.2006.03.005>
- 180 Perry, V.H. (2007) Stress primes microglia to the presence of systemic inflammation: implications for environmental influences on the brain. *Brain Behav. Immun.* **21**, 45–46, <https://doi.org/10.1016/j.bbi.2006.08.004>



- 181 Guan, Z. and Fang, J. (2006) Peripheral immune activation by lipopolysaccharide decreases neurotrophins in the cortex and hippocampus in rats. *Brain Behav. Immun.* **20**, 64–71, <https://doi.org/10.1016/j.bbi.2005.04.005>
- 182 Gibney, S.M., McGuinness, B., Prendergast, C., Harkin, A. and Connor, T.J. (2013) Poly I:C-induced activation of the immune response is accompanied by depression and anxiety-like behaviours, kynurenine pathway activation and reduced BDNF expression. *Brain Behav. Immun.* **28**, 170–181, <https://doi.org/10.1016/j.bbi.2012.11.010>
- 183 Chao, M.V. (2003) Neurotrophins and their receptors: a convergence point for many signalling pathways. *Nat. Rev. Neurosci.* **4**, 299–309, <https://doi.org/10.1038/nrn1078>
- 184 Poo, M.M. (2001) Neurotrophins as synaptic modulators. *Nat. Rev. Neurosci.* **2**, 24–32, <https://doi.org/10.1038/35049004>
- 185 Di Carlo, P., Punzi, G. and Ursini, G. (2019) Brain-derived neurotrophic factor and schizophrenia. *Psychiatr. Genet.* **29**, 200–210, <https://doi.org/10.1097/YPG.0000000000000237>
- 186 Parkhurst, C.N., Yang, G., Nanan, I., Savas, J.N., Yates, 3rd, J.R., Lafaille, J.J. et al. (2013) Microglia promote learning-dependent synapse formation through brain-derived neurotrophic factor. *Cell* **155**, 1596–1609, <https://doi.org/10.1016/j.cell.2013.11.030>
- 187 Tanaka, S., Ide, M., Shibutani, T., Ohtaki, H., Numazawa, S., Shioda, S. et al. (2006) Lipopolysaccharide-induced microglial activation induces learning and memory deficits without neuronal cell death in rats. *J. Neurosci. Res.* **83**, 557–566, <https://doi.org/10.1002/jnr.20752>
- 188 Han, M., Zhang, J.C., Yao, W., Yang, C., Ishima, T., Ren, Q. et al. (2016) Intake of 7,8-Dihydroxyflavone During Juvenile and Adolescent Stages Prevents Onset of Psychosis in Adult Offspring After Maternal Immune Activation. *Sci. Rep.* **6**, 36087, <https://doi.org/10.1038/srep36087>
- 189 Schaafsma, W., Basterra, L.B., Jacobs, S., Brouwer, N., Meerlo, P., Schaafsma, A. et al. (2017) Maternal inflammation induces immune activation of fetal microglia and leads to disrupted microglia immune responses, behavior, and learning performance in adulthood. *Neurobiol. Dis.* **106**, 291–300, <https://doi.org/10.1016/j.nbd.2017.07.017>
- 190 Dutra, M.L., Dias, P., Freiburger, V., Ventura, L., Comim, C.M., Martins, D.F. et al. (2023) Maternal immune activation induces autism-like behavior and reduces brain-derived neurotrophic factor levels in the hippocampus and offspring cortex of C57BL/6 mice. *Neurosci. Lett.* **793**, 136974, <https://doi.org/10.1016/j.neulet.2022.136974>
- 191 Mosser, C.A., Baptista, S., Arnoux, I. and Audinat, E. (2017) Microglia in CNS development: shaping the brain for the future. *Prog. Neurobiol.* **149–150**, 1–20, <https://doi.org/10.1016/j.pneurobio.2017.01.002>
- 192 Perez-Catalan, N.A., Doe, C.Q. and Ackerman, S.D. (2021) The role of astrocyte-mediated plasticity in neural circuit development and function. *Neural. Devel.* **16**, 1, <https://doi.org/10.1186/s13064-020-00151-9>
- 193 Sofroniew, M.V. (2014) Astroglialosis. *Cold Spring Harb. Perspect. Biol.* **7**, a020420, <https://doi.org/10.1101/cshperspect.a020420>
- 194 Henstridge, C.M., Tzioras, M. and Paolicelli, R.C. (2019) Glial Contribution to Excitatory and Inhibitory Synapse Loss in Neurodegeneration. *Front. Cell. Neurosci.* **13**, 63, <https://doi.org/10.3389/fncel.2019.00063>
- 195 Bernstein, H.G., Steiner, J., Guest, P.C., Dobrowolny, H. and Bogerts, B. (2015) Glial cells as key players in schizophrenia pathology: recent insights and concepts of therapy. *Schizophr. Res.* **161**, 4–18, <https://doi.org/10.1016/j.schres.2014.03.035>
- 196 Frick, L.R., Williams, K. and Pittenger, C. (2013) Microglial dysregulation in psychiatric disease. *Clin. Dev. Immunol.* **2013**, e608654, <https://doi.org/10.1155/2013/608654>
- 197 Allen, M., Huang, B.S., Notaras, M.J., Lodhi, A., Barrio-Alonso, E., Lituma, P.J. et al. (2022) Astrocytes derived from ASD individuals alter behavior and destabilize neuronal activity through aberrant Ca<sup>2+</sup> signaling. *Mol. Psychiatry* **27**, 2470–2484, <https://doi.org/10.1038/s41380-022-01486-x>
- 198 de Oliveira Figueiredo, E.C., Cali, C., Petrelli, F. and Bezzi, P. (2022) Emerging evidence for astrocyte dysfunction in schizophrenia. *Glia* **70**, 1585–1604, <https://doi.org/10.1002/glia.24221>
- 199 de Souza, D.F., Wartchow, K.M., Lunardi, P.S., Brolese, G., Tortorelli, L.S., Batassini, C. et al. (2015) Changes in Astroglial Markers in a Maternal Immune Activation Model of Schizophrenia in Wistar Rats are Dependent on Sex. *Front. Cell. Neurosci.* **9**, 489, <https://doi.org/10.3389/fncel.2015.00489>
- 200 Hui, C.W., Vecchiarelli, H.A., Gervais, É., Luo, X., Michaud, F., Scheefhals, L. et al. (2020) Sex Differences of Microglia and Synapses in the Hippocampal Dentate Gyrus of Adult Mouse Offspring Exposed to Maternal Immune Activation. *Front. Cell. Neurosci.* **14**, 558181, <https://doi.org/10.3389/fncel.2020.558181>
- 201 Ozaki, K., Kato, D., Ikegami, A., Hashimoto, A., Sugio, S., Guo, Z. et al. (2020) Maternal immune activation induces sustained changes in fetal microglia motility. *Sci. Rep.* **10**, 21378, <https://doi.org/10.1038/s41598-020-78294-2>
- 202 Bruining, H., Hardstone, R., Juarez-Martinez, E.L., Sprengers, J., Avramiea, A.E. et al. (2020) Measurement of excitation-inhibition ratio in autism spectrum disorder using critical brain dynamics. *Sci. Rep.* **10**, 9195, <https://doi.org/10.1038/s41598-020-65500-4>
- 203 Calvin, O.L. and Redish, A.D. (2021) Global disruption in excitation-inhibition balance can cause localized network dysfunction and schizophrenia-like context-integration deficits. *PLoS Comput. Biol.* **17**, e1008985, <https://doi.org/10.1371/journal.pcbi.1008985>
- 204 Garbett, K.A., Hsiao, E.Y., Kálmán, S., Patterson, P.H. and Mirnics, K. (2012) Effects of maternal immune activation on gene expression patterns in the fetal brain. *Transl. Psychiatry* **2**, e98, <https://doi.org/10.1038/tp.2012.24>
- 205 Gao, R. and Penzes, P. (2015) Common mechanisms of excitatory and inhibitory imbalance in schizophrenia and autism spectrum disorders. *Curr. Mol. Med.* **15**, 146–167, <https://doi.org/10.2174/1566524015666150303003028>
- 206 Gogolla, N., Leblanc, J.J., Quast, K.B., Südhof, T.C., Fagioli, M. and Hensch, T.K. (2009) Common circuit defect of excitatory-inhibitory balance in mouse models of autism. *J. Neurodev. Disord.* **1**, 172–181, <https://doi.org/10.1007/s11689-009-9023-x>
- 207 Lewis, D.A. (2009) Neuroplasticity of excitatory and inhibitory cortical circuits in schizophrenia. *Dialogues Clin. Neurosci.* **11**, 269–280, <https://doi.org/10.31887/DCNS.2009.11.3/dalewis>
- 208 Krawczyk, M., Ramani, M., Dian, J., Florez, C.M., Mylvaganam, S., Brien, J. et al. (2016) Hippocampal hyperexcitability in fetal alcohol spectrum disorder: Pathological sharp waves and excitatory/inhibitory synaptic imbalance. *Exp. Neurol.* **280**, 70–79, <https://doi.org/10.1016/j.expneurol.2016.03.013>



- 209 Nomura, T. (2021) Interneuron Dysfunction and Inhibitory Deficits in Autism and Fragile X Syndrome. *Cells* **10**, 2610, <https://doi.org/10.3390/cells10102610>
- 210 Cea-Del Rio, C.A. and Huntsman, M.M. (2014) The contribution of inhibitory interneurons to circuit dysfunction in Fragile X Syndrome. *Front. Cell. Neurosci.* **8**, 245, <https://doi.org/10.3389/fncel.2014.00245>
- 211 Dienel, S.J. and Lewis, D.A. (2019) Alterations in cortical interneurons and cognitive function in schizophrenia. *Neurobiol. Dis.* **131**, 104208, <https://doi.org/10.1016/j.nbd.2018.06.020>
- 212 Seltén, M., van Bokhoven, H. and Nadif Kasri, N. (2018) Inhibitory control of the excitatory/inhibitory balance in psychiatric disorders. *F1000Res* **7**, 23, <https://doi.org/10.12688/f1000research.12155.1>
- 213 Ferguson, B.R. and Gao, W.J. (2018) PV Interneurons: Critical Regulators of E/I Balance for Prefrontal Cortex-Dependent Behavior and Psychiatric Disorders. *Front. Neural Circuits* **12**, 37, <https://doi.org/10.3389/fncir.2018.00037>
- 214 Donato, F., Chowdhury, A., Lahr, M. and Caroni, P. (2015) Early- and late-born parvalbumin basket cell subpopulations exhibiting distinct regulation and roles in learning. *Neuron* **85**, 770–786, <https://doi.org/10.1016/j.neuron.2015.01.011>
- 215 Lee, S.H., Schwaller, B. and Neher, E. (2000) Kinetics of Ca<sup>2+</sup> binding to parvalbumin in bovine chromaffin cells: implications for [Ca<sup>2+</sup>] transients of neuronal dendrites. *J. Physiol.* **525**, 419–432, <https://doi.org/10.1111/j.1469-7793.2000.t01-2-00419.x>
- 216 Qu, G.J., Ma, J., Yu, Y.C. and Fu, Y. (2016) Postnatal development of GABAergic interneurons in the neocortical subplate of mice. *Neuroscience* **322**, 78–93, <https://doi.org/10.1016/j.neuroscience.2016.02.023>
- 217 Ueno, H., Suemitsu, S., Okamoto, M., Matsumoto, Y. and Ishihara, T. (2017) Parvalbumin neurons and perineuronal nets in the mouse prefrontal cortex. *Neuroscience* **343**, 115–127, <https://doi.org/10.1016/j.neuroscience.2016.11.035>
- 218 Wu, Y.C., Du, X., van den Buuse, M. and Hill, R.A. (2014) Sex differences in the adolescent developmental trajectory of parvalbumin interneurons in the hippocampus: a role for estradiol. *Psychoneuroendocrinology* **45**, 167–178, <https://doi.org/10.1016/j.psyneuen.2014.03.016>
- 219 Ducharme, G., Lowe, G.C., Goutagny, R. and Williams, S. (2012) Early alterations in hippocampal circuitry and theta rhythm generation in a mouse model of prenatal infection: implications for schizophrenia. *PLoS ONE* **7**, e29754, <https://doi.org/10.1371/journal.pone.0029754>
- 220 Matsuura, A., Ishima, T., Fujita, Y., Iwayama, Y., Hasegawa, S., Kawahara-Miki, R. et al. (2018) Dietary glucoraphanin prevents the onset of psychosis in the adult offspring after maternal immune activation. *Sci. Rep.* **8**, 2158, <https://doi.org/10.1038/s41598-018-20538-3>
- 221 Shin Yim, Y., Park, A., Berrios, J., Lafourcade, M., Pascual, L.M., Soares, N. et al. (2017) Reversing behavioural abnormalities in mice exposed to maternal inflammation. *Nature* **549**, 482–487, <https://doi.org/10.1038/nature23909>
- 222 Rahman, T., Weickert, C.S., Harms, L., Meehan, C., Schall, U., Todd, J. et al. (2020) Effect of Immune Activation during Early Gestation or Late Gestation on Inhibitory Markers in Adult Male Rats. *Sci. Rep.* **10**, 1982, <https://doi.org/10.1038/s41598-020-58449-x>
- 223 Giovanoli, S., Weber, L. and Meyer, U. (2014) Single and combined effects of prenatal immune activation and peripubertal stress on parvalbumin and reelin expression in the hippocampal formation. *Brain Behav. Immun.* **40**, 48–54, <https://doi.org/10.1016/j.bbi.2014.04.005>
- 224 Nakamura, J.P., Schroeder, A., Gibbons, A., Sundram, S. and Hill, R.A. (2022) Timing of maternal immune activation and sex influence schizophrenia-relevant cognitive constructs and neuregulin and GABAergic pathways. *Brain Behav. Immun.* **100**, 70–82, <https://doi.org/10.1016/j.bbi.2021.11.006>
- 225 Nakamura, J.P., Gillespie, B., Gibbons, A., Jaehne, E.J., Du, X., Chan, A. et al. (2021) Maternal immune activation targeted to a window of parvalbumin interneuron development improves spatial working memory: Implications for autism. *Brain Behav. Immun.* **91**, 339–349, <https://doi.org/10.1016/j.bbi.2020.10.012>
- 226 Thion, M.S., Mosser, C.A., Férézou, I., Grisel, P., Baptista, S., Low, D. et al. (2019) Biphasic Impact of Prenatal Inflammation and Macrophage Depletion on the Wiring of Neocortical Inhibitory Circuits. *Cell Rep.* **28**, 1119.e4–1126.e4, <https://doi.org/10.1016/j.celrep.2019.06.086>
- 227 Vasistha, N.A., Pardo-Navarro, M., Gasthaus, J., Weijers, D., Müller, M.K., García-González, D. et al. (2020) Maternal inflammation has a profound effect on cortical interneuron development in a stage and subtype-specific manner. *Mol. Psychiatry* **25**, 2313–2329, <https://doi.org/10.1038/s41380-019-0539-5>
- 228 Oskvig, D.B., Elkahoul, A.G., Johnson, K.R., Phillips, T.M. and Herkenham, M. (2012) Maternal immune activation by LPS selectively alters specific gene expression profiles of interneuron migration and oxidative stress in the fetus without triggering a fetal immune response. *Brain Behav. Immun.* **26**, 623–634, <https://doi.org/10.1016/j.bbi.2012.01.015>
- 229 Squarzon, P., Oller, G., Hoeffel, G., Pont-Lezica, L., Rostaing, P., Low, D. et al. (2014) Microglia modulate wiring of the embryonic forebrain. *Cell Rep.* **8**, 1271–1279, <https://doi.org/10.1016/j.celrep.2014.07.042>
- 230 Gumusoglu, S.B., Fine, R.S., Murray, S.J., Bittle, J.L. and Stevens, H.E. (2017) The role of IL-6 in neurodevelopment after prenatal stress. *Brain Behav. Immun.* **65**, 274–283, <https://doi.org/10.1016/j.bbi.2017.05.015>
- 231 Piontkewitz, Y., Bernstein, H.G., Dobrowolny, H., Bogerts, B., Weiner, I. and Keilhoff, G. (2012) Effects of risperidone treatment in adolescence on hippocampal neurogenesis, parvalbumin expression, and vascularization following prenatal immune activation in rats. *Brain Behav. Immun.* **26**, 353–363, <https://doi.org/10.1016/j.bbi.2011.11.004>
- 232 Zhang, Z. and van Praag, H. (2015) Maternal immune activation differentially impacts mature and adult-born hippocampal neurons in male mice. *Brain Behav. Immun.* **45**, 60–70, <https://doi.org/10.1016/j.bbi.2014.10.010>
- 233 Wischhof, L., Irrsack, E., Osorio, C. and Koch, M. (2015) Prenatal LPS-exposure—a neurodevelopmental rat model of schizophrenia—differentially affects cognitive functions, myelination and parvalbumin expression in male and female offspring. *Prog. Neuropsychopharmacol. Biol. Psychiatry* **57**, 17–30, <https://doi.org/10.1016/j.pnpbp.2014.10.004>
- 234 Luoni, A., Richetto, J., Longo, L. and Riva, M.A. (2017) Chronic lurasidone treatment normalizes GABAergic marker alterations in the dorsal hippocampus of mice exposed to prenatal immune activation. *Eur. Neuropsychopharmacol.* **27**, 170–179, <https://doi.org/10.1016/j.euroneuro.2016.12.001>

- 235 Paylor, J.W., Lins, B.R., Greba, Q., Moen, N., de Moraes, R.S., Howland, J.G. et al. (2016) Developmental disruption of perineuronal nets in the medial prefrontal cortex after maternal immune activation. *Sci. Rep.* **6**, 37580, <https://doi.org/10.1038/srep37580>
- 236 Dickerson, D.D., Overeem, K.A., Wolff, A.R., Williams, J.M., Abraham, W.C. and Bilkey, D.K. (2014) Association of aberrant neural synchrony and altered GAD67 expression following exposure to maternal immune activation, a risk factor for schizophrenia. *Transl. Psychiatry* **4**, e418, <https://doi.org/10.1038/tp.2014.64>
- 237 Gonzalez-Burgos, G. and Lewis, D.A. (2008) GABA neurons and the mechanisms of network oscillations: implications for understanding cortical dysfunction in schizophrenia. *Schizophr. Bull.* **34**, 944–961, <https://doi.org/10.1093/schbul/sbn070>
- 238 Erlander, M.G., Tillakaratne, N.J., Feldblum, S., Patel, N. and Tobin, A.J. (1991) Two genes encode distinct glutamate decarboxylases. *Neuron* **7**, 91–100, [https://doi.org/10.1016/0896-6273\(91\)90077-D](https://doi.org/10.1016/0896-6273(91)90077-D)
- 239 Richetto, J., Calabrese, F., Riva, M.A. and Meyer, U. (2014) Prenatal immune activation induces maturation-dependent alterations in the prefrontal GABAergic transcriptome. *Schizophr. Bull.* **40**, 351–361, <https://doi.org/10.1093/schbul/sbs195>
- 240 Richetto, J., Calabrese, F., Meyer, U. and Riva, M.A. (2013) Prenatal versus postnatal maternal factors in the development of infection-induced working memory impairments in mice. *Brain Behav. Immun.* **33**, 190–200, <https://doi.org/10.1016/j.bbi.2013.07.006>
- 241 Labouesse, M.A., Dong, E., Grayson, D.R., Guidotti, A. and Meyer, U. (2015) Maternal immune activation induces GAD1 and GAD2 promoter remodeling in the offspring prefrontal cortex. *Epigenetics* **10**, 1143–1155, <https://doi.org/10.1080/15592294.2015.1114202>
- 242 Nouel, D., Burt, M., Zhang, Y., Harvey, L. and Boksa, P. (2012) Prenatal exposure to bacterial endotoxin reduces the number of GAD67- and reelin-immunoreactive neurons in the hippocampus of rat offspring. *Eur. Neuropsychopharmacol.* **22**, 300–307, <https://doi.org/10.1016/j.euroneuro.2011.08.001>
- 243 Deslauriers, J., Larouche, A., Sarret, P. and Grignon, S. (2013) Combination of prenatal immune challenge and restraint stress affects prepulse inhibition and dopaminergic/GABAergic markers. *Prog. Neuropsychopharmacol. Biol. Psychiatry* **45**, 156–164, <https://doi.org/10.1016/j.pnpbp.2013.05.006>
- 244 Cassella, S.N., Hemmerle, A.M., Lundgren, K.H., Kyser, T.L., Ahlbrand, R., Bronson, S.L. et al. (2016) Maternal immune activation alters glutamic acid decarboxylase-67 expression in the brains of adult rat offspring. *Schizophr. Res.* **171**, 195–199, <https://doi.org/10.1016/j.schres.2016.01.041>
- 245 Fatemi, S.H., Araghi-Niknam, M., Laurence, J.A., Stary, J.M., Sidwell, R.W. and Lee, S. (2004) Glial fibrillary acidic protein and glutamic acid decarboxylase 65 and 67 kDa proteins are increased in brains of neonatal BALB/c mice following viral infection in utero. *Schizophr. Res.* **69**, 121–123, [https://doi.org/10.1016/S0920-9964\(03\)00175-0](https://doi.org/10.1016/S0920-9964(03)00175-0)
- 246 Harvey, L. and Boksa, P. (2012) A stereological comparison of GAD67 and reelin expression in the hippocampal stratum oriens of offspring from two mouse models of maternal inflammation during pregnancy. *Neuropharmacology* **62**, 1767–1776, <https://doi.org/10.1016/j.neuropharm.2011.11.022>
- 247 Soumiya, H., Fukumitsu, H. and Furukawa, S. (2011) Prenatal immune challenge compromises development of upper-layer but not deeper-layer neurons of the mouse cerebral cortex. *J. Neurosci. Res.* **89**, 1342–1350, <https://doi.org/10.1002/jnr.22636>
- 248 Canetta, S., Bolkan, S., Padilla-Coreano, N., Song, L.J., Sahn, R., Harrison, N.L. et al. (2016) Maternal immune activation leads to selective functional deficits in offspring parvalbumin interneurons. *Mol. Psychiatry* **21**, 956–968, <https://doi.org/10.1038/mp.2015.222>
- 249 Wei, H., Chadman, K.K., McCloskey, D.P., Sheikh, A.M., Malik, M., Brown, W.T. et al. (2012) Brain IL-6 elevation causes neuronal circuitry imbalances and mediates autism-like behaviors. *Biochim. Biophys. Acta* **1822**, 831–842, <https://doi.org/10.1016/j.bbdis.2012.01.011>
- 250 Roenker, N.L., Gudelsky, G., Ahlbrand, R., Bronson, S.L., Kern, J.R., Waterman, H. et al. (2011) Effect of paliperidone and risperidone on extracellular glutamate in the prefrontal cortex of rats exposed to prenatal immune activation or MK-801. *Neurosci. Lett.* **500**, 167–171, <https://doi.org/10.1016/j.neulet.2011.06.011>
- 251 Bitanhirwe, B.K., Peleg-Raibstein, D., Mouttet, F., Feldon, J. and Meyer, U. (2010) Late prenatal immune activation in mice leads to behavioral and neurochemical abnormalities relevant to the negative symptoms of schizophrenia. *Neuropsychopharmacology* **35**, 2462–2478, <https://doi.org/10.1038/npp.2010.129>
- 252 Cavalli, G. and Heard, E. (2019) Advances in epigenetics link genetics to the environment and disease. *Nature* **571**, 489–499, <https://doi.org/10.1038/s41586-019-1411-0>
- 253 Reichard, J. and Zimmer-Bensch, G. (2021) The Epigenome in Neurodevelopmental Disorders. *Front. Neurosci.* **15**, 776809, <https://doi.org/10.3389/fnins.2021.776809>
- 254 Basil, P., Li, Q., Gui, H., Hui, T.C.K., Ling, V.H.M., Wong, C.C.Y. et al. (2018) Prenatal immune activation alters the adult neural epigenome but can be partly stabilised by a n-3 polyunsaturated fatty acid diet. *Transl. Psychiatry* **8**, 125, <https://doi.org/10.1038/s41398-018-0167-x>
- 255 Fagioli, M., Jensen, C.L. and Champagne, F.A. (2009) Epigenetic influences on brain development and plasticity. *Curr. Opin. Neurobiol.* **19**, 207–212, <https://doi.org/10.1016/j.conb.2009.05.009>
- 256 Bale, T.L. (2015) Epigenetic and transgenerational reprogramming of brain development. *Nat. Rev. Neurosci.* **16**, 332–344, <https://doi.org/10.1038/nrn3818>
- 257 Akbarian, S. (2014) Epigenetic mechanisms in schizophrenia. *Dialogues Clin. Neurosci.* **16**, 405–417, <https://doi.org/10.31887/DCNS.2014.16.3/sakbarian>
- 258 Braconi, C., Huang, N. and Patel, T. (2010) MicroRNA-dependent regulation of DNA methyltransferase-1 and tumor suppressor gene expression by interleukin-6 in human malignant cholangiocytes. *Hepatology* **51**, 881–890, <https://doi.org/10.1002/hep.23381>
- 259 Guarneri, G., Sarchielli, E., Comeglio, P., Herrera-Puerta, E., Piaceri, I., Nacmias, B. et al. (2020) Tumor Necrosis Factor  $\alpha$  Influences Phenotypic Plasticity and Promotes Epigenetic Changes in Human Basal Forebrain Cholinergic Neuroblasts. *Int. J. Mol. Sci.* **21**, 6128, <https://doi.org/10.3390/ijms21176128>
- 260 Hodge, D.R., Xiao, W., Clausen, P.A., Heidecker, G., Szyf, M. and Farrar, W.L. (2001) Interleukin-6 regulation of the human DNA methyltransferase (HDNMT) gene in human erythroleukemia cells. *J. Biol. Chem.* **276**, 39508–39511, <https://doi.org/10.1074/jbc.C100343200>

- 261 Seutter, S., Winfield, J., Esbitt, A., Snyder, S., Magner, A., Kim, K. et al. (2020) Interleukin 1 $\beta$  and Prostaglandin E2 affect expression of DNA methylating and demethylating enzymes in human gingival fibroblasts. *Int. Immunopharmacol.* **78**, 105920, <https://doi.org/10.1016/j.intimp.2019.105920>
- 262 Allen, N.D. (2008) Temporal and epigenetic regulation of neurodevelopmental plasticity. *Philos. Trans. R. Soc. Lond. B Biol. Sci.* **363**, 23–38, <https://doi.org/10.1098/rstb.2006.2010>
- 263 Bergdolt, L. and Dunaevsky, A. (2019) Brain changes in a maternal immune activation model of neurodevelopmental brain disorders. *Prog. Neurobiol.* **175**, 1–19, <https://doi.org/10.1016/j.pneurobio.2018.12.002>
- 264 Klose, R.J. and Bird, A.P. (2006) Genomic DNA methylation: the mark and its mediators. *Trends Biochem. Sci.* **31**, 89–97, <https://doi.org/10.1016/j.tibs.2005.12.008>
- 265 Kirkbride, J.B., Susser, E., Kundakovic, M., Kresovich, J.K., Davey Smith, G. and Relton, C.L. (2012) Prenatal nutrition, epigenetics and schizophrenia risk: can we test causal effects? *Epigenomics* **4**, 303–315, <https://doi.org/10.2217/epi.12.20>
- 266 Luo, C., Keown, C.L., Kurihara, L., Zhou, J., He, Y., Li, J. et al. (2017) Single-cell methylomes identify neuronal subtypes and regulatory elements in mammalian cortex. *Science* **357**, 600–604, <https://doi.org/10.1126/science.aan3351>
- 267 Alaskhar Alhamwe, B., Khalaila, R., Wolf, J., von Bülow, V., Harb, H., Alhamdan, F. et al. (2018) Histone modifications and their role in epigenetics of atopy and allergic diseases. *Allergy Asthma Clin. Immunol.* **14**, 39, <https://doi.org/10.1186/s13223-018-0259-4>
- 268 Ramazi, S., Allahverdi, A. and Zahiri, J. (2020) Evaluation of post-translational modifications in histone proteins: A review on histone modification defects in developmental and neurological disorders. *J. Biosci.* **45**, 1–29, <https://doi.org/10.1007/s12038-020-00099-2>
- 269 Zentner, G.E. and Henikoff, S. (2013) Regulation of nucleosome dynamics by histone modifications. *Nat. Struct. Mol. Biol.* **20**, 259–266, <https://doi.org/10.1038/nsmb.2470>
- 270 Zhao, S., Zhang, X. and Li, H. (2018) Beyond histone acetylation—writing and erasing histone acylations. *Curr. Opin. Struct. Biol.* **53**, 169–177, <https://doi.org/10.1016/j.sbi.2018.10.001>
- 271 Jambhekar, A., Dhall, A. and Shi, Y. (2019) Roles and regulation of histone methylation in animal development. *Nat. Rev. Mol. Cell Biol.* **20**, 625–641, <https://doi.org/10.1038/s41580-019-0151-1>
- 272 Farrelly, L.A. and Maze, I. (2019) An emerging perspective on ‘histone code’ mediated regulation of neural plasticity and disease. *Curr. Opin. Neurobiol.* **59**, 157–163, <https://doi.org/10.1016/j.conb.2019.07.001>
- 273 Rando, O.J. (2012) Combinatorial complexity in chromatin structure and function: revisiting the histone code. *Curr. Opin. Genet. Dev.* **22**, 148–155, <https://doi.org/10.1016/j.gde.2012.02.013>
- 274 Rossetto, D., Avvakumov, N. and Côté, J. (2012) Histone phosphorylation: a chromatin modification involved in diverse nuclear events. *Epigenetics* **7**, 1098–1108, <https://doi.org/10.4161/epi.21975>
- 275 Salinas, R.D., Connolly, D.R. and Song, H. (2020) Invited review: epigenetics in neurodevelopment. *Neuropathol. Appl. Neurobiol.* **46**, 6–27, <https://doi.org/10.1111/nan.12608>
- 276 Reisinger, S.N., Kong, E., Khan, D., Schulz, S., Ronovsky, M., Berger, S. et al. (2016) Maternal immune activation epigenetically regulates hippocampal serotonin transporter levels. *Neurobiol. Stress* **4**, 34–43, <https://doi.org/10.1016/j.ynstr.2016.02.007>
- 277 Tang, B., Jia, H., Kast, R.J. and Thomas, E.A. (2013) Epigenetic changes at gene promoters in response to immune activation in utero *Brain Behav. Immun.* **30**, 168–175
- 278 Pujol Lopez, Y., Kenis, G., Stettinger, W., Neumeier, K., de Jonge, S., Steinbusch, H.W. et al. (2016) Effects of prenatal Poly I: C exposure on global histone deacetylase (HDAC) and DNA methyltransferase (DNMT) activity in the mouse brain. *Mol. Biol. Rep.* **43**, 711–717, <https://doi.org/10.1007/s11033-016-4006-y>
- 279 Karmodiya, K., Krebs, A.R., Oulad-Abdelghani, M., Kimura, H. and Tora, L. (2012) H3K9 and H3K14 acetylation co-occur at many gene regulatory elements, while H3K14ac marks a subset of inactive inducible promoters in mouse embryonic stem cells. *BMC Genomics* **13**, 424, <https://doi.org/10.1186/1471-2164-13-424>
- 280 Yan, C. and Boyd, D.D. (2006) Histone H3 acetylation and H3 K4 methylation define distinct chromatin regions permissive for transgene expression. *Mol. Cell. Biol.* **26**, 6357–6371, <https://doi.org/10.1128/MCB.00311-06>
- 281 Connor, C.M., Dincer, A., Straubhaar, J., Galler, J.R., Houston, I.B. and Akbarian, S. (2012) Maternal immune activation alters behavior in adult offspring, with subtle changes in the cortical transcriptome and epigenome. *Schizophr. Res.* **140**, 175–184, <https://doi.org/10.1016/j.schres.2012.06.037>
- 282 Huang, C., Xu, M. and Zhu, B. (2013) Epigenetic inheritance mediated by histone lysine methylation: maintaining transcriptional states without the precise restoration of marks? *Philos. Trans. R. Soc. Lond. B Biol. Sci.* **368**, 20110332, <https://doi.org/10.1098/rstb.2011.0332>
- 283 Zhang, Q., Xue, P., Li, H., Bao, Y., Wu, L., Chang, S. et al. (2013) Histone modification mapping in human brain reveals aberrant expression of histone H3 lysine 79 dimethylation in neural tube defects. *Neurobiol. Dis.* **54**, 404–413, <https://doi.org/10.1016/j.nbd.2013.01.014>
- 284 Singh, G., Singh, V. and Schneider, J.S. (2019) Post-translational histone modifications and their interaction with sex influence normal brain development and elaboration of neuropsychiatric disorders. *Biochim. Biophys. Acta Mol. Basis Dis.* **1865**, 1968–1981, <https://doi.org/10.1016/j.bbadis.2018.10.016>
- 285 Wang, K.C. and Chang, H.Y. (2011) Molecular mechanisms of long noncoding RNAs. *Mol. Cell* **43**, 904–914, <https://doi.org/10.1016/j.molcel.2011.08.018>
- 286 Huang, Y., Zhang, J.L., Yu, X.L., Xu, T.S., Wang, Z.B. and Cheng, X.C. (2013) Molecular functions of small regulatory noncoding RNA. *Biochemistry (Mosc)* **78**, 221–230, <https://doi.org/10.1134/S0006297913030024>
- 287 Qin, C., Xu, P.P., Zhang, X., Zhang, C., Liu, C.B., Yang, D.G. et al. (2020) Pathological significance of tRNA-derived small RNAs in neurological disorders. *Neural Regen. Res.* **15**, 212–221, <https://doi.org/10.4103/1673-5374.265560>

- 288 Bartel, D.P. (2004) MicroRNAs: genomics, biogenesis, mechanism, and function. *Cell* **116**, 281–297, [https://doi.org/10.1016/S0092-8674\(04\)00045-5](https://doi.org/10.1016/S0092-8674(04)00045-5)
- 289 Brennecke, J., Stark, A., Russell, R.B. and Cohen, S.M. (2005) Principles of microRNA-target recognition. *PLoS Biol.* **3**, e85, <https://doi.org/10.1371/journal.pbio.0030085>
- 290 Krek, A., Grün, D., Poy, M.N., Wolf, R., Rosenberg, L., Epstein, E.J. et al. (2005) Combinatorial microRNA target predictions. *Nat. Genet.* **37**, 495–500, <https://doi.org/10.1038/ng1536>
- 291 Xie, X., Lu, J., Kulbokas, E.J., Golub, T.R., Mootha, V., Lindblad-Toh, K. et al. (2005) Systematic discovery of regulatory motifs in human promoters and 3' UTRs by comparison of several mammals. *Nature* **434**, 338–345, <https://doi.org/10.1038/nature03441>
- 292 Qureshi, I.A. and Mehler, M.F. (2012) Emerging roles of non-coding RNAs in brain evolution, development, plasticity and disease. *Nat. Rev. Neurosci.* **13**, 528–541, <https://doi.org/10.1038/nrn3234>
- 293 Krichevsky, A.M., King, K.S., Donahue, C.P., Khrapko, K. and Kosik, K.S. (2003) A microRNA array reveals extensive regulation of microRNAs during brain development. *RNA* **9**, 1274–1281, <https://doi.org/10.1261/ma.5980303>
- 294 Bond, A.M., Vangompel, M.J., Sametsky, E.A., Clark, M.F., Savage, J.C., Disterhoft, J.F. et al. (2009) Balanced gene regulation by an embryonic brain ncRNA is critical for adult hippocampal GABA circuitry. *Nat. Neurosci.* **12**, 1020–1027, <https://doi.org/10.1038/nn.2371>
- 295 Dugas, J.C., Cuellar, T.L., Scholze, A., Ason, B., Ibrahim, A., Emery, B. et al. (2010) Dicer1 and miR-219 are required for normal oligodendrocyte differentiation and myelination. *Neuron* **65**, 597–611, <https://doi.org/10.1016/j.neuron.2010.01.027>
- 296 Delaloy, C., Liu, L., Lee, J.A., Su, H., Shen, F., Yang, G.Y. et al. (2010) MicroRNA-9 coordinates proliferation and migration of human embryonic stem cell-derived neural progenitors. *Cell Stem Cell* **6**, 323–335, <https://doi.org/10.1016/j.stem.2010.02.015>
- 297 Zhao, C., Sun, G.Q., Li, S.X. and Shi, Y.H. (2009) A feedback regulatory loop involving microRNA-9 and nuclear receptor TLX in neural stem cell fate determination. *Nat. Struct. Mol. Biol.* **16**, 365–371, <https://doi.org/10.1038/nsmb.1576>
- 298 Makeyev, E.V., Zhang, J.W., Carrasco, M.A. and Maniatis, T. (2007) The MicroRNA miR-124 promotes neuronal differentiation by triggering brain-specific alternative pre-mRNA splicing. *Mol. Cell* **27**, 435–448, <https://doi.org/10.1016/j.molcel.2007.07.015>
- 299 Visvanathan, J., Lee, S., Lee, B., Lee, J.W. and Lee, S.K. (2007) The microRNA miR-124 antagonizes the anti-neural REST/SCP1 pathway during embryonic CNS development. *Genes Dev.* **21**, 744–749, <https://doi.org/10.1101/gad.1519107>
- 300 Hollins, S.L., Zavitsanos, K., Walker, F.R. and Cairns, M.J. (2014) Alteration of imprinted DIK1-Dio3 miRNA cluster expression in the entorhinal cortex induced by maternal immune activation and adolescent cannabinoid exposure. *Transl. Psychiatry* **4**, e452, <https://doi.org/10.1038/tp.2014.99>
- 301 Berger, S., Ronovsky, M., Horvath, O., Berger, A. and Pollak, D.D. (2018) Impact of maternal immune activation on maternal care behavior, offspring emotionality and intergenerational transmission in C3H/He mice. *Brain Behav. Immun.* **70**, 131–140, <https://doi.org/10.1016/j.bbi.2018.02.008>
- 302 Sunwoo, J.S., Jeon, D., Lee, S.T., Moon, J., Yu, J.S., Park, D.K. et al. (2018) Maternal immune activation alters brain microRNA expression in mouse offspring. *Ann. Clin. Transl. Neurol.* **5**, 1264–1276, <https://doi.org/10.1002/acn3.652>
- 303 Su, Z., Frost, E.L., Lammert, C.R., Przanowska, R.K., Lukens, J.R. and Dutta, A. (2020) tRNA-derived fragments and microRNAs in the maternal-fetal interface of a mouse maternal-immune-activation autism model. *RNA Biol.* **17**, 1183–1195, <https://doi.org/10.1080/15476286.2020.1721047>
- 304 Wastnedge, E.A.N., Reynolds, R.M., van Boeckel, S.R., Stock, S.J., Denison, F.C., Maybin, J.A. et al. (2021) Pregnancy and COVID-19. *Physiol. Rev.* **101**, 303–318, <https://doi.org/10.1152/physrev.00024.2020>
- 305 Knight, M., Bunch, K., Vousden, N., Morris, E., Simpson, N., Gale, C. et al. (2020) Characteristics and outcomes of pregnant women admitted to hospital with confirmed SARS-CoV-2 infection in UK: national population based cohort study. *BMJ* **369**, m2107, <https://doi.org/10.1136/bmj.m2107>
- 306 Allotey, J., Stallings, E., Bonet, M., Yap, M., Chatterjee, S., Kew, T. et al. (2020) Clinical manifestations, risk factors, and maternal and perinatal outcomes of coronavirus disease 2019 in pregnancy: living systematic review and meta-analysis. *BMJ* **370**, m3320, <https://doi.org/10.1136/bmj.m3320>
- 307 Villar, J., Ariff, S., Gunier, R.B., Thiruvengadam, R., Rauch, S., Kholin, A. et al. (2021) Maternal and neonatal morbidity and mortality among pregnant women with and without COVID-19 infection: The INTERCOVID Multinational Cohort Study. *JAMA Pediatr* **175**, 817–826, <https://doi.org/10.1001/jamapediatrics.2021.1050>
- 308 Norman, M., Navér, L., Söderling, J., Ahlberg, M., Hervius Asklung, H., Aronsson, B. et al. (2021) Association of maternal SARS-CoV-2 infection in pregnancy with neonatal outcomes. *JAMA* **325**, 2076–2086, <https://doi.org/10.1001/jama.2021.5775>
- 309 Shook, L.L., Sullivan, E.L., Lo, J.O., Perlis, R.H. and Edlow, A.G. (2022) COVID-19 in pregnancy: implications for fetal brain development. *Trends Mol. Med.* **28**, 319–330, <https://doi.org/10.1016/j.molmed.2022.02.004>
- 310 Dubey, H., Sharma, R.K., Krishnan, S. and Knickmeyer, R. (2022) SARS-CoV-2 (COVID-19) as a possible risk factor for neurodevelopmental disorders. *Front. Neurosci.* **16**, 1021721, <https://doi.org/10.3389/fnins.2022.1021721>
- 311 Firestein, M.R., Dumitriu, D., Marsh, R. and Monk, C. (2022) Maternal mental health and infant development during the COVID19 pandemic. *JAMA Psychiatry* **79**, 1040–1045, <https://doi.org/10.1001/jamapsychiatry.2022.2591>
- 312 Ray, S.T.J., Abdel-Mannan, O., Sa, M., Fuller, C., Wood, G.K., Pysden, K. et al. (2021) Neurological manifestations of SARS-CoV-2 infection in hospitalised children and adolescents in the UK: a prospective national cohort study. *Lancet Child Adolesc. Health* **5**, 631–641, [https://doi.org/10.1016/S2352-4642\(21\)00193-0](https://doi.org/10.1016/S2352-4642(21)00193-0)
- 313 Argueta, L.B., Lacko, L.A., Bram, Y., Tada, T., Carrau, L., Rendeiro, A.F. et al. (2022) Inflammatory responses in the placenta upon SARS-CoV-2 infection late in pregnancy. *iScience* **25**, 104223, <https://doi.org/10.1016/j.isci.2022.104223>
- 314 Vivanti, A.J., Vauloup-Fellous, C., Prevot, S., Zupan, V., Suffee, C., Do Cao, J. et al. (2020) Transplacental transmission of SARS-CoV-2 infection. *Nat. Commun.* **11**, 3572, <https://doi.org/10.1038/s41467-020-17436-6>
- 315 Fenizia, C., Biasin, M., Cetin, I., Vergani, P., Mileto, D., Spinillo, A. et al. (2020) Analysis of SARS-CoV-2 vertical transmission during pregnancy. *Nat. Commun.* **11**, 5128, <https://doi.org/10.1038/s41467-020-18933-4>



- 316 Dube, R. and Kar, S.S. (2020) COVID-19 in pregnancy: the foetal perspective - a systematic review. *BMJ Paediatr. Open* **4**, e000859, <https://doi.org/10.1136/bmjpo-2020-000859>
- 317 Mahyuddin, A.P., Kanneganti, A., Wong, J.J.L., Dimri, P.S., Su, L.L., Biswas, A. et al. (2020) Mechanisms and evidence of vertical transmission of infections in pregnancy including SARS-CoV-2s. *Prenat. Diag.* **40**, 1655–1670, <https://doi.org/10.1002/pd.5765>
- 318 Han, V.X., Patel, S., Jones, H.F., Nielsen, T.C., Mohammad, S.S., Hofer, M.J. et al. (2021) Maternal acute and chronic inflammation in pregnancy is associated with common neurodevelopmental disorders: systematic review. *Transl. Psychiatry* **11**, 71, <https://doi.org/10.1038/s41398-021-01198-w>
- 319 Taglauer, E.S., Dhole, Y., Boateng, J., Snyder-Cappione, J., Parker, S.E., Clarke, K. et al. (2022) Evaluation of maternal-infant dyad inflammatory cytokines in pregnancies affected by maternal SARS-CoV-2 infection in early and late gestation. *J. Perinatol.* **42**, 1319–1327, <https://doi.org/10.1038/s41372-022-01391-9>
- 320 Shook, L.L., Fourman, L.T. and Edlow, A.G. (2022) Immune Responses to SARS-CoV-2 in Pregnancy: Implications for the Health of the Next Generation. *J. Immunol.* **209**, 1465–1473, <https://doi.org/10.4049/jimmunol.2200414>
- 321 Garcia-Flores, V., Romero, R., Xu, Y., Theis, K.R., Arenas-Hernandez, M., Miller, D. et al. (2022) Maternal-fetal immune responses in pregnant women infected with SARS-CoV-2. *Nat. Commun.* **13**, 320, <https://doi.org/10.1038/s41467-021-27745-z>
- 322 Hoffmann, M., Kleine-Weber, H., Schroeder, S., Krüger, N., Herlier, T., Erichsen, S. et al. (2020) SARS-CoV-2 Cell Entry Depends on ACE2 and TMPRSS2 and Is Blocked by a Clinically Proven Protease Inhibitor. *Cell* **181**, 271.e8–280.e8, <https://doi.org/10.1016/j.cell.2020.02.052>
- 323 Lu-Culligan, A., Chavan, A.R., Vijayakumar, P., Irshaid, L., Courchaine, E.M., Milano, K.M. et al. (2021) Maternal respiratory SARS-CoV-2 infection in pregnancy is associated with a robust inflammatory response at the maternal-fetal interface. *Med* **2**, 591.e10–610.e10, <https://doi.org/10.1016/j.medj.2021.04.016>
- 324 Otero, M. and Antonson, A.M. (2022) At the crux of maternal immune activation: viruses, microglia, microbes, and IL-17A. *Immunol. Rev.* **311**, 205–223, <https://doi.org/10.1111/immr.13125>
- 325 Al-Haddad, B.J.S., Jacobsson, B., Chabra, S., Modzelewska, D., Olson, E.M., Bernier, R. et al. (2019) Long-term Risk of Neuropsychiatric Disease After Exposure to Infection In Utero. *JAMA Psychiatry* **76**, 594–602, <https://doi.org/10.1001/jamapsychiatry.2019.0029>
- 326 Tanacan, A., Yazihan, N., Erol, S.A., Anuk, A.T., Yucel Yetiskin, F.D., Biriken, D. et al. (2021) The impact of COVID-19 infection on the cytokine profile of pregnant women: A prospective case-control study. *Cytokine* **140**, 155431, <https://doi.org/10.1016/j.cyto.2021.155431>
- 327 Dammann, O. and Leviton, A. (1997) Maternal intrauterine infection, cytokines, and brain damage in the preterm newborn. *Pediatr. Res.* **42**, 1–8, <https://doi.org/10.1203/00006450-199707000-00001>
- 328 Mittendorf, R., Montag, A.G., MacMillan, W., Janeczek, S., Pryde, P.G., Besinger, R.E. et al. (2003) Components of the systemic fetal inflammatory response syndrome as predictors of impaired neurologic outcomes in children. *Am. J. Obstet. Gynecol.* **188**, 1438–1444, <https://doi.org/10.1067/mob.2003.380>
- 329 Yoon, B.H., Park, C.W. and Chaiworapongsa, T. (2003) Intrauterine infection and the development of cerebral palsy. *BJOG* **110**, 124–127, <https://doi.org/10.1046/j.1471-0528.2003.00063.x>
- 330 Gee, S., Chandiramani, M., Seow, J., Pollock, E., Modestini, C., Das, A. et al. (2021) The legacy of maternal SARS-CoV-2 infection on the immunology of the neonate. *Nat. Immunol.* **22**, 1490–1502, <https://doi.org/10.1038/s41590-021-01049-2>
- 331 Kienast, P., Prayer, D., Binder, J., Prayer, F., Dekan, S., Langthaler, E. et al. (2023) SARS-CoV-2 variant-related abnormalities detected by prenatal MRI: a prospective case-control study. *Lancet Reg. Health Eur.* **26**, 100587, <https://doi.org/10.1016/j.lanepe.2023.100587>
- 332 Huang, P., Zhou, F., Guo, Y., Yuan, S., Lin, S., Lu, J. et al. (2021) Association Between the COVID-19 Pandemic and Infant Neurodevelopment: A Comparison Before and During COVID-19. *Front. Pediatr.* **9**, 662165, <https://doi.org/10.3389/fped.2021.662165>
- 333 Wang, Y., Chen, L., Wu, T., Shi, H., Li, Q., Jiang, H. et al. (2020) Impact of Covid-19 in pregnancy on mother's psychological status and infant's neurobehavioral development: a longitudinal cohort study in China. *BMC Med.* **18**, 347, <https://doi.org/10.1186/s12916-020-01825-1>
- 334 Davies, C., Hendry, A., Gibson, S.P., Gliga, T., McGillion, M. and Gonzalez-Gomez, N. (2021) Early childhood education and care (ECEC) during COVID-19 boosts growth in language and executive function. *Infant Child Dev.* **30**, e2241, <https://doi.org/10.1002/icd.2241>
- 335 Edlow, A.G., Castro, V.M., Shook, L.L., Kaimal, A.J. and Perlis, R.H. (2022) Neurodevelopmental Outcomes at 1 Year in Infants of Mothers Who Tested Positive for SARS-CoV-2 During Pregnancy. *JAMA Netw. Open* **5**, e2215787, <https://doi.org/10.1001/jamanetworkopen.2022.15787>
- 336 Shuffrey, L.C., Firestein, M.R., Kyle, M.H., Fields, A., Alcántara, C., Amso, D. et al. (2022) Association of Birth During the COVID-19 Pandemic With Neurodevelopmental Status at 6 Months in Infants With and Without In Utero Exposure to Maternal SARS-CoV-2 Infection. *JAMA Pediatr.* **176**, e215563, <https://doi.org/10.1001/jamapediatrics.2021.5563>
- 337 Metz, T.D. (2022) Is It Exposure to the Pandemic or to Maternal SARS-CoV-2 Infection That Is Adversely Affecting Early Childhood Neurodevelopment? *JAMA Netw. Open* **5**, e2215793, <https://doi.org/10.1001/jamanetworkopen.2022.15793>
- 338 Ayed, M., Embaireeg, A., Kartam, M., More, K., Alqallaf, M., AlNafisi, A. et al. (2022) Neurodevelopmental outcomes of infants born to mothers with SARS-CoV-2 infections during pregnancy: a national prospective study in Kuwait. *BMC Pediatr.* **22**, 319, <https://doi.org/10.1186/s12887-022-03359-2>
- 339 Aldrete-Cortez, V., Bobadilla, L., Tafoya, S.A., Gonzalez-Carpintero, A., Nava, F., Viñals, C. et al. (2022) Infants prenatally exposed to SARS-CoV-2 show the absence of fidgety movements and are at higher risk for neurological disorders: A comparative study. *PLoS ONE* **17**, e0267575, <https://doi.org/10.1371/journal.pone.0267575>
- 340 Hessami, K., Norooznezhad, A.H., Monteiro, S., Barrozo, E.R., Abdolmaleki, A.S., Arian, S.E. et al. (2022) COVID-19 Pandemic and Infant Neurodevelopmental Impairment: A Systematic Review and Meta-analysis. *JAMA Netw. Open* **5**, e2238941, <https://doi.org/10.1001/jamanetworkopen.2022.38941>
- 341 Lavallée, A. and Dumitriu, D. (2022) Low Risk of Neurodevelopmental Impairment in the COVID-19 Generation Should Not Make Researchers Complacent. *JAMA Netw. Open* **5**, e2238958, <https://doi.org/10.1001/jamanetworkopen.2022.38958>

- 342 Lipina, T.V., Zai, C., Hloušek, D., Roder, J.C. and Wong, A.H. (2013) Maternal immune activation during gestation interacts with Disc1 point mutation to exacerbate schizophrenia-related behaviors in mice. *J. Neurosci.* **33**, 7654–7666, <https://doi.org/10.1523/JNEUROSCI.0091-13.2013>
- 343 Meyer, U., Nyffeler, M., Engler, A., Urwyler, A., Schedlowski, M., Knuesel, I. et al. (2006) The time of prenatal immune challenge determines the specificity of inflammation-mediated brain and behavioral pathology. *J. Neurosci.* **26**, 4752–4762, <https://doi.org/10.1523/JNEUROSCI.0099-06.2006>
- 344 Abazyan, B., Nomura, J., Kannan, G., Ishizuka, K., Tamashiro, K.L., Nucifora, F. et al. (2010) Prenatal interaction of mutant DISC1 and immune activation produces adult psychopathology. *Biol. Psychiatry* **68**, 1172–1181, <https://doi.org/10.1016/j.biopsych.2010.09.022>
- 345 Arrode-Bruses, G. and Bruses, J.L. (2012) Maternal immune activation by poly I:C induces expression of cytokines IL-1 $\beta$  and IL-13, chemokine MCP-1 and colony stimulating factor VEGF in fetal mouse brain. *J. Neuroinflammation* **9**, 83, <https://doi.org/10.1186/1742-2094-9-83>
- 346 Openshaw, R.L., Kwon, J., McColl, A., Penninger, J.M., Cavanagh, J., Pratt, J.A. et al. (2019) JNK signalling mediates aspects of maternal immune activation: importance of maternal genotype in relation to schizophrenia risk. *J. Neuroinflammation* **16**, 18, <https://doi.org/10.1186/s12974-019-1408-5>
- 347 Garcia-Valtanen, P., van Diermen, B.A., Lakhan, N., Lousberg, E.L., Robertson, S.A., Hayball, J.D. et al. (2020) Maternal host responses to poly(I:C) during pregnancy leads to both dysfunctional immune profiles and altered behaviour in the offspring. *Am. J. Reprod. Immunol.* **84**, e13260, <https://doi.org/10.1111/aji.13260>
- 348 Gilmore, J.H., Jarskog, L.F. and Vadlamudi, S. (2005) Maternal poly I:C exposure during pregnancy regulates TNF  $\alpha$ , BDNF, and NGF expression in neonatal brain and the maternal-fetal unit of the rat. *J. Neuroimmunol.* **159**, 106–112, <https://doi.org/10.1016/j.jneuroim.2004.10.008>
- 349 Liverman, C.S., Kaftan, H.A., Cui, L., Hersperger, S.G., Taboada, E., Klein, R.M. et al. (2006) Altered expression of pro-inflammatory and developmental genes in the fetal brain in a mouse model of maternal infection. *Neurosci. Lett.* **399**, 220–225, <https://doi.org/10.1016/j.neulet.2006.01.064>
- 350 Elovitz, M.A., Brown, A.G., Breen, K., Anton, L., Maubert, M. and Burd, I. (2011) Intrauterine inflammation, insufficient to induce parturition, still evokes fetal and neonatal brain injury. *Int. J. Dev. Neurosci.* **29**, 663–671, <https://doi.org/10.1016/j.ijdevneu.2011.02.011>
- 351 Ginsberg, Y., Khatib, N., Saadi, N., Ross, M.G., Weiner, Z. and Belosoesky, R. (2018) Maternal pomegranate juice attenuates maternal inflammation-induced fetal brain injury by inhibition of apoptosis, neuronal nitric oxide synthase, and NF- $\kappa$ B in a rat model. *Am. J. Obstet. Gynecol.* **219**, 113.e1–113.e9, <https://doi.org/10.1016/j.ajog.2018.04.040>
- 352 Golan, H.M., Lev, V., Hallak, M., Sorokin, Y. and Huleihel, M. (2005) Specific neurodevelopmental damage in mice offspring following maternal inflammation during pregnancy. *Neuropharmacology* **48**, 903–917, <https://doi.org/10.1016/j.neuropharm.2004.12.023>
- 353 Simões, L.R., Sangiogo, G., Tashiro, M.H., Generoso, J.S., Faller, C.J., Domingui, D. et al. (2018) Maternal immune activation induced by lipopolysaccharide triggers immune response in pregnant mother and fetus, and induces behavioral impairment in adult rats. *J. Psychiatr. Res.* **100**, 71–83, <https://doi.org/10.1016/j.jpsychires.2018.02.007>
- 354 Paintlia, M.K., Paintlia, A.S., Barbosa, E., Singh, I. and Singh, A.K. (2004) N-acetylcysteine prevents endotoxin-induced degeneration of oligodendrocyte progenitors and hypomyelination in developing rat brain. *J. Neurosci. Res.* **78**, 347–361, <https://doi.org/10.1002/jnr.20261>
- 355 Paintlia, M.K., Paintlia, A.S., Singh, A.K. and Singh, I. (2008) Attenuation of lipopolysaccharide induced inflammatory response and phospholipids metabolism at the fetomaternal interface by N-acetyl cysteine. *Pediatr. Res.* **64**, 334–339, <https://doi.org/10.1203/PDR.0b013e318181e07c>
- 356 Urakubo, A., Jarskog, L.F., Lieberman, J.A. and Gilmore, J.H. (2001) Prenatal exposure to maternal infection alters cytokine expression in the placenta, amniotic fluid, and fetal brain. *Schizophr. Res.* **47**, 27–36, [https://doi.org/10.1016/S0920-9964\(00\)00032-3](https://doi.org/10.1016/S0920-9964(00)00032-3)
- 357 Ning, H., Wang, H., Zhao, L., Zhang, C., Li, X.Y., Chen, Y.H. et al. (2008) Maternally administered lipopolysaccharide (LPS) increases tumor necrosis factor  $\alpha$  in fetal liver and fetal brain: its suppression by low-dose LPS pretreatment. *Toxicol. Lett.* **176**, 13–19, <https://doi.org/10.1016/j.toxlet.2007.08.002>
- 358 Boles, J.L., Ross, M.G., Belosoesky, R., Desai, M. and Belkacemi, L. (2012) Placental-mediated increased cytokine response to lipopolysaccharides: a potential mechanism for enhanced inflammation susceptibility of the preterm fetus. *J. Inflamm. Res.* **5**, 67–75
- 359 Vallières, L., Campbell, I.L., Gage, F.H. and Sawchenko, P.E. (2002) Reduced hippocampal neurogenesis in adult transgenic mice with chronic astrocytic production of interleukin-6. *J. Neurosci.* **22**, 486–492, <https://doi.org/10.1523/JNEUROSCI.22-02-00486.2002>
- 360 Hao, L.Y., Hao, X.Q., Li, S.H. and Li, X.H. (2010) Prenatal exposure to lipopolysaccharide results in cognitive deficits in age-increasing offspring rats. *Neuroscience* **166**, 763–770, <https://doi.org/10.1016/j.neuroscience.2010.01.006>
- 361 Samuelsson, A.M., Jennische, E., Hansson, H.A. and Holmäng, A. (2006) Prenatal exposure to interleukin-6 results in inflammatory neurodegeneration in hippocampus with NMDA/GABA(A) dysregulation and impaired spatial learning. *Am. J. Physiol. Regul. Integr. Comp. Physiol.* **290**, R1345–R1356, <https://doi.org/10.1152/ajpregu.00268.2005>
- 362 Lin, Y.L. and Wang, S. (2014) Prenatal lipopolysaccharide exposure increases depression-like behaviors and reduces hippocampal neurogenesis in adult rats. *Behav. Brain Res.* **259**, 24–34, <https://doi.org/10.1016/j.bbr.2013.10.034>
- 363 Stolp, H.B., Turnquist, C., Dziegielewska, K.M., Saunders, N.R., Anthony, D.C. and Molnár, Z. (2011) Reduced ventricular proliferation in the foetal cortex following maternal inflammation in the mouse. *Brain* **134**, 3236–3248, <https://doi.org/10.1093/brain/awr237>
- 364 Graciarena, M., Depino, A.M. and Pitossi, F.J. (2010) Prenatal inflammation impairs adult neurogenesis and memory related behavior through persistent hippocampal TGF $\beta$ 1 downregulation. *Brain Behav. Immun.* **24**, 1301–1309, <https://doi.org/10.1016/j.bbi.2010.06.005>
- 365 Cui, K., Ashdown, H., Luheshi, G.N. and Boksa, P. (2009) Effects of prenatal immune activation on hippocampal neurogenesis in the rat. *Schizophr. Res.* **113**, 288–297, <https://doi.org/10.1016/j.schres.2009.05.003>
- 366 Wolf, S.A., Melnik, A. and Kempermann, G. (2011) Physical exercise increases adult neurogenesis and telomerase activity, and improves behavioral deficits in a mouse model of schizophrenia. *Brain Behav. Immun.* **25**, 971–980, <https://doi.org/10.1016/j.bbi.2010.10.014>
- 367 De Miranda, J., Yaddanapudi, K., Hornig, M., Villar, G., Serge, R. and Lipkin, W.I. (2010) Induction of Toll-like receptor 3-mediated immunity during gestation inhibits cortical neurogenesis and causes behavioral disturbances. *mBio* **1**, e00176–e00210, <https://doi.org/10.1128/mBio.00176-10>

- 368 Zhao, Q., Wang, Q., Wang, J., Tang, M., Huang, S., Peng, K. et al. (2019) Maternal immune activation-induced PPAR $\gamma$ -dependent dysfunction of microglia associated with neurogenic impairment and aberrant postnatal behaviors in offspring. *Neurobiol. Dis.* **125**, 1–13, <https://doi.org/10.1016/j.nbd.2019.01.005>
- 369 Rousset, C.I., Chalon, S., Cantagrel, S., Bodard, S., Andres, C., Gressens, P. et al. (2006) Maternal exposure to LPS induces hypomyelination in the internal capsule and programmed cell death in the deep gray matter in newborn rats. *Pediatr. Res.* **59**, 428–433, <https://doi.org/10.1203/01.pdr.0000199905.08848.55>
